# Supplementary material for: Type-I dyotropic rearrangement for 1,2-disubstituted cyclohexanes: substitution effect on activation energy
Source: Royal Society of Chemistry journal article supplement (doi:10.1039/c5ra25482e), 2016-01-01

## Type-I dyotropic rearrangement for 1,2-disubstituted cyclohexanes: substitution effect on activation energy

Nadeem S. Sheikh

*Department of Chemistry, Faculty of Science, King Faisal University*

*P.O. Box 380, Al-Ahsa 31982, Saudi Arabia*

*Email: n.sadiq.s@gmail.com; nsheikh@kfu.edu.sa; Fax: +966 (0)13 588 6437; Tel. +966 (0)13 589 9574*

| Page        | Contents                                                                                                    |
|-------------|-------------------------------------------------------------------------------------------------------------|
| S 1         | Complete citation for reference 52                                                                          |
| S 2 – S 3   | Optimized transition state structures                                                                       |
| S 4 – S 5   | Energies for 1,2-disubstituted cyclohexanes                                                                 |
| S 6 – S 7   | Energies for the transition states of 1,2-disubstituted cyclohexanes                                        |
| S 8 – S 9   | Bond distances for the transition states of 1,2-disubstituted cyclohexanes                                  |
| S 10 – S 11 | Bond angles for the transition states of 1,2-disubstituted cyclohexanes                                     |
| S 12 – S 77 | Cartesian coordinates for 1,2-disubstituted cyclohexanes and corresponding transition states along with IRC |

### Complete citation for reference 52:

GAUSSIAN09, Revision D.01, M. J. Frisch, G. W. Trucks, H. B. Schlegel, G. E. Scuseria, M. A. Robb, J. R. Cheeseman, G. Scalmani, V. Barone, B. Mennucci, G. A. Petersson, H. Nakatsuji, M. Caricato, X. Li, H. P. Hratchian, A. F. Izmaylov, J. Bloino, G. Zheng, J. L. Sonnenberg, M. Hada, M. Ehara, K. Toyota, R. Fukuda, J. Hasegawa, M. Ishida, T. Nakajima, Y. Honda, O. Kitao, H. Nakai, T. Vreven, J. A. Montgomery Jr., J. E. Peralta, F. Ogliaro, M. Bearpark, J. J. Heyd, E. Brothers, K. N. Kudin, V. N. Staroverov, T. Keith, R. Kobayashi, J. Normand, K. Raghavachari, A. Rendell, J. C. Burant, S. S. Iyengar, J. Tomasi, M. Cossi, N. Rega, J. M. Millam, M. Klene, J. E. Knox, J. B. Cross, V. Bakken, C. Adamo, J. Jaramillo, R. Gomperts, R. E. Stratmann, O. Yazyev, A. J. Austin, R. Cammi, C. Pomelli, J. W. Ochterski, R. L. Martin, K. Morokuma, V. G. Zakrzewski, G. A. Voth, P. Salvador, J. J. Dannenberg, S. Dapprich, A. D. Daniels, O. Farkas, J. B. Foresman, J. V. Ortiz, J. Cioslowski and D. J. Fox, Gaussian, Inc., Wallingford CT, 2013.

## Optimized transition state structures

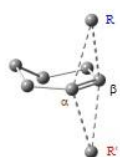

**TS1**  
R/R' = CH<sub>3</sub>

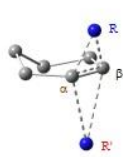

**TS2**  
R/R' = NH<sub>2</sub>

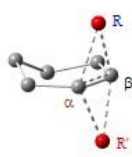

**TS3**  
R/R' = OH

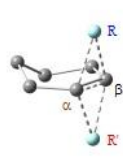

**TS4**  
R/R' = F

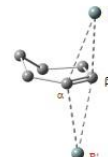

**TS5**  
R/R' = SiH<sub>3</sub>

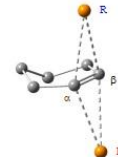

**TS6**  
R/R' = PH<sub>2</sub>

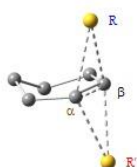

**TS7**  
R/R' = SH

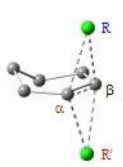

**TS8**  
R/R' = Cl

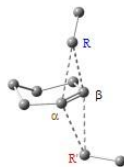

**TS9**  
R/R' = CH<sub>2</sub>CH<sub>3</sub>

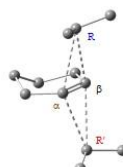

**TS10**  
R/R' = CH(CH<sub>3</sub>)<sub>2</sub>

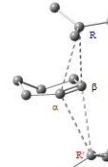

**TS11**  
R/R' = C(CH<sub>3</sub>)<sub>3</sub>

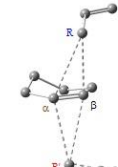

**TS12**  
R/R' = CH<sub>2</sub>CHCH<sub>2</sub>

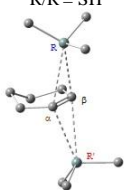

**TS13**  
R/R' = Si(CH<sub>3</sub>)<sub>3</sub>

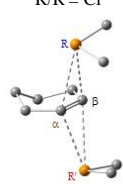

**TS14**  
R/R' = P(CH<sub>3</sub>)<sub>2</sub>

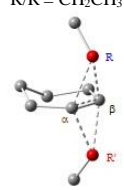

**TS15**  
R/R' = OCH<sub>3</sub>

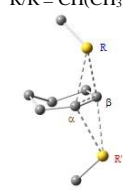

**TS16**  
R/R' = SCH<sub>3</sub>

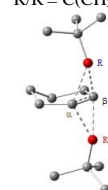

**TS17**  
R/R' = OC(CH<sub>3</sub>)<sub>3</sub>

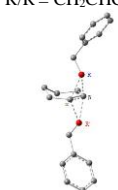

**TS18**  
R/R' = OCH<sub>2</sub>Ph

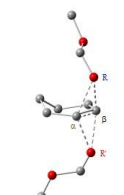

**TS19**  
R/R' = OCH<sub>2</sub>OCH<sub>3</sub>

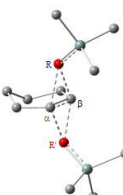

**TS20**  
R/R' = OSi(CH<sub>3</sub>)<sub>3</sub>

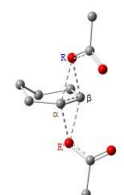

**TS21**  
R/R' = OC(O)CH<sub>3</sub>

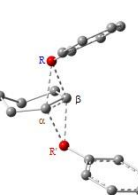

**TS22**  
R/R' = OPh

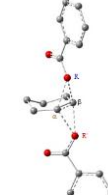

**TS23**  
R/R' = OC(O)Ph

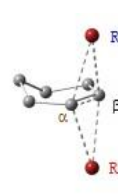

**TS24**  
R/R' = Br

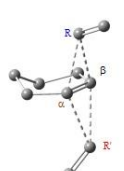

**TS25**  
R/R' = CHCH<sub>2</sub>

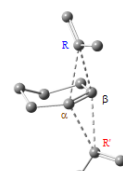

**TS26**  
R/R' = C(CH<sub>3</sub>)C(CH<sub>3</sub>)<sub>2</sub>

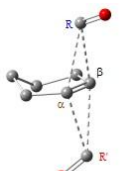

**TS27**  
R/R' = C(O)H

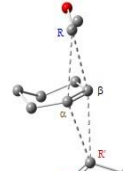

**TS28**  
R/R' = C(O)CH<sub>3</sub>

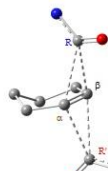

**TS29**  
R/R' = C(O)NH<sub>2</sub>

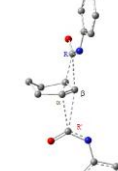

**TS30**  
R/R' = C(O)NHPh

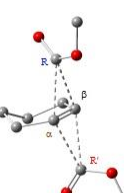

**TS31**  
R/R' = C(O)OCH<sub>3</sub>

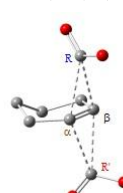

**TS32**  
R/R' = C(O)OH

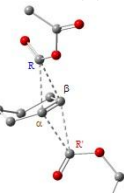

**TS33**  
R/R' = C(O)OC(O)CH<sub>3</sub>

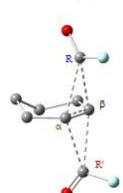

**TS34**  
R/R' = C(O)F

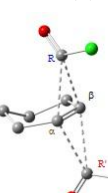

**TS35**  
R/R' = C(O)Cl

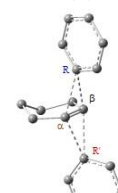

**TS36**  
R/R' = Ph

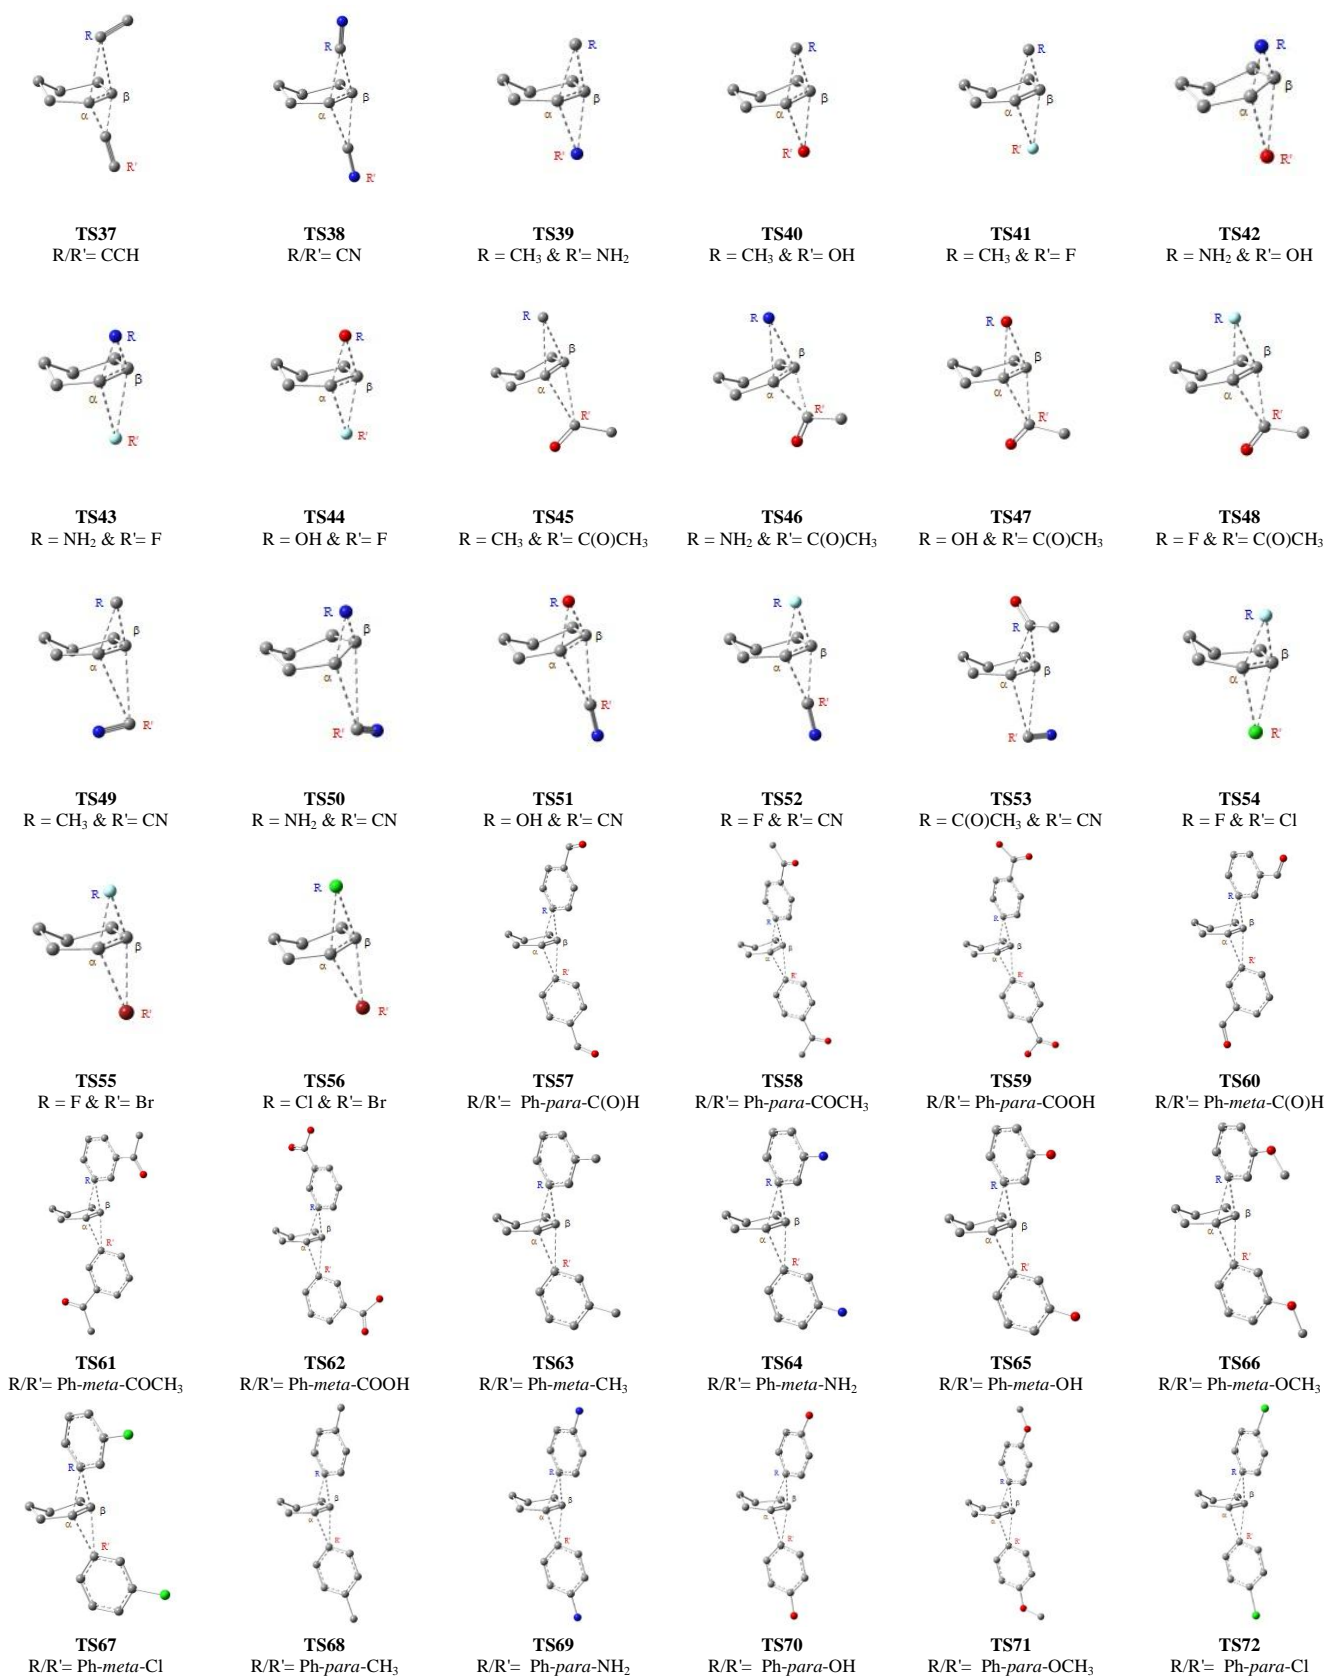

**Fig. 1** Optimized transition state structures for type-I dyotropic rearrangement of 1,2-disubstituted cyclohexane motifs; for lucidity, hydrogen atoms are not shown.

## Energies for 1,2-disubstituted cyclohexanes

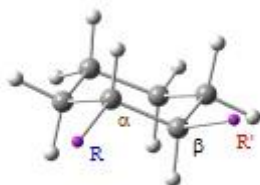

1,2-disubstituted cyclohexane

Fig. 2 Generic representation of 1,2-disubstituted cyclohexanes.

| Entry | Substituents<br>(R and R')         | 1,2-Disubstituted cyclohexanes, (Hartree) |                                              |                   |
|-------|------------------------------------|-------------------------------------------|----------------------------------------------|-------------------|
|       |                                    | Total Electronic Energy                   | Sum of Electronic and<br>Zero-Point Energies | Gibbs Free Energy |
| S1    | CH <sub>3</sub>                    | -314.5326924                              | -314.3065740                                 | -314.3387410      |
| S2    | NH <sub>2</sub>                    | -346.6075796                              | -346.4030200                                 | -346.4348830      |
| S3    | OH                                 | -386.3427509                              | -386.1640390                                 | -386.1959290      |
| S4    | F                                  | -434.3884663                              | -434.233814                                  | -434.265325       |
| S5    | SiH <sub>3</sub>                   | -817.2798810                              | -817.0804440                                 | -817.1160220      |
| S6    | PH <sub>2</sub>                    | -919.7815483                              | -919.5959200                                 | -919.6307440      |
| S7    | SH                                 | -1032.2722078                             | -1032.1036000                                | -1032.1379060     |
| S8    | Cl                                 | -1155.096159                              | -1154.944001                                 | -1154.977028      |
| S9    | CH <sub>2</sub> CH <sub>3</sub>    | -393.1637502                              | -392.8808020                                 | -392.9174720      |
| S10   | CH(CH <sub>3</sub> ) <sub>2</sub>  | -471.7872252                              | -471.4476460                                 | -471.4868440      |
| S11   | C(CH <sub>3</sub> ) <sub>3</sub>   | -550.4098595                              | -550.0141710                                 | -550.0549940      |
| S12   | CH <sub>2</sub> CHCH <sub>2</sub>  | -469.3276294                              | -469.0351620                                 | -469.0750010      |
| S13   | Si(CH <sub>3</sub> ) <sub>3</sub>  | -1053.2645960                             | -1052.8924090                                | -1052.9415990     |
| S14   | P(CH <sub>3</sub> ) <sub>2</sub>   | -1077.0708378                             | -1076.7686440                                | -1076.8110840     |
| S15   | OCH <sub>3</sub>                   | -464.9492652                              | -464.7145310                                 | -464.7514170      |
| S16   | SCH <sub>3</sub>                   | -1110.9049075                             | -1110.6772110                                | -1110.7163390     |
| S17   | OC(CH <sub>3</sub> ) <sub>3</sub>  | -700.8681409                              | -700.4660900                                 | -700.5123740      |
| S18   | OCH <sub>2</sub> Ph                | -927.0835523                              | -926.6862740                                 | -926.7407120      |
| S19   | OCH <sub>2</sub> OCH <sub>3</sub>  | -694.0122519                              | -693.7109960                                 | -693.7559960      |
| S20   | OSi(CH <sub>3</sub> ) <sub>3</sub> | -1203.8016494                             | -1203.4202190                                | -1203.4741130     |
| S21   | OC(O)CH <sub>3</sub>               | -691.6867218                              | -691.4325350                                 | -691.4774040      |
| S22   | OPh                                | -848.4604703                              | -848.1200190                                 | -848.1664300      |
| S23   | OC(O)Ph                            | -1075.1507395                             | -1074.7902590                                | -1074.8436250     |
| S24   | Br                                 | -5378.160663                              | -5378.009397                                 | -5378.044431      |
| S25   | CHCH <sub>2</sub>                  | -390.6944437                              | -390.458464                                  | -390.494087       |
| S26   | C(CH <sub>3</sub> )CH <sub>2</sub> | -469.3261414                              | -469.033544                                  | -469.072344       |
| S27   | C(O)H                              | 462.5430736                               | -462.355221                                  | -462.390441       |
| S28   | C(O)CH <sub>3</sub>                | -541.194769                               | -540.950479                                  | -540.989534       |
| S29   | C(O)NH <sub>2</sub>                | -573.3262967                              | -573.102645                                  | -573.142095       |
| S30   | C(O)NHPh                           | -1035.443042                              | -1035.056449                                 | -1035.109664      |
| S31   | C(O)OCH <sub>3</sub>               | -691.6687055                              | -691.412888                                  | -691.455602       |
| S32   | C(O)OH                             | -613.0607921                              | -612.860646                                  | -612.898766       |
| S33   | C(O)OC(O)CH <sub>3</sub>           | -918.3540306                              | -918.081441                                  | -918.132623       |
| S34   | C(O)F                              | -661.0766282                              | -660.902414                                  | -660.940391       |
| S35   | C(O)Cl                             | -1381.765613                              | -1381.5947                                   | -1381.634488      |
| S36   | Ph                                 | -698.0176802                              | -697.685074                                  | -697.727569       |
| S37   | CCH                                | -388.1873231                              | -387.999077                                  | -388.033376       |
| S38   | CN                                 | -420.3824481                              | -420.214744                                  | -420.248854       |

| Entry | Substituents        |                     | 1,2-Disubstituted cyclohexanes, (Hartree) |                                           |                   |
|-------|---------------------|---------------------|-------------------------------------------|-------------------------------------------|-------------------|
|       | R                   | R'                  | Total Electronic Energy                   | Sum of Electronic and Zero-Point Energies | Gibbs Free Energy |
| S39   | CH <sub>3</sub>     | NH <sub>2</sub>     | -330.5690585                              | -330.353766                               | -330.38583        |
| S40   | CH <sub>3</sub>     | OH                  | -350.437062                               | -350.234873                               | -350.267031       |
| S41   | CH <sub>3</sub>     | F                   | -374.4629003                              | -374.272461                               | -374.304272       |
| S42   | NH <sub>2</sub>     | OH                  | -366.4729718                              | -366.281542                               | -366.313537       |
| S43   | NH <sub>2</sub>     | F                   | -390.4981274                              | -390.318554                               | -390.350289       |
| S44   | OH                  | F                   | -410.3647795                              | -410.197931                               | -410.229552       |
| S45   | CH <sub>3</sub>     | C(O)CH <sub>3</sub> | -427.86421                                | -427.628777                               | -427.664753       |
| S46   | NH <sub>2</sub>     | C(O)CH <sub>3</sub> | -443.9000962                              | -443.675627                               | -443.711668       |
| S47   | OH                  | C(O)CH <sub>3</sub> | -463.7680628                              | -463.556538                               | -463.592599       |
| S48   | F                   | C(O)CH <sub>3</sub> | -487.7919819                              | -487.592573                               | -487.628654       |
| S49   | CH <sub>3</sub>     | CN                  | -367.4602165                              | -367.263213                               | -367.296351       |
| S50   | NH <sub>2</sub>     | CN                  | -383.4960639                              | -383.310073                               | -383.343135       |
| S51   | OH                  | CN                  | -403.3629489                              | -403.18976                                | -403.222828       |
| S52   | F                   | CN                  | -427.3865267                              | -427.225339                               | -427.258174       |
| S53   | C(O)CH <sub>3</sub> | CN                  | -480.7885949                              | -480.582694                               | -480.620282       |
| S54   | F                   | Cl                  | -794.7426109                              | -794.589151                               | -794.621403       |
| S55   | F                   | Br                  | -2906.273732                              | -2906.120702                              | -2906.153955      |
| S56   | Cl                  | Br                  | -3266.627892                              | -3266.476222                              | -3266.510318      |

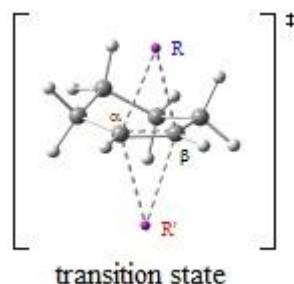

**Fig. 3** Generic representation for the transitions states of 1,2-disubstituted cyclohexanes.

### Energies for the transition states of 1,2-disubstituted cyclohexanes

| Entry | Substituents<br>(R and R')         | Transition states of 1,2-disubstituted cyclohexanes, (Hartree) |                                              |                   |
|-------|------------------------------------|----------------------------------------------------------------|----------------------------------------------|-------------------|
|       |                                    | Total Electronic Energy                                        | Sum of Electronic and<br>Zero-Point Energies | Gibbs Free Energy |
| TS1   | CH <sub>3</sub>                    | -314.3288415                                                   | -314.1138790                                 | -314.1498570      |
| TS2   | NH <sub>2</sub>                    | -346.4534348                                                   | -346.2563820                                 | -346.2893020      |
| TS3   | OH                                 | -386.2151409                                                   | -386.0415720                                 | -386.0733900      |
| TS4   | F                                  | -434.2912085                                                   | -434.140499                                  | -434.172232       |
| TS5   | SiH <sub>3</sub>                   | -817.1310973                                                   | -816.9392150                                 | -816.9797290      |
| TS6   | PH <sub>2</sub>                    | -919.6736675                                                   | -919.4944570                                 | -919.5326070      |
| TS7   | SH                                 | -1032.1901163                                                  | -1032.0255120                                | -1032.0602870     |
| TS8   | Cl                                 | -1155.035379                                                   | -1154.886252                                 | -1154.919981      |
| TS9   | CH <sub>2</sub> CH <sub>3</sub>    | -392.9612230                                                   | -392.6893100                                 | -392.7297050      |
| TS10  | CH(CH <sub>3</sub> ) <sub>2</sub>  | -471.6000373                                                   | -471.2733120                                 | -471.3188440      |
| TS11  | C(CH <sub>3</sub> ) <sub>3</sub>   | -550.2422946                                                   | -549.8614620                                 | -549.9128710      |
| TS12  | CH <sub>2</sub> CHCH <sub>2</sub>  | -469.1732396                                                   | -468.8914810                                 | -468.9361080      |
| TS13  | Si(CH <sub>3</sub> ) <sub>3</sub>  | -1053.1042221                                                  | -1052.7378260                                | -1052.7947180     |
| TS14  | P(CH <sub>3</sub> ) <sub>2</sub>   | -1076.9560053                                                  | -1076.6599210                                | -1076.7087220     |
| TS15  | OCH <sub>3</sub>                   | -464.8299248                                                   | -464.6009190                                 | -464.6379720      |
| TS16  | SCH <sub>3</sub>                   | -1110.8212245                                                  | -1110.5973110                                | -1110.6380100     |
| TS17  | OC(CH <sub>3</sub> ) <sub>3</sub>  | -700.7206532                                                   | -700.3238060                                 | -700.3694150      |
| TS18  | OCH <sub>2</sub> Ph                | -926.9519426                                                   | -926.5602130                                 | -926.6134970      |
| TS19  | OCH <sub>2</sub> OCH <sub>3</sub>  | -693.8824171                                                   | -693.5874490                                 | -693.6319650      |
| TS20  | OSi(CH <sub>3</sub> ) <sub>3</sub> | -1203.6833691                                                  | -1203.3069210                                | -1203.3627570     |
| TS21  | OC(O)CH <sub>3</sub>               | -691.5788691                                                   | -691.3307320                                 | -691.3768590      |
| TS22  | OPh                                | -848.3572557                                                   | -848.0228270                                 | -848.0710370      |
| TS23  | OC(O)Ph                            | -1075.0650559                                                  | -1074.7099150                                | -1074.7648920     |
| TS24  | Br                                 | -5378.10789                                                    | -5377.959205                                 | -5377.995115      |
| TS25  | CHCH <sub>2</sub>                  | -390.4840045                                                   | -390.257552                                  | -390.295201       |
| TS26  | C(CH <sub>3</sub> )CH <sub>2</sub> | -469.1293357                                                   | -468.846597                                  | -468.888237       |
| TS27  | C(O)H                              | -462.3533134                                                   | -462.177382                                  | -462.21752        |
| TS28  | C(O)CH <sub>3</sub>                | -541.183833                                                    | -540.783902                                  | -540.829929       |
| TS29  | C(O)NH <sub>2</sub>                | -573.1428109                                                   | -572.92829                                   | -572.971812       |
| TS30  | C(O)NHPh                           | -1035.266837                                                   | -1034.888886                                 | -1034.947225      |
| TS31  | C(O)OCH <sub>3</sub>               | -691.482772                                                    | -691.235851                                  | -691.283382       |
| TS32  | C(O)OH                             | -612.875188                                                    | -612.684406                                  | -612.726768       |
| TS33  | C(O)OC(O)CH <sub>3</sub>           | -918.1721754                                                   | -917.908328                                  | -917.964299       |
| TS34  | C(O)F                              | -660.8951567                                                   | -660.729566                                  | -660.771831       |
| TS35  | C(O)Cl                             | -1381.609709                                                   | -1381.447343                                 | -1381.493517      |

|      |     |              |             |             |
|------|-----|--------------|-------------|-------------|
| TS36 | Ph  | -697.8189253 | -697.494194 | -697.54001  |
| TS37 | CCH | -387.9966093 | -387.815649 | -387.853247 |
| TS38 | CN  | -420.2052165 | -420.044392 | -420.081853 |

| Entry | Substituents        |                     | Transition states of 1,2-disubstituted cyclohexanes, (Hartree) |                                           |                   |
|-------|---------------------|---------------------|----------------------------------------------------------------|-------------------------------------------|-------------------|
|       | R                   | R'                  | Total Electronic Energy                                        | Sum of Electronic and Zero-Point Energies | Gibbs Free Energy |
| TS39  | CH <sub>3</sub>     | NH <sub>2</sub>     | -330.38583                                                     | -330.3928581                              | -330.186451       |
| TS40  | CH <sub>3</sub>     | OH                  | -350.267031                                                    | -350.2861224                              | -350.090595       |
| TS41  | CH <sub>3</sub>     | F                   | -374.304272                                                    | -374.334973                               | -374.149469       |
| TS42  | NH <sub>2</sub>     | OH                  | -366.313537                                                    | -366.3523429                              | -366.165718       |
| TS43  | NH <sub>2</sub>     | F                   | -390.350289                                                    | -390.403888                               | -390.227241       |
| TS44  | OH                  | F                   | -410.229552                                                    | -410.2617874                              | -410.099081       |
| TS45  | CH <sub>3</sub>     | C(O)CH <sub>3</sub> | -427.664753                                                    | -427.6732836                              | -427.448369       |
| TS46  | NH <sub>2</sub>     | C(O)CH <sub>3</sub> | -443.711668                                                    | -443.7332102                              | -443.517416       |
| TS47  | OH                  | C(O)CH <sub>3</sub> | -463.592599                                                    | -463.622482                               | -463.41809        |
| TS48  | F                   | C(O)CH <sub>3</sub> | -487.628654                                                    | -487.66876                                | -487.474959       |
| TS49  | CH <sub>3</sub>     | CN                  | -367.296351                                                    | -367.303087                               | -367.112227       |
| TS50  | NH <sub>2</sub>     | CN                  | -383.343135                                                    | -383.3751882                              | -383.192912       |
| TS51  | OH                  | CN                  | -403.222828                                                    | -403.2200785                              | -403.052102       |
| TS52  | F                   | CN                  | -427.258174                                                    | -427.2514909                              | -427.095521       |
| TS53  | C(O)CH <sub>3</sub> | CN                  | -480.620282                                                    | -480.63342                                | -480.434449       |
| TS54  | F                   | Cl                  | -794.621403                                                    | -794.6632752                              | -794.513396       |
| TS55  | F                   | Br                  | -2906.153955                                                   | -2906.198305                              | -2906.048666      |
| TS56  | Cl                  | Br                  | -3266.510318                                                   | -3266.571037                              | -3266.42223       |

## Bond distances for the transition states of 1,2-disubstituted cyclohexanes

| Entry | Substituents<br>(R and R')         |                 | Bond distance ( <i>r</i> ), Å  |                   |                   |                    |                    | Average bond<br>distance ( <i>r</i> ), Å |
|-------|------------------------------------|-----------------|--------------------------------|-------------------|-------------------|--------------------|--------------------|------------------------------------------|
|       |                                    |                 | C <sup>α</sup> -C <sup>β</sup> | C <sup>α</sup> -R | C <sup>β</sup> -R | C <sup>α</sup> -R' | C <sup>β</sup> -R' | C <sup>α</sup> /C <sup>β</sup> -R/R'     |
| TS1   | CH <sub>3</sub>                    |                 | <b>1.368</b>                   | 2.431             | 2.404             | 2.430              | 2.434              | <b>2.425</b>                             |
| TS2   | NH <sub>2</sub>                    |                 | <b>1.445</b>                   | 1.639             | 1.611             | 2.495              | 2.513              | <b>2.065</b>                             |
| TS3   | OH                                 |                 | <b>1.416</b>                   | 1.979             | 1.968             | 1.968              | 1.979              | <b>1.973</b>                             |
| TS4   | F                                  |                 | <b>1.423</b>                   | 1.915             | 1.904             | 1.904              | 1.915              | <b>1.909</b>                             |
| TS5   | SiH <sub>3</sub>                   |                 | <b>1.371</b>                   | 2.905             | 2.853             | 2.853              | 2.905              | <b>2.879</b>                             |
| TS6   | PH <sub>2</sub>                    |                 | <b>1.376</b>                   | 2.811             | 2.827             | 2.765              | 2.853              | <b>2.814</b>                             |
| TS7   | SH                                 |                 | <b>1.418</b>                   | 2.505             | 2.480             | 2.480              | 2.505              | <b>2.492</b>                             |
| TS8   | Cl                                 |                 | <b>1.434</b>                   | 2.398             | 2.369             | 2.369              | 2.398              | <b>2.384</b>                             |
| TS9   | CH <sub>2</sub> CH <sub>3</sub>    |                 | <b>1.362</b>                   | 2.538             | 2.558             | 2.558              | 2.510              | <b>2.541</b>                             |
| TS10  | CH(CH <sub>3</sub> ) <sub>2</sub>  |                 | <b>1.353</b>                   | 2.712             | 2.688             | 2.688              | 2.712              | <b>2.700</b>                             |
| TS11  | C(CH <sub>3</sub> ) <sub>3</sub>   |                 | <b>1.345</b>                   | 3.117             | 3.098             | 3.098              | 3.116              | <b>3.107</b>                             |
| TS12  | CH <sub>2</sub> CHCH <sub>2</sub>  |                 | <b>1.353</b>                   | 3.172             | 2.949             | 2.975              | 3.059              | <b>3.039</b>                             |
| TS13  | Si(CH <sub>3</sub> ) <sub>3</sub>  |                 | <b>1.362</b>                   | 3.041             | 2.986             | 2.986              | 3.028              | <b>3.010</b>                             |
| TS14  | P(CH <sub>3</sub> ) <sub>2</sub>   |                 | <b>1.361</b>                   | 2.946             | 2.916             | 2.910              | 2.964              | <b>2.934</b>                             |
| TS15  | OCH <sub>3</sub>                   |                 | <b>1.418</b>                   | 1.973             | 1.962             | 1.962              | 1.973              | <b>1.967</b>                             |
| TS16  | SCH <sub>3</sub>                   |                 | <b>1.417</b>                   | 2.475             | 2.447             | 2.447              | 2.475              | <b>2.461</b>                             |
| TS17  | OC(CH <sub>3</sub> ) <sub>3</sub>  |                 | <b>1.431</b>                   | 2.029             | 1.991             | 1.994              | 2.032              | <b>2.011</b>                             |
| TS18  | OCH <sub>2</sub> Ph                |                 | <b>1.422</b>                   | 2.006             | 1.994             | 1.994              | 2.006              | <b>2.000</b>                             |
| TS19  | OCH <sub>2</sub> OCH <sub>3</sub>  |                 | <b>1.422</b>                   | 2.067             | 1.999             | 1.999              | 2.066              | <b>2.033</b>                             |
| TS20  | OSi(CH <sub>3</sub> ) <sub>3</sub> |                 | <b>1.424</b>                   | 1.976             | 1.973             | 1.973              | 1.976              | <b>1.975</b>                             |
| TS21  | OC(O)CH <sub>3</sub>               |                 | <b>1.420</b>                   | 2.082             | 2.037             | 2.037              | 2.082              | <b>2.059</b>                             |
| TS22  | OPh                                |                 | <b>1.420</b>                   | 2.028             | 2.013             | 2.013              | 2.028              | <b>2.021</b>                             |
| TS23  | OC(O)Ph                            |                 | <b>1.432</b>                   | 2.074             | 2.099             | 2.089              | 2.073              | <b>2.084</b>                             |
| TS24  | Br                                 |                 | <b>1.428</b>                   | 2.524             | 2.488             | 2.488              | 2.524              | <b>2.506</b>                             |
| TS25  | CHCH <sub>2</sub>                  |                 | <b>1.378</b>                   | 2.373             | 2.375             | 2.239              | 2.252              | <b>2.310</b>                             |
| TS26  | C(CH <sub>3</sub> )CH <sub>2</sub> |                 | <b>1.375</b>                   | 2.370             | 2.348             | 2.381              | 2.391              | <b>2.372</b>                             |
| TS27  | C(O)H                              |                 | <b>1.364</b>                   | 2.569             | 2.556             | 2.585              | 2.617              | <b>2.582</b>                             |
| TS28  | C(O)CH <sub>3</sub>                |                 | <b>1.362</b>                   | 2.716             | 2.678             | 2.678              | 2.717              | <b>2.697</b>                             |
| TS29  | C(O)NH <sub>2</sub>                |                 | <b>1.369</b>                   | 2.573             | 2.538             | 2.513              | 2.534              | <b>2.539</b>                             |
| TS30  | C(O)NHPh                           |                 | <b>1.369</b>                   | 2.612             | 2.581             | 2.581              | 2.612              | <b>2.597</b>                             |
| TS31  | C(O)OCH <sub>3</sub>               |                 | <b>1.378</b>                   | 2.427             | 2.414             | 2.415              | 2.427              | <b>2.421</b>                             |
| TS32  | C(O)OH                             |                 | <b>1.380</b>                   | 2.417             | 2.403             | 2.403              | 2.417              | <b>2.410</b>                             |
| TS33  | C(O)OC(O)CH <sub>3</sub>           |                 | <b>1.381</b>                   | 2.417             | 2.413             | 2.411              | 2.429              | <b>2.417</b>                             |
| TS34  | C(O)F                              |                 | <b>1.387</b>                   | 2.379             | 2.365             | 2.365              | 2.379              | <b>2.372</b>                             |
| TS35  | C(O)Cl                             |                 | <b>1.385</b>                   | 2.426             | 2.410             | 2.407              | 2.424              | <b>2.417</b>                             |
| TS36  | Ph                                 |                 | <b>1.379</b>                   | 2.329             | 2.327             | 2.327              | 2.329              | <b>2.328</b>                             |
| TS37  | CCH                                |                 | <b>1.431</b>                   | 1.717             | 1.643             | 2.778              | 2.648              | <b>2.197</b>                             |
| TS38  | CN                                 |                 | <b>1.410</b>                   | 2.192             | 2.174             | 2.174              | 2.192              | <b>2.183</b>                             |
| Entry | Substituents                       |                 | Bond distance ( <i>r</i> ), Å  |                   |                   |                    |                    |                                          |
|       | R                                  | R'              | C <sup>α</sup> -C <sup>β</sup> | C <sup>α</sup> -R | C <sup>β</sup> -R | C <sup>α</sup> -R' | C <sup>β</sup> -R' |                                          |
| TS39  | CH <sub>3</sub>                    | NH <sub>2</sub> | <b>1.399</b>                   | 2.092             | 2.079             | 2.213              | 2.216              |                                          |
| TS40  | CH <sub>3</sub>                    | OH              | <b>1.388</b>                   | 2.065             | 2.047             | 2.232              | 2.233              |                                          |



|      |                     |                     |              |       |       |       |       |
|------|---------------------|---------------------|--------------|-------|-------|-------|-------|
| TS41 | CH <sub>3</sub>     | F                   | <b>1.385</b> | 1.988 | 1.965 | 2.223 | 2.215 |
| TS42 | NH <sub>2</sub>     | OH                  | <b>1.449</b> | 1.613 | 1.574 | 2.426 | 2.513 |
| TS43 | NH <sub>2</sub>     | F                   | <b>1.443</b> | 1.608 | 1.586 | 2.352 | 2.398 |
| TS44 | OH                  | F                   | <b>1.421</b> | 1.836 | 1.818 | 2.055 | 2.059 |
| TS45 | CH <sub>3</sub>     | C(O)CH <sub>3</sub> | <b>1.367</b> | 2.427 | 2.414 | 2.625 | 2.664 |
| TS46 | NH <sub>2</sub>     | C(O)CH <sub>3</sub> | <b>1.404</b> | 2.392 | 2.404 | 1.942 | 1.965 |
| TS47 | OH                  | C(O)CH <sub>3</sub> | <b>1.389</b> | 2.187 | 2.171 | 2.217 | 2.226 |
| TS48 | F                   | C(O)CH <sub>3</sub> | <b>1.385</b> | 2.182 | 2.165 | 2.126 | 2.133 |
| TS49 | CH <sub>3</sub>     | CN                  | <b>1.394</b> | 1.909 | 1.854 | 2.952 | 2.772 |
| TS50 | NH <sub>2</sub>     | CN                  | <b>1.463</b> | 1.735 | 1.509 | 2.516 | 2.867 |
| TS51 | OH                  | CN                  | <b>1.427</b> | 1.774 | 1.743 | 2.466 | 2.470 |
| TS52 | F                   | CN                  | <b>1.415</b> | 1.965 | 1.956 | 2.063 | 2.077 |
| TS53 | C(O)CH <sub>3</sub> | CN                  | <b>1.387</b> | 2.102 | 2.079 | 2.679 | 2.771 |
| TS54 | F                   | Cl                  | <b>1.432</b> | 1.902 | 1.879 | 2.387 | 2.397 |
| TS55 | F                   | Br                  | <b>1.430</b> | 1.933 | 1.909 | 2.469 | 2.482 |
| TS56 | Cl                  | Br                  | <b>1.431</b> | 2.446 | 2.417 | 2.444 | 2.479 |

## Bond angles for the transition states of 1,2-disubstituted cyclohexanes

| Entry | Substituents<br>(R and R')         |  | Bond angle, $\theta$ |                       | Average bond angle, $\theta$ |
|-------|------------------------------------|--|----------------------|-----------------------|------------------------------|
|       |                                    |  | $C^\alpha-R-C^\beta$ | $C^\alpha-R'-C^\beta$ |                              |
| TS1   | CH <sub>3</sub>                    |  | 32.86                | 32.67                 | <b>32.77</b>                 |
| TS2   | NH <sub>2</sub>                    |  | 52.77                | 33.53                 | <b>43.15</b>                 |
| TS3   | OH                                 |  | 42.05                | 42.04                 | <b>42.04</b>                 |
| TS4   | F                                  |  | 43.77                | 43.78                 | <b>43.77</b>                 |
| TS5   | SiH <sub>3</sub>                   |  | 27.52                | 27.52                 | <b>27.52</b>                 |
| TS6   | PH <sub>2</sub>                    |  | 28.25                | 28.31                 | <b>28.28</b>                 |
| TS7   | SH                                 |  | 33.04                | 33.04                 | <b>33.04</b>                 |
| TS8   | Cl                                 |  | 35.00                | 35.00                 | <b>35.00</b>                 |
| TS9   | CH <sub>2</sub> CH <sub>3</sub>    |  | 31.00                | 31.55                 | <b>31.28</b>                 |
| TS10  | CH(CH <sub>3</sub> ) <sub>2</sub>  |  | 29.03                | 29.03                 | <b>29.03</b>                 |
| TS11  | C(CH <sub>3</sub> ) <sub>3</sub>   |  | 25.00                | 25.00                 | <b>25.00</b>                 |
| TS12  | CH <sub>2</sub> CHCH <sub>2</sub>  |  | 25.21                | 25.87                 | <b>25.54</b>                 |
| TS13  | Si(CH <sub>3</sub> ) <sub>3</sub>  |  | 26.09                | 26.16                 | <b>26.13</b>                 |
| TS14  | P(CH <sub>3</sub> ) <sub>2</sub>   |  | 26.85                | 26.78                 | <b>26.81</b>                 |
| TS15  | OCH <sub>3</sub>                   |  | 42.25                | 42.26                 | <b>42.25</b>                 |
| TS16  | SCH <sub>3</sub>                   |  | 33.45                | 33.45                 | <b>33.45</b>                 |
| TS17  | OC(CH <sub>3</sub> ) <sub>3</sub>  |  | 41.70                | 41.64                 | <b>41.67</b>                 |
| TS18  | OCH <sub>2</sub> Ph                |  | 41.65                | 41.65                 | <b>41.65</b>                 |
| TS19  | OCH <sub>2</sub> OCH <sub>3</sub>  |  | 40.90                | 40.90                 | <b>40.90</b>                 |
| TS20  | OSi(CH <sub>3</sub> ) <sub>3</sub> |  | 42.27                | 42.26                 | <b>42.27</b>                 |
| TS21  | OC(O)CH <sub>3</sub>               |  | 40.32                | 40.32                 | <b>40.32</b>                 |
| TS22  | OPh                                |  | 41.15                | 41.14                 | <b>41.14</b>                 |
| TS23  | OC(O)Ph                            |  | 40.14                | 40.25                 | <b>40.20</b>                 |
| TS24  | Br                                 |  | 33.11                | 33.11                 | <b>33.11</b>                 |
| TS25  | CHCH <sub>2</sub>                  |  | 33.73                | 35.73                 | <b>34.73</b>                 |
| TS26  | C(CH <sub>3</sub> )CH <sub>2</sub> |  | 33.89                | 33.50                 | <b>33.70</b>                 |
| TS27  | C(O)H                              |  | 30.88                | 30.40                 | <b>30.64</b>                 |
| TS28  | C(O)CH <sub>3</sub>                |  | 29.24                | 29.24                 | <b>29.24</b>                 |
| TS29  | C(O)NH <sub>2</sub>                |  | 31.06                | 31.47                 | <b>31.27</b>                 |
| TS30  | C(O)NPh                            |  | 30.57                | 30.57                 | <b>30.57</b>                 |
| TS31  | C(O)OCH <sub>3</sub>               |  | 33.06                | 33.06                 | <b>33.06</b>                 |
| TS32  | C(O)OH                             |  | 33.27                | 33.27                 | <b>33.27</b>                 |
| TS33  | C(O)OC(O)CH <sub>3</sub>           |  | 33.22                | 33.14                 | <b>33.18</b>                 |
| TS34  | C(O)F                              |  | 34.00                | 34.00                 | <b>34.00</b>                 |
| TS35  | C(O)Cl                             |  | 33.30                | 33.33                 | <b>33.31</b>                 |
| TS36  | Ph                                 |  | 34.44                | 34.44                 | <b>34.44</b>                 |
| TS37  | CCH                                |  | 50.35                | 30.46                 | <b>40.40</b>                 |
| TS38  | CN                                 |  | 37.69                | 37.69                 | <b>37.69</b>                 |

| Entry | Substituents    |                 | Bond angle, $\theta$ |                       |
|-------|-----------------|-----------------|----------------------|-----------------------|
|       | R               | R'              | $C^\alpha-R-C^\beta$ | $C^\alpha-R'-C^\beta$ |
| TS39  | CH <sub>3</sub> | NH <sub>2</sub> | 39.19                | 36.83                 |
| TS40  | CH <sub>3</sub> | OH              | 39.46                | 36.24                 |

|      |                     |                     |       |       |
|------|---------------------|---------------------|-------|-------|
| TS41 | CH <sub>3</sub>     | F                   | 41.04 | 36.38 |
| TS42 | NH <sub>2</sub>     | OH                  | 54.07 | 34.07 |
| TS43 | NH <sub>2</sub>     | F                   | 53.71 | 35.36 |
| TS44 | OH                  | F                   | 45.79 | 40.43 |
| TS45 | CH <sub>3</sub>     | C(O)CH <sub>3</sub> | 32.81 | 29.95 |
| TS46 | NH <sub>2</sub>     | C(O)CH <sub>3</sub> | 34.04 | 42.11 |
| TS47 | OH                  | C(O)CH <sub>3</sub> | 37.18 | 36.44 |
| TS48 | F                   | C(O)CH <sub>3</sub> | 37.16 | 37.95 |
| TS49 | CH <sub>3</sub>     | CN                  | 43.45 | 27.96 |
| TS50 | NH <sub>2</sub>     | CN                  | 53.07 | 30.66 |
| TS51 | OH                  | CN                  | 47.85 | 33.59 |
| TS52 | F                   | CN                  | 42.31 | 39.98 |
| TS53 | C(O)CH <sub>3</sub> | CN                  | 38.75 | 29.43 |
| TS54 | F                   | Cl                  | 44.50 | 34.82 |
| TS55 | F                   | Br                  | 43.70 | 33.58 |
| TS56 | Cl                  | Br                  | 34.23 | 33.80 |

### Cartesian coordinates for 1,2-disubstituted cyclohexanes and corresponding transition states along with IRC

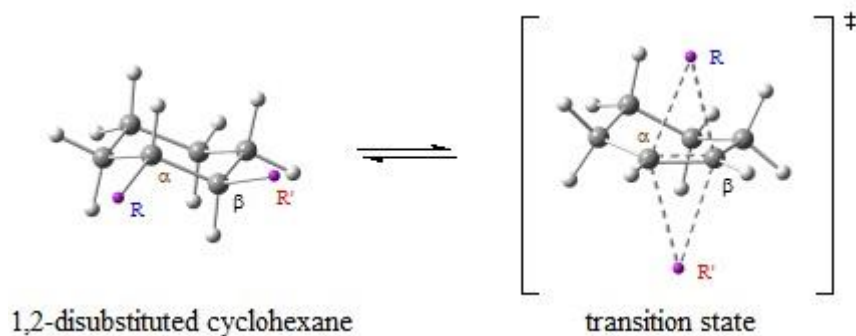

**Fig. 4** Generic representation for 1,2-disubstituted cyclohexanes and corresponding transitions states.

Cartesian coordinates for **S1** (R/R' = CH<sub>3</sub>)

|   |             |             |             |
|---|-------------|-------------|-------------|
| C | 0.71278200  | -0.89053700 | -0.31330500 |
| C | -0.71104400 | -0.89194200 | 0.31326400  |
| C | -0.97945600 | 0.40753100  | 1.10857400  |
| C | -0.71312200 | 1.68237700  | 0.29034900  |
| C | 0.70973000  | 1.68385100  | -0.29024200 |
| C | 0.97874100  | 0.40955300  | -1.10845500 |
| H | -2.01392500 | 0.40245300  | 1.47615700  |
| H | -0.75154600 | -1.72745300 | 1.02731600  |
| H | 0.75481700  | -1.72584400 | -1.02750200 |
| H | -1.43960200 | 1.75977900  | -0.53030900 |
| H | -0.86811400 | 2.56714900  | 0.92045400  |
| H | 0.86286800  | 2.56893400  | -0.92036200 |
| H | 1.43605000  | 1.76280100  | 0.53040700  |
| H | 0.33959100  | 0.42392800  | -2.00176300 |
| H | 2.01326500  | 0.40655700  | -1.47590600 |
| H | -0.34021400 | 0.42313600  | 2.00179700  |
| C | 1.80625800  | -1.15497200 | 0.73757000  |
| H | 1.63689900  | -2.11238300 | 1.24386700  |
| H | 2.79559100  | -1.19761500 | 0.26717900  |
| H | 1.84325500  | -0.37834500 | 1.50852800  |
| C | -1.80397500 | -1.15816300 | -0.73771600 |
| H | -1.63277600 | -2.11510500 | -1.24427800 |
| H | -2.79324300 | -1.20280900 | -0.26737800 |
| H | -1.84239700 | -0.38137700 | -1.50844600 |

Cartesian coordinates for **TS1** (R/R' = CH<sub>3</sub>)

|   |             |             |             |
|---|-------------|-------------|-------------|
| C | -0.09256800 | -0.84808200 | -0.70596700 |
| C | 0.02366600  | -0.88751200 | 0.65639600  |
| C | 0.15545400  | 0.35192600  | 1.50044200  |
| C | 0.50628000  | 1.59672800  | 0.66817600  |
| C | -0.34460300 | 1.68154700  | -0.60825400 |
| C | -0.18370200 | 0.43080300  | -1.49219800 |
| H | -0.14530600 | -1.78286600 | -1.25024100 |
| H | 0.05850300  | -1.85252900 | 1.14687200  |
| H | 0.91602400  | 0.17485900  | 2.26944400  |
| H | 1.56782800  | 1.55778600  | 0.39830000  |
| H | -0.07505300 | 2.57348600  | -1.18493000 |
| H | -1.02182700 | 0.34518100  | -2.19436400 |
| H | 0.71940300  | 0.50484200  | -2.11103900 |
| H | -1.39884600 | 1.79364300  | -0.33055400 |
| H | 0.36441100  | 2.49735200  | 1.27607300  |
| H | -0.79106400 | 0.49899900  | 2.03663400  |
| C | -2.33377300 | -1.04517400 | 0.21503500  |
| H | -2.63483300 | -1.73401600 | -0.57540500 |
| H | -2.48085600 | -1.46972600 | 1.20947000  |

|   |             |             |             |
|---|-------------|-------------|-------------|
| H | -2.76457800 | -0.04969000 | 0.11011500  |
| C | 2.26940000  | -1.17418400 | -0.23782800 |
| H | 2.69315400  | -0.97856500 | 0.74856600  |
| H | 2.34353700  | -2.22356600 | -0.52533100 |
| H | 2.64857600  | -0.49149700 | -0.99841300 |

IRC for **TS1** (R/R' = CH<sub>3</sub>)

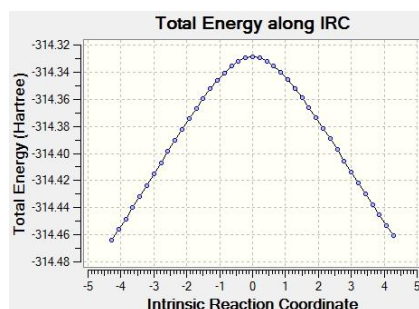

Cartesian coordinates for **S2** (R/R' = NH<sub>2</sub>)

|   |             |             |             |
|---|-------------|-------------|-------------|
| C | 0.72252400  | -0.89791900 | -0.27756300 |
| C | -0.72262200 | -0.89784000 | 0.27756400  |
| C | -1.03163600 | 0.39405300  | 1.05505500  |
| C | -0.72768000 | 1.66490700  | 0.24608300  |
| C | 0.72786500  | 1.66482500  | -0.24608600 |
| C | 1.03167500  | 0.39393900  | -1.05506200 |
| H | -2.08386600 | 0.38055300  | 1.37219700  |
| H | -0.79976600 | -1.74361100 | 0.98659000  |
| H | 0.79958200  | -1.74369800 | -0.98658500 |
| H | -1.40394000 | 1.72357800  | -0.61563300 |
| H | -0.91916900 | 2.54981600  | 0.86579000  |
| H | 0.91945700  | 2.54971100  | -0.86579300 |
| H | 1.40413000  | 1.72341500  | 0.61563100  |
| H | 0.42449300  | 0.38994400  | -1.96737200 |
| H | 2.08390200  | 0.38031500  | -1.37220600 |
| H | -0.42446200 | 0.38999600  | 1.96737100  |
| N | 1.66039700  | -1.04426300 | 0.84709800  |
| H | 1.52144700  | -1.92992300 | 1.32749700  |
| H | 2.62208100  | -1.02693200 | 0.51789500  |
| N | -1.66050600 | -1.04410100 | -0.84709400 |
| H | -1.52169300 | -1.92980400 | -1.32745200 |
| H | -2.62219100 | -1.02659500 | -0.51790500 |

Cartesian coordinates for **TS2** (R/R' = NH<sub>2</sub>)

|   |             |             |             |
|---|-------------|-------------|-------------|
| C | -0.54787100 | 0.78405800  | -0.67418300 |
| C | -0.66791500 | 0.59637900  | 0.75324200  |
| C | 0.23926200  | -0.35171700 | 1.51659500  |
| C | 1.05105500  | -1.27223800 | 0.59041800  |
| C | 1.64022700  | -0.51188000 | -0.60677300 |
| C | 0.52518600  | 0.09062800  | -1.47948800 |
| H | -1.40541300 | 1.17112400  | -1.20748000 |
| H | -1.62019600 | 0.84320500  | 1.20430400  |
| H | -0.40303200 | -0.95391700 | 2.16135700  |
| H | 0.37268400  | -2.04707900 | 0.22066100  |
| H | 2.25044600  | -1.18095500 | -1.22326100 |
| H | 0.93184600  | 0.78092900  | -2.23008300 |
| H | -0.00886400 | -0.70584200 | -2.00393900 |
| H | 2.32981200  | 0.27343100  | -0.25387100 |
| H | 1.84779800  | -1.75883000 | 1.16479300  |
| H | 0.90750600  | 0.23377000  | 2.16734500  |
| N | 0.05714200  | 1.95995000  | 0.29453800  |
| H | -0.44869500 | 2.83460400  | 0.37917800  |

|   |             |             |             |
|---|-------------|-------------|-------------|
| H | 1.06187800  | 2.04107200  | 0.41427300  |
| N | -2.07466700 | -1.16384300 | -0.35873100 |
| H | -3.08047900 | -0.95965400 | -0.32263000 |
| H | -2.05228000 | -2.15598800 | -0.62017200 |

IRC for **TS2** (R/R' = NH<sub>2</sub>)

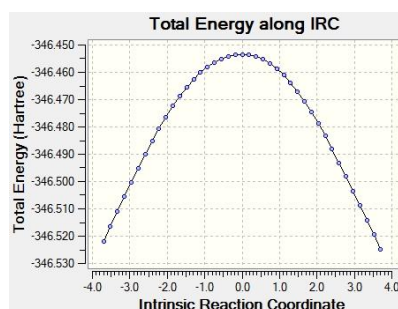

Cartesian coordinates for **S3** (R/R' = OH)

|   |             |             |             |
|---|-------------|-------------|-------------|
| C | -0.68399900 | -0.94317900 | 0.24021400  |
| C | 0.77121700  | -0.87324800 | -0.26602700 |
| C | 1.05075300  | 0.42659500  | -1.02247800 |
| C | 0.66656700  | 1.67265300  | -0.20836500 |
| C | -0.80220000 | 1.60825900  | 0.23975800  |
| C | -1.07977000 | 0.31573300  | 1.02382800  |
| H | 2.11225900  | 0.44853700  | -1.29329100 |
| H | 0.93853000  | -1.72844500 | -0.93552100 |
| H | -0.77769100 | -1.82482000 | 0.89712600  |
| H | 1.31676000  | 1.74617600  | 0.67223000  |
| H | 0.84033800  | 2.57370900  | -0.80883200 |
| H | -1.05207900 | 2.47687900  | 0.86089400  |
| H | -1.45498500 | 1.65014600  | -0.64188100 |
| H | -0.50514700 | 0.32201700  | 1.95873400  |
| H | -2.13976800 | 0.24845900  | 1.30807000  |
| H | 0.47237000  | 0.40045200  | -1.95362000 |
| O | -1.49337300 | -1.14032400 | -0.92788000 |
| O | 1.68141900  | -0.93394800 | 0.84281300  |
| H | -2.42347900 | -1.14774800 | -0.66730300 |
| H | 1.63311200  | -1.81207200 | 1.24234700  |

Cartesian coordinates for **TS3** (R/R' = OH)

|   |             |             |             |
|---|-------------|-------------|-------------|
| C | 0.90993900  | -0.28286000 | -0.64823400 |
| C | 0.90903300  | 0.28684300  | 0.64785300  |
| C | -0.36271600 | 0.64023800  | 1.37326100  |
| C | -1.61262100 | 0.60290600  | 0.47289900  |
| C | -1.61062600 | -0.60880800 | -0.47217600 |
| C | -0.36060000 | -0.64258700 | -1.37261800 |
| H | 1.85851800  | -0.48509900 | -1.12264100 |
| H | 1.85702100  | 0.49366200  | 1.12151800  |
| H | -0.23706500 | 1.63026000  | 1.82413000  |
| H | -1.66893500 | 1.52528300  | -0.11959100 |
| H | -2.50847600 | -0.60067700 | -1.09963500 |
| H | -0.23105300 | -1.63314300 | -1.82125400 |
| H | -0.46867500 | 0.05858500  | -2.20872900 |
| H | -1.66401000 | -1.53128500 | 0.12044900  |
| H | -2.51043800 | 0.59184800  | 1.10036500  |
| H | -0.46803300 | -0.06332200 | 2.20774100  |
| O | 1.14355700  | -1.66434700 | 0.74895400  |
| O | 1.13459200  | 1.66924900  | -0.74993800 |
| H | 0.28505900  | 2.09469000  | -0.94392900 |
| H | 0.29644600  | -2.09439600 | 0.94353600  |

IRC for **TS3** (R/R' = OH)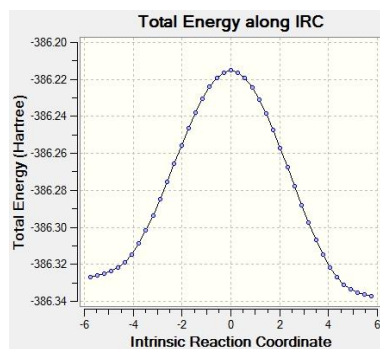Cartesian coordinates for **S4**, R/R' = F

|   |             |             |             |
|---|-------------|-------------|-------------|
| C | -0.91629400 | 0.72875300  | 0.23754800  |
| C | -0.91650600 | -0.72850400 | -0.23755200 |
| C | 0.35760800  | -1.12220400 | -0.97158900 |
| C | 1.62513900  | -0.74586500 | -0.18658300 |
| C | 1.62535200  | 0.74543100  | 0.18655900  |
| C | 0.35793400  | 1.12208600  | 0.97159500  |
| H | 0.32324100  | -2.19699900 | -1.18187200 |
| H | -1.80687600 | -0.91914100 | -0.84519700 |
| H | -1.80660300 | 0.91963600  | 0.84520100  |
| H | 1.68108000  | -1.35410700 | 0.72511600  |
| H | 2.51141900  | -0.98946100 | -0.78351500 |
| H | 2.51170600  | 0.98875700  | 0.78348800  |
| H | 1.68145300  | 1.35368600  | -0.72512000 |
| H | 0.34958800  | 0.60365100  | 1.93919500  |
| H | 0.32387200  | 2.19687800  | 1.18193900  |
| H | 0.34937200  | -0.60382600 | -1.93921800 |
| F | -1.05077700 | 1.52392700  | -0.92988200 |
| F | -1.05118300 | -1.52362200 | 0.92989500  |

Cartesian coordinates for **TS4**, R/R' = F

|   |             |             |             |
|---|-------------|-------------|-------------|
| C | -0.90803800 | -0.46832400 | 0.53586200  |
| C | -0.90797200 | 0.46883900  | -0.53560100 |
| C | 0.35241800  | 1.01484000  | -1.11828200 |
| C | 1.59537000  | 0.72211700  | -0.26041500 |
| C | 1.59506600  | -0.72299400 | 0.25989700  |
| C | 0.35221400  | -1.01509400 | 1.11810100  |
| H | -1.86231300 | -0.79764600 | 0.92496300  |
| H | -1.86215900 | 0.79861300  | -0.92448800 |
| H | 0.21563400  | 2.09064900  | -1.27263400 |
| H | 1.61415500  | 1.41869700  | 0.58471500  |
| H | 2.49438200  | -0.91063800 | 0.85593400  |
| H | 0.21484000  | -2.09087000 | 1.27217900  |
| H | 0.44178300  | -0.56116300 | 2.11355100  |
| H | 1.61321200  | -1.41960100 | -0.58523600 |
| H | 2.49459900  | 0.90928300  | -0.85673500 |
| H | 0.44140800  | 0.56051800  | -2.11362800 |
| F | -1.01634000 | -1.32064000 | -1.17538400 |
| F | -1.01475900 | 1.32129100  | 1.17583000  |

IRC for **TS4**, R/R' = F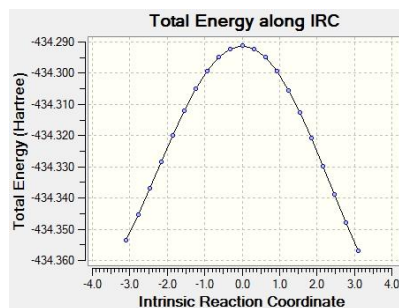Cartesian coordinates for **S5** (R/R' = SiH<sub>3</sub>)

|    |             |             |             |
|----|-------------|-------------|-------------|
| C  | -0.58664900 | -0.58986900 | 0.51595500  |
| C  | 0.58665700  | -0.58985800 | -0.51597200 |
| C  | 0.60732200  | 0.71363100  | -1.35410100 |
| C  | 0.59458600  | 1.98238500  | -0.48634600 |
| C  | -0.59458700 | 1.98237800  | 0.48636800  |
| C  | -0.60732500 | 0.71361000  | 1.35410400  |
| H  | 1.47932400  | 0.71983000  | -2.02015300 |
| H  | 0.44280600  | -1.42976500 | -1.21412000 |
| H  | -0.44279400 | -1.42978500 | 1.21409300  |
| H  | 1.52980200  | 2.05260200  | 0.08634100  |
| H  | 0.55851100  | 2.86970200  | -1.13023400 |
| H  | -0.55851000 | 2.86968300  | 1.13027200  |
| H  | -1.52980200 | 2.05260600  | -0.08631800 |
| H  | 0.27445200  | 0.73291600  | 2.01024900  |
| H  | -1.47933100 | 0.71979600  | 2.02015000  |
| H  | -0.27446000 | 0.73294400  | -2.01023900 |
| Si | -2.27273700 | -1.00967500 | -0.28066400 |
| H  | -2.18476800 | -2.35525800 | -0.91165900 |
| H  | -3.32786000 | -1.04523300 | 0.76950600  |
| H  | -2.70374500 | -0.04611100 | -1.32909100 |
| Si | 2.27273500  | -1.00967900 | 0.28065800  |
| H  | 2.18476700  | -2.35530800 | 0.91155400  |
| H  | 3.32789600  | -1.04514500 | -0.76947800 |
| H  | 2.70369700  | -0.04618000 | 1.32916400  |

Cartesian coordinates for **TS5** (R/R' = SiH<sub>3</sub>)

|    |             |             |             |
|----|-------------|-------------|-------------|
| C  | 0.01572700  | -0.59024900 | -0.68520700 |
| C  | -0.01576800 | -0.59032300 | 0.68508200  |
| C  | 0.02798000  | 0.66919900  | 1.50931900  |
| C  | 0.36342200  | 1.92028700  | 0.67719200  |
| C  | -0.36334400 | 1.92038700  | -0.67705700 |
| C  | -0.02799200 | 0.66935800  | -1.50931500 |
| H  | 0.02268000  | -1.54033800 | -1.20792700 |
| H  | -0.02274200 | -1.54046800 | 1.20770200  |
| H  | 0.76312600  | 0.53100800  | 2.31225500  |
| H  | 1.44577800  | 1.95682400  | 0.50874100  |
| H  | -0.10124400 | 2.81909300  | -1.24600300 |
| H  | -0.76317500 | 0.53127200  | -2.31223600 |
| H  | 0.94268800  | 0.78176200  | -2.01122600 |
| H  | -1.44569900 | 1.95699600  | -0.50861300 |
| H  | 0.10139400  | 2.81895600  | 1.24623000  |
| H  | -0.94271500 | 0.78159800  | 2.01120200  |
| Si | -2.77263100 | -0.95049100 | 0.04526800  |
| H  | -3.63058600 | 0.14420200  | -0.51107900 |
| H  | -3.21670800 | -1.18293400 | 1.45665800  |
| H  | -3.08604300 | -2.19850400 | -0.71928900 |
| Si | 2.77261500  | -0.95052000 | -0.04528700 |
| H  | 3.21668600  | -1.18346800 | -1.45659400 |
| H  | 3.63053200  | 0.14442200  | 0.51063200  |



H 3.08610500 -2.19822800 0.71973400

IRC for **TS5** (R/R' = SiH<sub>3</sub>)

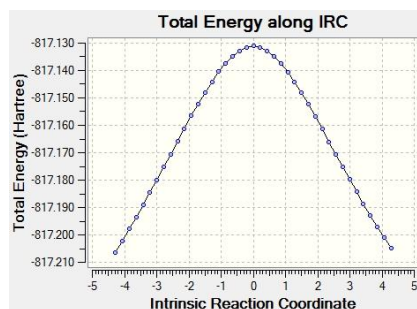

Cartesian coordinates for **S6** (R/R' = PH<sub>2</sub>)

|   |             |             |             |
|---|-------------|-------------|-------------|
| C | -0.58237100 | -0.61504200 | 0.51336000  |
| C | 0.58237200  | -0.61502900 | -0.51338000 |
| C | 0.62773100  | 0.69063900  | -1.34023200 |
| C | 0.60440400  | 1.96034900  | -0.47383700 |
| C | -0.60439600 | 1.96033900  | 0.47388100  |
| C | -0.62773000 | 0.69060700  | 1.34024400  |
| H | 1.51029600  | 0.68759700  | -1.99202500 |
| H | 0.45305300  | -1.45639400 | -1.20316500 |
| H | -0.45305000 | -1.45642300 | 1.20312500  |
| H | 1.52855300  | 2.02897400  | 0.11569200  |
| H | 0.58050600  | 2.84493100  | -1.12161100 |
| H | -0.58049400 | 2.84490400  | 1.12167800  |
| H | -1.52854400 | 2.02898300  | -0.11564700 |
| H | 0.24445000  | 0.70464200  | 2.00785600  |
| H | -1.51029800 | 0.68755200  | 1.99203300  |
| H | -0.24445200 | 0.70469300  | -2.00783900 |
| P | -2.23822500 | -0.90456600 | -0.38947900 |
| H | -2.02689100 | -2.28529300 | -0.67163200 |
| H | -3.01229800 | -1.17141700 | 0.77677500  |
| P | 2.23821900  | -0.90458200 | 0.38946500  |
| H | 2.02688800  | -2.28532300 | 0.67155200  |
| H | 3.01230800  | -1.17137800 | -0.77679300 |

Cartesian coordinates for **TS6** (R/R' = PH<sub>2</sub>)

|   |             |             |             |
|---|-------------|-------------|-------------|
| C | 0.00235700  | -0.56643500 | -0.67316700 |
| C | 0.00316500  | -0.55392300 | 0.70301500  |
| C | 0.04704500  | 0.72192500  | 1.50310100  |
| C | 0.39751100  | 1.95058200  | 0.64590200  |
| C | -0.36952000 | 1.94252700  | -0.68495100 |
| C | -0.05693900 | 0.68358100  | -1.51162500 |
| H | -0.00231700 | -1.52148800 | -1.18527000 |
| H | 0.00620200  | -1.49641900 | 1.23755900  |
| H | 0.76490900  | 0.59842000  | 2.32232400  |
| H | 1.47577100  | 1.95728900  | 0.44556900  |
| H | -0.12495100 | 2.83544400  | -1.27044400 |
| H | -0.81218100 | 0.53826400  | -2.29262200 |
| H | 0.90459000  | 0.78593300  | -2.02984800 |
| H | -1.44700400 | 1.97906500  | -0.48354900 |
| H | 0.17533500  | 2.86375300  | 1.20874300  |
| H | -0.93088800 | 0.85840300  | 1.98341200  |
| P | -2.70669500 | -0.92458600 | -0.01326100 |
| P | 2.69001000  | -0.96767700 | -0.16130100 |
| H | 2.83384700  | -0.51931600 | 1.18617100  |
| H | 2.44446300  | -2.31356700 | 0.24856200  |
| H | -2.46072500 | -2.33105400 | -0.06026700 |
| H | -2.71850100 | -0.92031800 | 1.41443100  |

IRC for **TS6** (R/R' = PH<sub>2</sub>)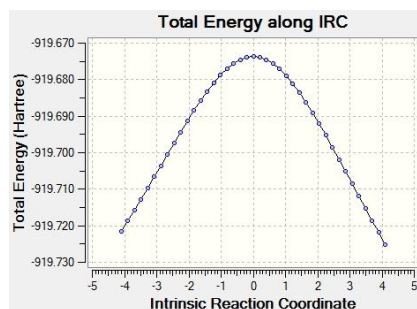Cartesian coordinates for **S7** (R/R' = SH)

|   |             |             |             |
|---|-------------|-------------|-------------|
| C | 0.55703300  | -0.65151000 | -0.51837900 |
| C | -0.58000200 | -0.63308100 | 0.52914600  |
| C | -0.59112900 | 0.66156800  | 1.36020100  |
| C | -0.56171400 | 1.93307800  | 0.49909400  |
| C | 0.61942800  | 1.91410500  | -0.48426800 |
| C | 0.60082000  | 0.64410900  | -1.35027700 |
| H | -1.46293600 | 0.66492000  | 2.02453300  |
| H | -0.46753400 | -1.49601000 | 1.19065500  |
| H | 0.42365800  | -1.50507400 | -1.18804800 |
| H | -1.50132800 | 2.01660400  | -0.06136200 |
| H | -0.50031100 | 2.81321000  | 1.14996200  |
| H | 0.58761100  | 2.79686300  | -1.13369900 |
| H | 1.56430900  | 1.97155400  | 0.07266100  |
| H | -0.29354800 | 0.65893600  | -1.98687400 |
| H | 1.46479800  | 0.61550400  | -2.02285600 |
| H | 0.29652700  | 0.64001700  | 2.00637500  |
| S | 2.21843500  | -0.89822700 | 0.29537400  |
| H | 2.01867800  | -2.18305500 | 0.65256300  |
| S | -2.18395500 | -0.92120700 | -0.39647500 |
| H | -2.94822200 | -1.09213600 | 0.70059900  |

Cartesian coordinates for **TS7** (R/R' = SH)

|   |             |             |             |
|---|-------------|-------------|-------------|
| C | -0.00811800 | -0.62329600 | -0.70877200 |
| C | 0.00810200  | -0.62330000 | 0.70876700  |
| C | 0.06383400  | 0.65219300  | 1.51719000  |
| C | 0.37163000  | 1.90344400  | 0.67258700  |
| C | -0.37163500 | 1.90345200  | -0.67257800 |
| C | -0.06385500 | 0.65220100  | -1.51719000 |
| H | -0.02491200 | -1.56668500 | -1.23484900 |
| H | 0.02492000  | -1.56669000 | 1.23484100  |
| H | 0.81352300  | 0.52206100  | 2.30417900  |
| H | 1.45118600  | 1.96515400  | 0.49200300  |
| H | -0.10579800 | 2.79730200  | -1.24708400 |
| H | -0.81354600 | 0.52207500  | -2.30417700 |
| H | 0.89711400  | 0.76179100  | -2.03165300 |
| H | -1.45119100 | 1.96517700  | -0.49199200 |
| H | 0.10580200  | 2.79729400  | 1.24709400  |
| H | -0.89713700 | 0.76178900  | 2.03164900  |
| H | -2.74059800 | 0.26960400  | 0.12572600  |
| H | 2.74065200  | 0.26960500  | -0.12573800 |
| S | -2.35502700 | -1.02146300 | 0.07163800  |
| S | 2.35504200  | -1.02145200 | -0.07163900 |

IRC for **TS7** (R/R' = SH)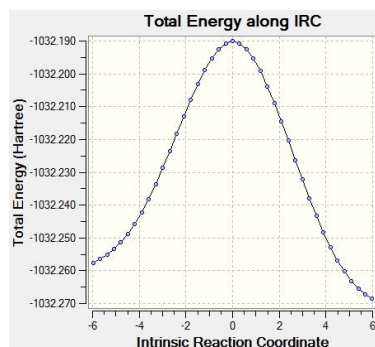Cartesian coordinates for **S8** (R/R' = Cl)

|    |             |             |             |
|----|-------------|-------------|-------------|
| C  | 0.54808300  | -0.65416600 | -0.53838200 |
| C  | -0.54807300 | -0.65417600 | 0.53838200  |
| C  | -0.59242400 | 0.63460800  | 1.36064400  |
| C  | -0.58890400 | 1.90286000  | 0.49402700  |
| C  | 0.58887900  | 1.90287400  | -0.49402100 |
| C  | 0.59241500  | 0.63462200  | -1.36064000 |
| H  | -1.46375600 | 0.60898700  | 2.02236700  |
| H  | -0.44292800 | -1.52931500 | 1.17956900  |
| H  | 0.44294600  | -1.52930200 | -1.17957400 |
| H  | -1.53482300 | 1.97037500  | -0.05779300 |
| H  | -0.53959100 | 2.78407000  | 1.14371200  |
| H  | 0.53954200  | 2.78408500  | -1.14370200 |
| H  | 1.53479900  | 1.97040500  | 0.05779300  |
| H  | -0.29755000 | 0.62609600  | -2.00356800 |
| H  | 1.46373900  | 0.60901200  | -2.02237400 |
| H  | 0.29753200  | 0.62609100  | 2.00358300  |
| Cl | -2.15885200 | -0.92707300 | -0.32063500 |
| Cl | 2.15886600  | -0.92705800 | 0.32063000  |

Cartesian coordinates for **TS8** (R/R' = Cl)

|    |             |             |             |
|----|-------------|-------------|-------------|
| C  | -0.01162500 | -0.63733800 | -0.71684400 |
| C  | 0.01161400  | -0.63734100 | 0.71684100  |
| C  | 0.07680100  | 0.63320600  | 1.51418200  |
| C  | 0.39159400  | 1.87496600  | 0.66082200  |
| C  | -0.39157400 | 1.87497500  | -0.66081600 |
| C  | -0.07680000 | 0.63321400  | -1.51417900 |
| H  | -0.02649900 | -1.58937200 | -1.22886100 |
| H  | 0.02648200  | -1.58937800 | 1.22885300  |
| H  | 0.82280900  | 0.49382000  | 2.30354100  |
| H  | 1.46671900  | 1.90087300  | 0.45340200  |
| H  | -0.15270700 | 2.77298300  | -1.23976500 |
| H  | -0.82281100 | 0.49384100  | -2.30353700 |
| Cl | 2.25463200  | -0.91424800 | -0.08570000 |
| Cl | -2.25463800 | -0.91423600 | 0.08569700  |
| H  | 0.89023400  | 0.73874700  | -2.01954500 |
| H  | -1.46669900 | 1.90090500  | -0.45339800 |
| H  | 0.15274600  | 2.77297600  | 1.23977500  |
| H  | -0.89023300 | 0.73874900  | 2.01954400  |

IRC for **TS8** (R/R' = Cl)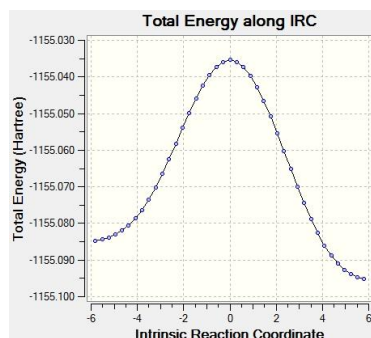Cartesian coordinates for **S9** (R/R' = CH<sub>2</sub>CH<sub>3</sub>)

|   |             |             |             |
|---|-------------|-------------|-------------|
| C | 0.70376300  | -0.59073200 | -0.33282300 |
| C | -0.70374500 | -0.59075700 | 0.33280000  |
| C | -0.92910800 | 0.70529400  | 1.14865800  |
| C | -0.69598700 | 1.98352200  | 0.32553700  |
| C | 0.69594600  | 1.98354600  | -0.32548500 |
| C | 0.92909200  | 0.70534800  | -1.14864400 |
| H | -1.93835500 | 0.71115600  | 1.57662400  |
| H | -0.72685600 | -1.43331300 | 1.04105400  |
| H | 0.72688900  | -1.43326900 | -1.04110000 |
| H | -1.46162200 | 2.06965100  | -0.45793700 |
| H | -0.81586700 | 2.86527800  | 0.96754600  |
| H | 0.81580700  | 2.86532400  | -0.96746800 |
| H | 1.46158000  | 2.06966700  | 0.45799100  |
| H | 0.24367700  | 0.70884400  | -2.00687200 |
| H | 1.93833300  | 0.71124700  | -1.57662200 |
| H | -0.24370200 | 0.70878100  | 2.00689300  |
| C | 1.82497500  | -0.86423000 | 0.69663400  |
| H | 1.52660000  | -1.73338000 | 1.29868500  |
| H | 1.91274900  | -0.02844700 | 1.40170300  |
| C | -1.82495700 | -0.86424000 | -0.69666100 |
| H | -1.52658700 | -1.73337800 | -1.29873100 |
| H | -1.91273500 | -0.02844100 | -1.40170800 |
| C | -3.20187400 | -1.14764400 | -0.08095900 |
| C | 3.20189700  | -1.14763000 | 0.08094100  |
| H | 3.92658100  | -1.42133400 | 0.85565400  |
| H | 3.15151400  | -1.97762500 | -0.63452800 |
| H | 3.60545200  | -0.27831000 | -0.44876800 |
| H | -3.60540700 | -0.27833800 | 0.44879000  |
| H | -3.92657400 | -1.42130700 | -0.85567200 |
| H | -3.15149100 | -1.97766700 | 0.63447600  |

Cartesian coordinates for **TS9** (R/R' = CH<sub>2</sub>CH<sub>3</sub>)

|   |             |             |             |
|---|-------------|-------------|-------------|
| C | 0.20799300  | -0.57020800 | 0.37791900  |
| C | 0.27267000  | -0.21765500 | -0.93596000 |
| C | -0.11336300 | 1.14671600  | -1.43853000 |
| C | -0.89979100 | 1.95764000  | -0.39588900 |
| C | -0.25829700 | 1.84408000  | 0.99482400  |
| C | -0.19451600 | 0.38126800  | 1.46759900  |
| H | 0.46906400  | -1.58417400 | 0.66055200  |
| H | 0.59388900  | -0.95818500 | -1.66072500 |
| H | -0.69500000 | 1.03322000  | -2.36106500 |
| H | -1.92940500 | 1.58280000  | -0.35362300 |
| H | -0.81581200 | 2.44367100  | 1.72325400  |
| H | 0.50678100  | 0.27583400  | 2.30472200  |
| H | -1.16998000 | 0.05826500  | 1.85546000  |
| H | 0.75751300  | 2.25634400  | 0.95668500  |
| H | -0.95403900 | 3.00717300  | -0.70663200 |

|   |             |             |             |
|---|-------------|-------------|-------------|
| H | 0.80459500  | 1.67874100  | -1.72437800 |
| C | 2.60805900  | 0.00748200  | -0.07387300 |
| H | 2.67000200  | 0.71574900  | 0.75328300  |
| H | 2.82353400  | 0.47696400  | -1.03493200 |
| C | -1.94131000 | -1.43611800 | -0.70465300 |
| H | -2.27065800 | -0.87517400 | -1.58154600 |
| H | -1.51043700 | -2.40219500 | -0.97436800 |
| C | -2.92280500 | -1.46694600 | 0.43861900  |
| C | 3.24775400  | -1.33726300 | 0.14744800  |
| H | -3.84850500 | -2.02013700 | 0.19580800  |
| H | -2.50377100 | -1.95393600 | 1.32956400  |
| H | -3.24151500 | -0.45841000 | 0.73388800  |
| H | 2.95188600  | -2.06166100 | -0.62539800 |
| H | 4.35086300  | -1.30233100 | 0.12500500  |
| H | 2.97264000  | -1.76653800 | 1.11942600  |

IRC for **TS9** (R/R' = CH<sub>2</sub>CH<sub>3</sub>)

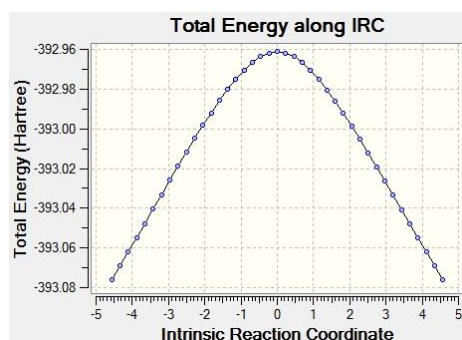

Cartesian coordinates for **S10** (R/R' = CH(CH<sub>3</sub>)<sub>2</sub>)

|   |             |             |             |
|---|-------------|-------------|-------------|
| C | -0.64018000 | -0.25926300 | 0.65998000  |
| C | 0.51477300  | -0.21855900 | -0.39601700 |
| C | 0.53525200  | 1.12481800  | -1.16756400 |
| C | 0.57239400  | 2.36006500  | -0.25755700 |
| C | -0.64782400 | 2.36815500  | 0.67164300  |
| C | -0.72750900 | 1.06121800  | 1.47622600  |
| H | 1.37541600  | 1.13872500  | -1.86899200 |
| H | 0.32514100  | -1.00341400 | -1.14316500 |
| H | -0.35912900 | -1.01712500 | 1.40147800  |
| H | 1.49164600  | 2.36198700  | 0.34551200  |
| H | 0.59807400  | 3.27299000  | -0.86580500 |
| H | -0.60094400 | 3.21853000  | 1.36397100  |
| H | -1.55536100 | 2.51047900  | 0.07144900  |
| H | 0.10393100  | 1.06918200  | 2.19508100  |
| H | -1.64241700 | 1.04458100  | 2.08320500  |
| H | -0.36622200 | 1.18756700  | -1.78712000 |
| C | -2.02064000 | -0.77797800 | 0.14102800  |
| C | 1.88476900  | -0.58882800 | 0.26537100  |
| C | -1.97806900 | -2.29221300 | -0.13934400 |
| C | -2.64200500 | -0.05345900 | -1.06646900 |
| C | 3.11139200  | -0.22487100 | -0.58989800 |
| C | 1.95238100  | -2.09168600 | 0.59946800  |
| H | -2.74660500 | 1.02250500  | -0.90431000 |
| H | -2.05076400 | -0.20357300 | -1.97676800 |
| H | -3.64336100 | -0.45404800 | -1.26357900 |
| H | -2.97592300 | -2.66704000 | -0.39418500 |
| H | -1.31629900 | -2.53186500 | -0.97991800 |
| H | -1.62412700 | -2.85312800 | 0.73299600  |
| H | 3.22403100  | 0.85373000  | -0.73080000 |
| H | 4.02715300  | -0.58828400 | -0.10997800 |
| H | 3.05478900  | -0.69055200 | -1.58239100 |
| H | 1.94543500  | -2.68915100 | -0.32133800 |
| H | 2.87528900  | -2.32888500 | 1.14057900  |

|   |             |             |            |
|---|-------------|-------------|------------|
| H | 1.11522700  | -2.42843800 | 1.21757800 |
| H | -2.71258900 | -0.63631300 | 0.98511900 |
| H | 1.96921100  | -0.03285200 | 1.21017800 |

Cartesian coordinates for **TS10** (R/R' = CH(CH<sub>3</sub>)<sub>2</sub>)

|   |             |             |             |
|---|-------------|-------------|-------------|
| C | -0.00388500 | -0.14302600 | 0.67674900  |
| C | 0.00393800  | -0.14315300 | -0.67666700 |
| C | -0.02190100 | 1.11400400  | -1.50110900 |
| C | -0.36701400 | 2.36493500  | -0.67451000 |
| C | 0.36654800  | 2.36516700  | 0.67414900  |
| C | 0.02180800  | 1.11427300  | 1.50097800  |
| H | -0.00981500 | -1.09100500 | 1.20500000  |
| H | 0.00997100  | -1.09122500 | -1.20474400 |
| H | -0.73798800 | 0.98785400  | -2.32319700 |
| H | -1.44926700 | 2.39228800  | -0.49701300 |
| H | 0.11811400  | 3.26783700  | 1.24411800  |
| H | 0.73804100  | 0.98839300  | 2.32298100  |
| H | -0.96076800 | 1.23179700  | 1.98139700  |
| H | 1.44879600  | 2.39282500  | 0.49665900  |
| H | -0.11885100 | 3.26757900  | -1.24463900 |
| H | 0.96072400  | 1.23167700  | -1.98139400 |
| C | 2.58480900  | -0.53068400 | -0.03328500 |
| C | -2.58470400 | -0.53086600 | 0.03330200  |
| C | -2.84650700 | -1.26597300 | 1.31321500  |
| C | -2.86860800 | -1.27478900 | -1.23679100 |
| C | 2.86885100  | -1.27428100 | 1.23696000  |
| C | 2.84664200  | -1.26606200 | -1.31303000 |
| H | -3.93180100 | -1.57795800 | -1.31464000 |
| H | -2.64396500 | -0.68167200 | -2.13040800 |
| H | -2.29043700 | -2.20966100 | -1.29925900 |
| H | -3.91109500 | -1.55594200 | 1.41706800  |
| H | -2.27775800 | -2.20707100 | 1.36633600  |
| H | -2.59491800 | -0.67240800 | 2.19982000  |
| H | 2.29074200  | -2.20917400 | 1.29967200  |
| H | 3.93207000  | -1.57736200 | 1.31480900  |
| H | 2.64422500  | -0.68098600 | 2.13046200  |
| H | 2.59492100  | -0.67277700 | -2.19978400 |
| H | 3.91126400  | -1.55590500 | -1.41688000 |
| H | 2.27802200  | -2.20725500 | -1.36588000 |
| H | -2.84894700 | 0.52632600  | 0.03283000  |
| H | 2.84885900  | 0.52655400  | -0.03309200 |

IRC for **TS10** [R/R' = CH(CH<sub>3</sub>)<sub>2</sub>]

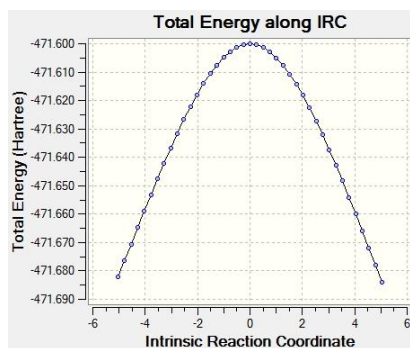

Cartesian coordinates for **S11** [R/R' = C(CH<sub>3</sub>)<sub>3</sub>]

|   |             |             |             |
|---|-------------|-------------|-------------|
| C | -0.60701800 | -0.10517100 | 0.50041000  |
| C | 0.60701400  | -0.10518800 | -0.50040600 |
| C | 0.74173300  | 1.24916900  | -1.25703700 |
| C | 0.64832800  | 2.52373800  | -0.40700900 |
| C | -0.64827800 | 2.52372100  | 0.40702500  |

|   |             |             |             |
|---|-------------|-------------|-------------|
| C | -0.74172600 | 1.24916000  | 1.25705600  |
| H | 1.66291300  | 1.25711900  | -1.84581500 |
| H | 0.37039000  | -0.83078200 | -1.28861900 |
| H | -0.37041600 | -0.83077500 | 1.28861200  |
| H | 1.50576400  | 2.60567500  | 0.27270000  |
| H | 0.69148600  | 3.40167200  | -1.06436800 |
| H | -0.69147200 | 3.40164100  | 1.06439900  |
| H | -1.50570900 | 2.60565100  | -0.27270900 |
| H | 0.06937900  | 1.29756800  | 1.99337900  |
| H | -1.66292300 | 1.25716900  | 1.84580100  |
| H | -0.06938900 | 1.29762600  | -1.99332900 |
| C | -1.95272300 | -0.68660400 | -0.10484500 |
| C | 1.95269600  | -0.68662600 | 0.10483800  |
| C | -1.76742900 | -2.19534900 | -0.39582400 |
| C | -3.09678900 | -0.57409100 | 0.92976600  |
| C | -2.42298400 | -0.00797300 | -1.40989400 |
| C | 3.09673700  | -0.57401500 | -0.92977500 |
| C | 1.76750400  | -2.19539500 | 0.39577600  |
| C | 2.42294200  | -0.00802300 | 1.40992300  |
| H | -3.96401700 | -1.15304300 | 0.59192600  |
| H | -2.79569300 | -0.96963900 | 1.90748900  |
| H | -3.43330900 | 0.45748800  | 1.07110200  |
| H | -2.59899800 | 1.06350100  | -1.27939000 |
| H | -1.70369400 | -0.13847800 | -2.22441400 |
| H | -3.36778600 | -0.45666200 | -1.74000400 |
| H | -2.69805800 | -2.62078300 | -0.78846600 |
| H | -0.98526700 | -2.38877200 | -1.13581800 |
| H | -1.50897800 | -2.74696600 | 0.51540600  |
| H | 3.43311400  | 0.45759700  | -1.07114700 |
| H | 3.96402800  | -1.15285000 | -0.59190500 |
| H | 2.79568500  | -0.96963900 | -1.90748100 |
| H | 1.50896500  | -2.74699300 | -0.51543600 |
| H | 2.69819800  | -2.62080000 | 0.78829300  |
| H | 0.98544800  | -2.38886100 | 1.13586500  |
| H | 1.70332500  | -0.13799000 | 2.22424700  |
| H | 3.36742400  | -0.45713400 | 1.74036300  |
| H | 2.59954900  | 1.06333600  | 1.27929700  |

Cartesian coordinates for **TS11** [R/R' = C(CH<sub>3</sub>)<sub>3</sub>]

|   |             |             |             |
|---|-------------|-------------|-------------|
| C | 0.00528100  | 0.00663000  | -0.67338300 |
| C | -0.00539600 | 0.00591000  | 0.67191000  |
| C | 0.00086700  | 1.26324600  | 1.50132500  |
| C | 0.36208600  | 2.51132900  | 0.67789500  |
| C | -0.36100700 | 2.51226000  | -0.67666600 |
| C | -0.00069200 | 1.26482400  | -1.50148600 |
| H | 0.01668900  | -0.93905200 | -1.20695000 |
| H | -0.01700800 | -0.94032700 | 1.20448100  |
| H | 0.70031900  | 1.14429000  | 2.33962100  |
| H | 1.44591100  | 2.52836900  | 0.50699600  |
| H | -0.11615100 | 3.41949300  | -1.24158600 |
| H | -0.70050400 | 1.14706300  | -2.33965600 |
| H | 0.99119200  | 1.38902400  | -1.96387500 |
| H | -1.44478400 | 2.52980200  | -0.50548600 |
| H | 0.11767500  | 3.41811700  | 1.24372500  |
| H | -0.99113200 | 1.38748200  | 1.96345500  |
| C | -2.91535800 | -0.83231000 | 0.01851800  |
| C | 2.91518500  | -0.83265500 | -0.01861300 |
| C | 3.67174400  | 0.45366400  | -0.01886600 |
| C | 2.87924800  | -1.60896700 | -1.29270500 |
| C | 2.88402400  | -1.61619400 | 1.25122300  |
| C | -2.88370000 | -1.61944900 | -1.24907100 |
| C | -2.88061200 | -1.60515100 | 1.29476000  |
| C | -3.67156000 | 0.45421700  | 0.01483500  |

|   |             |             |             |
|---|-------------|-------------|-------------|
| H | 3.84379300  | -2.15061100 | 1.42453000  |
| H | 2.72475200  | -0.97915000 | 2.12961800  |
| H | 2.10661100  | -2.39140000 | 1.24031700  |
| H | 3.84082100  | -2.13711100 | -1.47491000 |
| H | 2.10575100  | -2.38802600 | -1.28183400 |
| H | 2.71190900  | -0.96770400 | -2.16667300 |
| H | 4.77067100  | 0.28089400  | -0.04624500 |
| H | 3.44134700  | 1.07004400  | -0.89678800 |
| H | 3.47930500  | 1.04719000  | 0.88269100  |
| H | -2.10602900 | -2.39437900 | -1.23577400 |
| H | -3.84324100 | -2.15472100 | -1.42099500 |
| H | -2.72445600 | -0.98489600 | -2.12925800 |
| H | -2.71360000 | -0.96158800 | 2.16709600  |
| H | -3.84254800 | -2.13237100 | 1.47772500  |
| H | -2.10744800 | -2.38457000 | 1.28655500  |
| H | -3.47900400 | 1.04496700  | -0.88852400 |
| H | -4.77053200 | 0.28182100  | 0.04282900  |
| H | -3.44096900 | 1.07322400  | 0.89085800  |

IRC for **TS11** [R/R' = C(CH<sub>3</sub>)<sub>3</sub>]

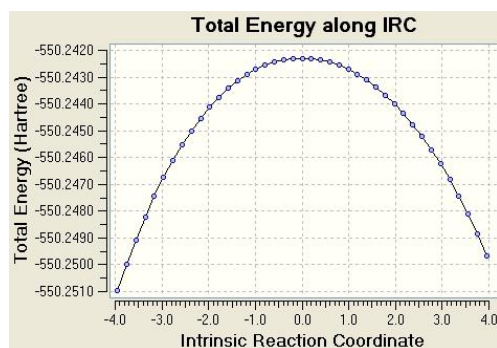

Cartesian coordinates for **S12** (R/R' = CH<sub>2</sub>CHCH<sub>2</sub>)

|   |             |             |             |
|---|-------------|-------------|-------------|
| C | -0.68669900 | -0.55396200 | 0.36402900  |
| C | 0.68670200  | -0.55396000 | -0.36402400 |
| C | 0.89355500  | 0.74242100  | -1.18115700 |
| C | 0.68502800  | 2.01819800  | -0.34775000 |
| C | -0.68503900 | 2.01819400  | 0.34775000  |
| C | -0.89355700 | 0.74241800  | 1.18116000  |
| H | 1.89649500  | 0.74060800  | -1.62366700 |
| H | 0.68019900  | -1.39589000 | -1.07295100 |
| H | -0.68019300 | -1.39589200 | 1.07295600  |
| H | 1.47627000  | 2.10328500  | 0.40967600  |
| H | 0.78508900  | 2.90044700  | -0.99218700 |
| H | -0.78510500 | 2.90044400  | 0.99218500  |
| H | -1.47628200 | 2.10327400  | -0.40967600 |
| H | -0.18799000 | 0.75002300  | 2.02294800  |
| H | -1.89649600 | 0.74060000  | 1.62367200  |
| H | 0.18799000  | 0.75002200  | -2.02294600 |
| C | -1.85495100 | -0.82784800 | -0.62008200 |
| C | 1.85495600  | -0.82784100 | 0.62008500  |
| C | -3.16605600 | -1.10705100 | 0.06368100  |
| C | 3.16605800  | -1.10705100 | -0.06367900 |
| C | 4.31355000  | -0.45702900 | 0.15441700  |
| C | -4.31354800 | -0.45703300 | -0.15442900 |
| H | -1.98196500 | 0.00231600  | -1.32423600 |
| H | -1.58303700 | -1.70724200 | -1.22312100 |
| H | -3.15565000 | -1.92061900 | 0.79210700  |
| H | -5.22797700 | -0.72292600 | 0.36830000  |
| H | -4.37810400 | 0.36162800  | -0.86825100 |
| H | 1.58304300  | -1.70723000 | 1.22313100  |
| H | 1.98197400  | 0.00232800  | 1.32423300  |



|   |            |             |             |
|---|------------|-------------|-------------|
| H | 3.15565000 | -1.92063000 | -0.79209400 |
| H | 4.37811000 | 0.36164100  | 0.86822900  |
| H | 5.22797800 | -0.72292900 | -0.36831300 |

Cartesian coordinates for **TS12** (R/R' = CH<sub>2</sub>CHCH<sub>2</sub>)

|   |             |             |             |
|---|-------------|-------------|-------------|
| C | 0.06991900  | -0.38048600 | -0.54761900 |
| C | 0.11116100  | 0.82639500  | -1.15844700 |
| C | -0.06972100 | 2.12961300  | -0.42552500 |
| C | -0.58129600 | 1.92647700  | 1.01157900  |
| C | 0.14546200  | 0.76309700  | 1.70247600  |
| C | -0.04744000 | -0.55533500 | 0.93291500  |
| H | 0.19305100  | -1.27755500 | -1.14790900 |
| H | 0.23287900  | 0.87078900  | -2.23808700 |
| H | -0.76128500 | 2.76946300  | -0.99027800 |
| H | -1.65598900 | 1.70900400  | 0.98193900  |
| H | -0.20945800 | 0.64953200  | 2.73315100  |
| H | 0.68825100  | -1.30385800 | 1.25995900  |
| H | -1.03900500 | -0.99067600 | 1.15896800  |
| H | 1.21768400  | 0.99281100  | 1.76255000  |
| H | -0.45974800 | 2.85231800  | 1.58579000  |
| H | 0.88789500  | 2.67303600  | -0.41805100 |
| C | 3.02935700  | 0.29503200  | -0.92694900 |
| H | 2.95759400  | 0.57131800  | -1.97184300 |
| H | 2.97356900  | 1.09515800  | -0.19631300 |
| C | -2.72439100 | -0.55908900 | -1.47279700 |
| H | -2.73876000 | 0.29808200  | -2.13509600 |
| H | -2.28380400 | -1.47346200 | -1.85676200 |
| C | 3.37290500  | -1.00521900 | -0.54425500 |
| H | 3.46436500  | -1.74480400 | -1.34076300 |
| C | 3.58938300  | -1.43854900 | 0.74610000  |
| H | 3.85735900  | -2.46755700 | 0.95883500  |
| H | 3.53227700  | -0.75536300 | 1.58913400  |
| C | -3.39677400 | -0.54217300 | -0.25142700 |
| H | -3.87307500 | 0.39571000  | 0.03670700  |
| C | -3.48312800 | -1.59329700 | 0.64073200  |
| H | -3.04722500 | -2.56265200 | 0.41449000  |
| H | -4.02919800 | -1.50009700 | 1.57288800  |

Cartesian coordinates for **S13** [R/R' = Si(CH<sub>3</sub>)<sub>3</sub>]

|    |             |             |             |
|----|-------------|-------------|-------------|
| C  | -0.55627900 | -0.00255200 | 0.55174800  |
| C  | 0.55629000  | -0.00252200 | -0.55182700 |
| C  | 0.55451700  | 1.31464000  | -1.37090700 |
| C  | 0.58013000  | 2.58134200  | -0.50253100 |
| C  | -0.57997100 | 2.58132900  | 0.50271200  |
| C  | -0.55442400 | 1.31453600  | 1.37096000  |
| H  | 1.39702400  | 1.32303100  | -2.07303300 |
| H  | 0.32415700  | -0.80912200 | -1.26829300 |
| H  | -0.32418100 | -0.80922400 | 1.26814500  |
| H  | 1.53095700  | 2.64576300  | 0.04450200  |
| H  | 0.53034500  | 3.47061000  | -1.14360900 |
| H  | -0.53012000 | 3.47052800  | 1.14388200  |
| H  | -1.53080000 | 2.64586500  | -0.04429800 |
| H  | 0.35111900  | 1.35255000  | 1.99178500  |
| H  | -1.39691400 | 1.32290500  | 2.07310400  |
| H  | -0.35100800 | 1.35276400  | -1.99175300 |
| Si | -2.28483400 | -0.58475800 | -0.06241800 |
| Si | 2.28478600  | -0.58489800 | 0.06236400  |
| C  | -3.53188600 | -0.44412700 | 1.36248900  |
| C  | -2.13486700 | -2.41561900 | -0.54386100 |
| C  | -2.98658800 | 0.34597400  | -1.56187100 |
| C  | 2.13458200  | -2.41576900 | 0.54366900  |
| C  | 2.98662500  | 0.34563900  | 1.56190300  |

|   |             |             |             |
|---|-------------|-------------|-------------|
| C | 3.53196300  | -0.44402400 | -1.36241100 |
| H | -3.75105300 | 0.59942400  | 1.61480100  |
| H | -4.48001500 | -0.92204200 | 1.08815600  |
| H | -3.16555900 | -0.93631000 | 2.27130200  |
| H | -1.78811000 | -3.02620300 | 0.29805400  |
| H | -3.10736800 | -2.81057800 | -0.86098500 |
| H | -1.43447600 | -2.56676900 | -1.37333500 |
| H | -2.34452600 | 0.24670000  | -2.44386300 |
| H | -3.96755800 | -0.07027600 | -1.82329400 |
| H | -3.12365800 | 1.41470200  | -1.36628800 |
| H | 3.96756600  | -0.07074700 | 1.82323300  |
| H | 3.12383600  | 1.41435200  | 1.36632300  |
| H | 2.34463500  | 0.24644600  | 2.44395200  |
| H | 3.10705400  | -2.81095900 | 0.86058900  |
| H | 1.43433600  | -2.56673600 | 1.37330500  |
| H | 1.78748100  | -3.02627700 | -0.29815600 |
| H | 4.48008200  | -0.92197600 | -1.08811100 |
| H | 3.16576600  | -0.93593700 | -2.27141900 |
| H | 3.75112100  | 0.59961600  | -1.61438000 |

Cartesian coordinates for **TS13** [R/R' = Si(CH<sub>3</sub>)<sub>3</sub>]

|    |             |             |             |
|----|-------------|-------------|-------------|
| C  | -0.01933600 | -0.06540000 | 0.66312900  |
| C  | 0.02552100  | -0.05263700 | -0.69762600 |
| C  | -0.01553800 | 1.21251300  | -1.51259100 |
| C  | -0.36221100 | 2.45326700  | -0.67013000 |
| C  | 0.36364900  | 2.44203400  | 0.68420000  |
| C  | 0.02186600  | 1.18377500  | 1.50231700  |
| H  | -0.03187000 | -1.01950500 | 1.17921600  |
| H  | 0.03552500  | -0.99668300 | -1.23151200 |
| H  | -0.74786600 | 1.08192900  | -2.32003200 |
| H  | -1.44489600 | 2.47581500  | -0.49967300 |
| H  | 0.10506800  | 3.33799700  | 1.26026000  |
| H  | 0.75544200  | 1.03949500  | 2.30649000  |
| H  | -0.95074400 | 1.29781400  | 2.00045900  |
| H  | 1.44592000  | 2.47432800  | 0.51403200  |
| H  | -0.10908400 | 3.36160900  | -1.22889800 |
| H  | 0.95768100  | 1.33954500  | -2.00688500 |
| Si | 2.89415200  | -0.52869300 | -0.01845200 |
| Si | -2.89449200 | -0.53003100 | 0.00666500  |
| C  | 4.14686900  | 0.84919200  | 0.42386300  |
| C  | 3.39676500  | -1.23032200 | -1.72692900 |
| C  | 3.11798200  | -1.93915000 | 1.25527600  |
| C  | -3.01804000 | -2.32343400 | -0.64843000 |
| C  | -3.58929600 | -0.53347800 | 1.79054300  |
| C  | -4.06380900 | 0.54943800  | -1.05780500 |
| H  | 2.46604000  | -2.79139700 | 1.03150100  |
| H  | 4.15530200  | -2.30519300 | 1.24861000  |
| H  | 2.89119000  | -1.60398000 | 2.27380400  |
| H  | 3.34011500  | -0.46724800 | -2.51137400 |
| H  | 4.43160000  | -1.60270100 | -1.69934100 |
| H  | 2.75285900  | -2.06512800 | -2.02627800 |
| H  | 3.95157700  | 1.26987200  | 1.41646500  |
| H  | 5.17134900  | 0.44733900  | 0.42732900  |
| H  | 4.11437600  | 1.67071900  | -0.30029000 |
| H  | -4.05506100 | -2.68550600 | -0.58951600 |
| H  | -2.70143700 | -2.39331400 | -1.69535000 |
| H  | -2.39504900 | -3.01109400 | -0.06496400 |
| H  | -4.61663000 | -0.92733000 | 1.80069900  |
| H  | -2.98791000 | -1.16051400 | 2.45858000  |
| H  | -3.61814900 | 0.47595200  | 2.21606900  |
| H  | -5.09346500 | 0.16482500  | -1.00348200 |
| H  | -4.07934000 | 1.58961700  | -0.71406300 |
| H  | -3.76432200 | 0.55007200  | -2.11174500 |

IRC for **TS13** [R/R' = Si(CH<sub>3</sub>)<sub>3</sub>]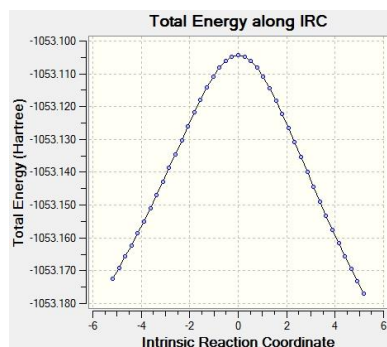Cartesian coordinates for **S14** [R/R' = P(CH<sub>3</sub>)<sub>2</sub>]

|   |             |             |             |
|---|-------------|-------------|-------------|
| C | 0.71509900  | 0.01124200  | -0.48654500 |
| C | -0.53808700 | -0.33462700 | 0.36851100  |
| C | -0.82271700 | 0.73220600  | 1.45334000  |
| C | -0.78594200 | 2.18707800  | 0.95201000  |
| C | 0.49222600  | 2.48614300  | 0.15691500  |
| C | 0.67450900  | 1.47271400  | -0.98270800 |
| H | -1.78477700 | 0.52812200  | 1.93978400  |
| H | -0.33025200 | -1.27559100 | 0.89741200  |
| H | 0.72902000  | -0.64907600 | -1.36502400 |
| H | -1.65518400 | 2.39407000  | 0.31734200  |
| H | -0.86443600 | 2.86396700  | 1.81204900  |
| H | 0.45362000  | 3.50397100  | -0.25067900 |
| H | -0.16299300 | 1.57474000  | -1.68864000 |
| H | 1.57648500  | 1.70320400  | -1.56066000 |
| H | -0.06036000 | 0.62324100  | 2.23677900  |
| P | 2.31175100  | -0.37510400 | 0.47746700  |
| P | -1.97947500 | -0.92765100 | -0.73263200 |
| C | 3.58616300  | -0.05842700 | -0.85198400 |
| C | 2.28557300  | -2.24130200 | 0.37400800  |
| C | -2.96960500 | -1.86507400 | 0.54535800  |
| C | -3.13830400 | 0.52373400  | -0.94119600 |
| H | 3.24764800  | -2.62488600 | 0.72880200  |
| H | 1.51120600  | -2.65203400 | 1.02821700  |
| H | 2.11643600  | -2.60590000 | -0.64676200 |
| H | 4.53507900  | -0.50443900 | -0.53662100 |
| H | 3.30225300  | -0.48947900 | -1.82032100 |
| H | 3.75454800  | 1.01476200  | -0.97689300 |
| H | -2.69117400 | 1.28742900  | -1.58310100 |
| H | -4.03590200 | 0.15262100  | -1.44774300 |
| H | -3.44255500 | 0.98346600  | 0.00542500  |
| H | -3.19785300 | -1.26654800 | 1.43530600  |
| H | -3.91361100 | -2.18801400 | 0.09473400  |
| H | -2.42503400 | -2.76306100 | 0.85331900  |
| H | 1.36019400  | 2.44862200  | 0.82848900  |

Cartesian coordinates for **TS14** [R/R' = P(CH<sub>3</sub>)<sub>2</sub>]

|   |             |             |             |
|---|-------------|-------------|-------------|
| C | 0.01325000  | 0.11844800  | -0.91742500 |
| C | -0.02105300 | 0.08600200  | 0.44313000  |
| C | 0.01668800  | 1.32776300  | 1.29186300  |
| C | 0.38939600  | 2.58293200  | 0.48464500  |
| C | -0.35710100 | 2.62065700  | -0.85690700 |
| C | -0.02046900 | 1.39064400  | -1.71622100 |
| H | 0.02196200  | -0.81975600 | -1.46338500 |
| H | -0.03122500 | -0.87591400 | 0.94920900  |
| H | 0.72472100  | 1.17290000  | 2.11542700  |
| H | 1.47022700  | 2.58298000  | 0.29760400  |
| H | -0.11023800 | 3.53543500  | -1.40707800 |

|   |             |             |             |
|---|-------------|-------------|-------------|
| H | -0.75280900 | 1.27401200  | -2.52488600 |
| H | 0.95710100  | 1.51126100  | -2.20359900 |
| H | -1.43827500 | 2.63926900  | -0.67183300 |
| H | 0.16653000  | 3.47997000  | 1.07325600  |
| H | -0.96552900 | 1.45610600  | 1.76771000  |
| P | -2.81026100 | -0.40051700 | -0.25571700 |
| P | 2.80831200  | -0.40015200 | -0.29472600 |
| C | -2.47063700 | -2.20114100 | -0.63858800 |
| C | -3.12750300 | -0.58172900 | 1.58386000  |
| C | 2.48551400  | -2.20006300 | -0.69479200 |
| C | 3.09834300  | -0.59516700 | 1.54782700  |
| H | 1.61423700  | -2.60770300 | -0.16078400 |
| H | 2.31571800  | -2.31692600 | -1.76975600 |
| H | 3.35279700  | -2.81548700 | -0.42517700 |
| H | 3.25899600  | 0.38615500  | 2.00470300  |
| H | 2.26855900  | -1.09233400 | 2.06768200  |
| H | 4.00140800  | -1.19467900 | 1.72102800  |
| H | -1.60294200 | -2.60027700 | -0.09224000 |
| H | -3.33713800 | -2.82032200 | -0.37531700 |
| H | -2.28761800 | -2.32394600 | -1.71069600 |
| H | -3.31496800 | 0.40129400  | 2.02653500  |
| H | -4.02247200 | -1.19559400 | 1.74865600  |
| H | -2.29837900 | -1.05647300 | 2.12524200  |

IRC for **TS14** [R/R' = P(CH<sub>3</sub>)<sub>2</sub>]

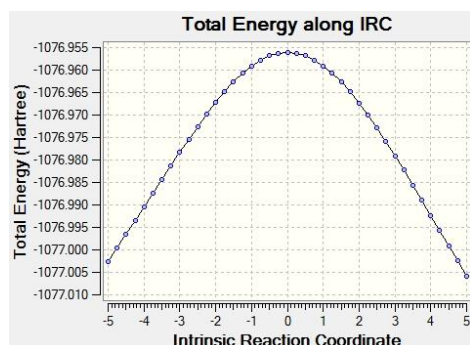

Cartesian coordinates for **S15** (R/R' = OCH<sub>3</sub>)

|   |             |             |             |
|---|-------------|-------------|-------------|
| C | -0.47189700 | -0.62164400 | 0.24651900  |
| C | 0.78449500  | -0.30531100 | -0.59617400 |
| C | 0.70173600  | 1.08721900  | -1.22775100 |
| C | 0.42960400  | 2.18636200  | -0.18837900 |
| C | -0.83724500 | 1.87597900  | 0.62446400  |
| C | -0.74793800 | 0.48652000  | 1.27515100  |
| H | 1.63657100  | 1.28124700  | -1.76583100 |
| H | 0.86456500  | -1.06455000 | -1.38852100 |
| H | -0.31971900 | -1.57863900 | 0.77200000  |
| H | 1.28985900  | 2.26623400  | 0.48804900  |
| H | 0.33001300  | 3.15525800  | -0.69272100 |
| H | -0.99075600 | 2.63781200  | 1.39854000  |
| H | -1.71354200 | 1.91237200  | -0.03583100 |
| H | 0.07567800  | 0.47135300  | 2.00023400  |
| H | -1.66192400 | 0.25867600  | 1.83686600  |
| H | -0.10818500 | 1.06963000  | -1.96694700 |
| O | 1.95747400  | -0.35116900 | 0.22518900  |
| O | -1.53733000 | -0.78798000 | -0.69619800 |
| C | 2.51202200  | -1.64334900 | 0.39974200  |
| H | 1.83101700  | -2.32675700 | 0.92755200  |
| H | 2.78211600  | -2.09503100 | -0.56683400 |
| H | 3.41683800  | -1.52124600 | 1.00005300  |
| C | -2.67631300 | -1.46607000 | -0.19817600 |
| H | -3.19583700 | -0.89513800 | 0.58402100  |

|   |             |             |             |
|---|-------------|-------------|-------------|
| H | -3.35724200 | -1.60208600 | -1.04182500 |
| H | -2.40738600 | -2.45417000 | 0.20688400  |

Cartesian coordinates for **TS15** (R/R' = OCH<sub>3</sub>)

|   |             |             |             |
|---|-------------|-------------|-------------|
| C | -0.08232800 | -0.38445600 | -0.70984400 |
| C | -0.02532800 | -0.39434400 | 0.70721300  |
| C | 0.20227000  | 0.85409000  | 1.50891300  |
| C | 0.69058000  | 2.03485000  | 0.65288700  |
| C | -0.11723800 | 2.14933800  | -0.64821000 |
| C | 0.02820500  | 0.88188800  | -1.50855700 |
| H | -0.22738100 | -1.32299200 | -1.23345700 |
| H | -0.13290400 | -1.33971000 | 1.22751800  |
| H | 0.91711600  | 0.62642200  | 2.30694200  |
| H | 1.75017800  | 1.88812500  | 0.41621900  |
| H | 0.21426000  | 3.01823300  | -1.22774000 |
| H | -0.72796400 | 0.85651700  | -2.30053500 |
| H | 1.01078700  | 0.85845800  | -1.99538900 |
| H | -1.17655700 | 2.29814300  | -0.41114500 |
| H | 0.60891500  | 2.96004400  | 1.23427000  |
| H | -0.75447200 | 1.09619000  | 1.98743700  |
| O | -1.88065000 | -0.23835700 | 0.08874900  |
| O | 1.74796400  | -0.72499500 | -0.09127000 |
| C | 2.10200900  | -2.08432400 | -0.10261600 |
| C | -2.57992800 | -1.45652900 | 0.10252600  |
| H | -3.25465400 | -1.52986200 | -0.76407700 |
| H | -1.90699100 | -2.33609000 | 0.06656900  |
| H | -3.18416600 | -1.54895000 | 1.01810000  |
| H | 2.72895300  | -2.33214800 | 0.76756900  |
| H | 1.22119900  | -2.75579500 | -0.07104500 |
| H | 2.66572000  | -2.33284500 | -1.01494400 |

IRC for **TS15** (R/R' = OCH<sub>3</sub>)

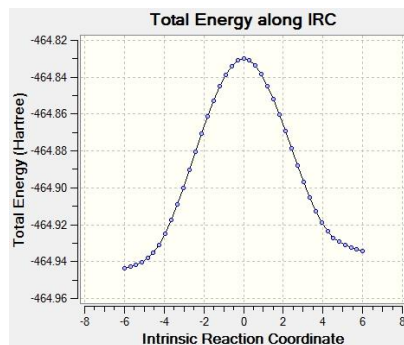

Cartesian coordinates for **S16** (R/R' = SCH<sub>3</sub>)

|   |             |             |             |
|---|-------------|-------------|-------------|
| C | -0.49023100 | -0.34581600 | 0.28566900  |
| C | 0.71789000  | -0.10279300 | -0.64873600 |
| C | 0.71107800  | 1.32232200  | -1.23374600 |
| C | 0.58797000  | 2.40992500  | -0.15473600 |
| C | -0.64619800 | 2.17605500  | 0.73066100  |
| C | -0.63903500 | 0.76625700  | 1.34079800  |
| H | 1.61261600  | 1.47143300  | -1.83730300 |
| H | 0.69101100  | -0.82824800 | -1.46840700 |
| H | -0.36411100 | -1.31107800 | 0.78785100  |
| H | 1.49305400  | 2.41795200  | 0.46762400  |
| H | 0.53084500  | 3.39503500  | -0.63306500 |
| H | -0.68561100 | 2.92243000  | 1.53314800  |
| H | -1.55543400 | 2.30692400  | 0.12998200  |
| H | 0.20629100  | 0.67513300  | 2.03606100  |
| H | -1.54714900 | 0.59908100  | 1.93130500  |
| H | -0.14520300 | 1.39809900  | -1.91782300 |

|   |             |             |             |
|---|-------------|-------------|-------------|
| C | 2.38740800  | -2.22923900 | 0.19372400  |
| H | 1.58044100  | -2.67246800 | 0.78350300  |
| H | 2.34786800  | -2.60815000 | -0.83158400 |
| H | 3.34148600  | -2.51989200 | 0.63997800  |
| C | -3.08354800 | -1.47376800 | 0.38629000  |
| H | -3.33035800 | -0.87515700 | 1.26687100  |
| H | -4.00729400 | -1.69789400 | -0.15244200 |
| H | -2.61956600 | -2.41517900 | 0.69528700  |
| S | -2.00943100 | -0.55925600 | -0.77493300 |
| S | 2.33312600  | -0.40297400 | 0.22302500  |

Cartesian coordinates for **TS16** (R/R' = SCH<sub>3</sub>)

|   |             |             |             |
|---|-------------|-------------|-------------|
| C | -0.01260200 | -0.10414700 | -0.70832800 |
| C | 0.01258900  | -0.10416800 | 0.70830000  |
| C | 0.07308200  | 1.17400000  | 1.51351500  |
| C | 0.40105000  | 2.40740000  | 0.65478800  |
| C | -0.40090000 | 2.40745300  | -0.65473200 |
| C | -0.07305500 | 1.17404700  | -1.51350500 |
| H | -0.03118500 | -1.04668600 | -1.23990900 |
| H | 0.03110100  | -1.04672600 | 1.23985100  |
| H | 0.81439900  | 1.04402900  | 2.30803600  |
| H | 1.47460000  | 2.41869700  | 0.42841400  |
| H | -0.18997900 | 3.31431300  | -1.23188000 |
| H | -0.81442900 | 1.04413800  | -2.30798200 |
| H | 0.89734700  | 1.30237000  | -2.00632200 |
| H | -1.47444700 | 2.41883100  | -0.42834700 |
| H | 0.19019800  | 3.31426200  | 1.23195900  |
| H | -0.89734200 | 1.30237700  | 2.00627400  |
| S | -2.33529100 | -0.41167100 | 0.09075500  |
| S | 2.33523800  | -0.41174800 | -0.09079200 |
| C | 2.31875600  | -2.23964100 | 0.00028200  |
| C | -2.31880300 | -2.23956600 | -0.00025500 |
| H | 2.76656000  | -2.58229200 | 0.93649000  |
| H | 1.29169300  | -2.62838400 | -0.05024800 |
| H | 2.87796100  | -2.66102700 | -0.83878700 |
| H | -1.29171900 | -2.62828100 | 0.05003800  |
| H | -2.87779900 | -2.66094300 | 0.83895700  |
| H | -2.76681900 | -2.58225900 | -0.93634700 |

IRC for **TS16** (R/R' = SCH<sub>3</sub>)

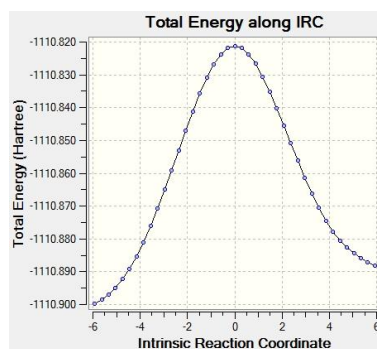

Cartesian coordinates for **S17** [R/R' = OC(CH<sub>3</sub>)<sub>3</sub>]

|   |             |             |             |
|---|-------------|-------------|-------------|
| C | -0.60777700 | 0.28244400  | 0.47824000  |
| C | 0.60777100  | 0.28244700  | -0.47822400 |
| C | 0.63670600  | 1.55815100  | -1.33359800 |
| C | 0.60635600  | 2.83119500  | -0.47239800 |
| C | -0.60640500 | 2.83118700  | 0.47239300  |
| C | -0.63672800 | 1.55815300  | 1.33361100  |
| H | 1.52734500  | 1.54327800  | -1.97178800 |
| H | 0.52034100  | -0.59361800 | -1.12998500 |

|   |             |             |             |
|---|-------------|-------------|-------------|
| H | -0.52033200 | -0.59362100 | 1.12999600  |
| H | 1.53013300  | 2.88944900  | 0.11716100  |
| H | 0.58434400  | 3.71626300  | -1.12014200 |
| H | -0.58441500 | 3.71626200  | 1.12012800  |
| H | -1.53018400 | 2.88940900  | -0.11716600 |
| H | 0.24002000  | 1.53975300  | 1.99340900  |
| H | -1.52738600 | 1.54326100  | 1.97177600  |
| H | -0.24005400 | 1.53972200  | -1.99338200 |
| O | 1.79533300  | 0.20067900  | 0.32698500  |
| O | -1.79536600 | 0.20070600  | -0.32692400 |
| C | 2.74237600  | -0.86711300 | 0.09480400  |
| C | -2.74236300 | -0.86712900 | -0.09481700 |
| C | -2.10943900 | -2.23820500 | -0.39075700 |
| C | -3.86203700 | -0.58052400 | -1.10205500 |
| C | -3.29777700 | -0.81786800 | 1.33909900  |
| C | 2.10944600  | -2.23825400 | 0.39044000  |
| C | 3.86191100  | -0.58066200 | 1.10223800  |
| C | 3.29798200  | -0.81758500 | -1.33902700 |
| H | -3.75482300 | 0.15634900  | 1.53818000  |
| H | -4.06219300 | -1.59034500 | 1.47615300  |
| H | -2.51710200 | -0.99189200 | 2.08643300  |
| H | -3.46520400 | -0.58742300 | -2.12189100 |
| H | -4.65173700 | -1.33552600 | -1.02908700 |
| H | -4.30023200 | 0.40396100  | -0.91240900 |
| H | -1.29417800 | -2.47105000 | 0.30142900  |
| H | -2.85777400 | -3.03224300 | -0.29431200 |
| H | -1.71515700 | -2.26132000 | -1.41176300 |
| H | 2.85784500  | -3.03224000 | 0.29405000  |
| H | 1.71497200  | -2.26151600 | 1.41136700  |
| H | 1.29433700  | -2.47106700 | -0.30193400 |
| H | 4.06246700  | -1.58999200 | -1.47610200 |
| H | 2.51742400  | -0.99153600 | -2.08649700 |
| H | 3.75499800  | 0.15669200  | -1.53787300 |
| H | 4.30009600  | 0.40387500  | 0.91283500  |
| H | 3.46494700  | -0.58776900 | 2.12202000  |
| H | 4.65164900  | -1.33561900 | 1.02922400  |

Cartesian coordinates for **TS17** [R/R' = OC(CH<sub>3</sub>)<sub>3</sub>]

|   |             |             |             |
|---|-------------|-------------|-------------|
| C | -0.00704900 | -0.48060000 | 0.71537300  |
| C | 0.00447100  | -0.48015300 | -0.71578400 |
| C | -0.03647800 | 0.78926000  | -1.51211700 |
| C | -0.35257100 | 2.04680600  | -0.68183900 |
| C | 0.35269000  | 2.04592600  | 0.68250000  |
| C | 0.03452000  | 0.78855000  | 1.51220800  |
| H | -0.00047700 | -1.42489600 | 1.23272600  |
| H | 0.00093300  | -1.42418100 | -1.23364800 |
| H | -0.76606900 | 0.65982300  | -2.31798200 |
| H | -1.43367500 | 2.11573400  | -0.52933400 |
| H | 0.06418600  | 2.93635700  | 1.25245500  |
| H | 0.76367200  | 0.65787800  | 2.31825700  |
| H | -0.93732600 | 0.88545100  | 2.00510200  |
| H | 1.43387800  | 2.11302400  | 0.53002400  |
| H | -0.06263500 | 2.93701000  | -1.25141200 |
| H | 0.93543200  | 0.88463000  | -2.00515600 |
| O | 1.82213900  | -0.94268400 | -0.03928600 |
| O | -1.82129300 | -0.94299000 | 0.03784200  |
| C | -3.16771500 | -0.46004400 | 0.01707600  |
| C | 3.16814100  | -0.46005600 | -0.01714000 |
| C | -3.45630800 | 0.58459900  | 1.11114600  |
| C | -3.53417000 | 0.10297800  | -1.36941300 |
| C | -4.02366200 | -1.71648600 | 0.29158500  |
| C | 4.02492000  | -1.71618400 | -0.29086600 |
| C | 3.45757000  | 0.58471800  | -1.11110200 |

|   |             |             |             |
|---|-------------|-------------|-------------|
| C | 3.53385700  | 0.10328100  | 1.36952900  |
| H | -5.09444200 | -1.47625700 | 0.28985600  |
| H | -3.83203200 | -2.47373400 | -0.47450000 |
| H | -3.76138600 | -2.14307400 | 1.26466100  |
| H | -4.60693500 | 0.32053100  | -1.43349300 |
| H | -2.99764300 | 1.03169500  | -1.58557300 |
| H | -3.28691000 | -0.62823800 | -2.14601800 |
| H | -4.52215200 | 0.83987700  | 1.12481400  |
| H | -3.19424900 | 0.18900200  | 2.09854300  |
| H | -2.90114000 | 1.51361200  | 0.94977900  |
| H | 2.90063700  | 1.51296400  | -0.95133600 |
| H | 4.52304500  | 0.84164300  | -1.12311200 |
| H | 3.19751300  | 0.18769000  | -2.09840100 |
| H | 3.28838900  | -0.62869500 | 2.14600100  |
| H | 4.60611800  | 0.32337400  | 1.43349000  |
| H | 2.99515200  | 1.03065100  | 1.58611100  |
| H | 3.76494600  | -2.14190700 | -1.26495100 |
| H | 5.09573100  | -1.47604000 | -0.28637500 |
| H | 3.83138300  | -2.47410600 | 0.47408000  |

IRC for **TS17** [R/R' = OC(CH<sub>3</sub>)<sub>3</sub>]

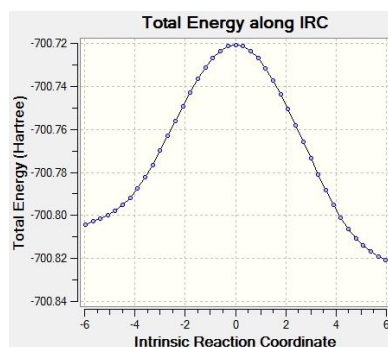

Cartesian coordinates for **S18** (R/R' = OCH<sub>2</sub>Ph)

|   |             |             |             |
|---|-------------|-------------|-------------|
| C | -0.37982400 | 0.35940800  | 0.50930800  |
| C | 0.44537500  | 0.41305100  | -0.79621000 |
| C | 0.18978200  | 1.70768100  | -1.57291800 |
| C | 0.41199700  | 2.96155200  | -0.71177000 |
| C | -0.43987900 | 2.91027100  | 0.56604300  |
| C | -0.16507700 | 1.62260100  | 1.35855800  |
| H | 0.84024500  | 1.71876100  | -2.45494700 |
| H | 0.15936500  | -0.44950500 | -1.41626100 |
| H | -0.07432800 | -0.52628300 | 1.09010200  |
| H | 1.47341500  | 3.03382500  | -0.44317100 |
| H | 0.16886800  | 3.85768900  | -1.29548800 |
| H | -0.23456400 | 3.78369600  | 1.19682700  |
| H | -1.50345500 | 2.95377300  | 0.29750800  |
| H | 0.87893300  | 1.61463800  | 1.69644600  |
| H | -0.78555800 | 1.57867900  | 2.26171800  |
| H | -0.84779100 | 1.68261600  | -1.92756300 |
| O | 1.84640900  | 0.34142900  | -0.49661600 |
| O | -1.74183100 | 0.18305500  | 0.09875800  |
| C | 2.36116500  | -0.98396000 | -0.36295500 |
| H | 1.87223200  | -1.51531600 | 0.46658900  |
| H | 2.15184300  | -1.54697600 | -1.28687100 |
| C | -2.62244900 | -0.28490500 | 1.11930800  |
| H | -2.74471600 | 0.46986600  | 1.90871100  |
| H | -2.18967300 | -1.18635800 | 1.58420000  |
| C | 3.84807200  | -0.91406200 | -0.11622900 |
| C | 4.71936900  | -0.54432500 | -1.15106500 |
| C | 4.38300600  | -1.20976400 | 1.14315900  |
| C | 6.09530500  | -0.47135100 | -0.93068300 |



|   |             |             |             |
|---|-------------|-------------|-------------|
| H | 4.31281600  | -0.30850000 | -2.13096600 |
| C | 5.76141100  | -1.14192700 | 1.36808200  |
| H | 3.71724700  | -1.49528400 | 1.95406900  |
| C | 6.62026300  | -0.77196200 | 0.33095700  |
| H | 6.75881500  | -0.18431600 | -1.74158300 |
| H | 6.16154600  | -1.37614000 | 2.35051400  |
| H | 7.69163800  | -0.71923000 | 0.50237700  |
| C | -3.96466100 | -0.60258300 | 0.50679000  |
| C | -5.07676300 | 0.21046000  | 0.75480800  |
| C | -4.11624400 | -1.71938200 | -0.32790500 |
| C | -6.31916200 | -0.08439400 | 0.18487100  |
| H | -4.96995300 | 1.08135200  | 1.39686700  |
| C | -5.35294500 | -2.01591600 | -0.90200600 |
| H | -3.25773000 | -2.35459600 | -0.52960400 |
| C | -6.45923400 | -1.19853500 | -0.64513000 |
| H | -7.17314300 | 0.55561000  | 0.38782400  |
| H | -5.45649400 | -2.88484000 | -1.54580400 |
| H | -7.42323400 | -1.43078300 | -1.08871900 |

Cartesian coordinates for **TS18** (R/R' = OCH<sub>2</sub>Ph)

|   |             |             |             |
|---|-------------|-------------|-------------|
| C | -0.07963600 | 0.12178000  | 0.70618400  |
| C | 0.07955800  | 0.12145900  | -0.70683800 |
| C | 0.15730700  | 1.38791600  | -1.50194000 |
| C | -0.25548400 | 2.65475900  | -0.72546900 |
| C | 0.25525800  | 2.65510800  | 0.72364200  |
| C | -0.15741600 | 1.38859400  | 1.50071900  |
| H | -0.13638200 | -0.82545400 | 1.21953300  |
| H | 0.13643200  | -0.82601000 | -1.21974200 |
| H | -0.45376000 | 1.26706000  | -2.40398100 |
| H | -1.34549500 | 2.74321800  | -0.72658600 |
| H | -0.12574200 | 3.53753400  | 1.24951100  |
| H | 0.45374500  | 1.26817100  | 2.40275300  |
| H | -1.19321300 | 1.47622000  | 1.85683300  |
| H | 1.34526400  | 2.74363000  | 0.72469900  |
| H | 0.12547300  | 3.53696400  | -1.25174200 |
| H | 1.19313800  | 1.47543900  | -1.85798300 |
| O | 1.82534700  | -0.23272000 | 0.18839000  |
| O | -1.82531100 | -0.23293100 | -0.18879400 |
| C | -2.91656700 | 0.65490200  | -0.28142400 |
| H | -2.92538300 | 1.17543200  | -1.25426700 |
| H | -2.88112900 | 1.43231200  | 0.50338200  |
| C | 2.91656200  | 0.65520800  | 0.28042800  |
| H | 2.88125500  | 1.43189500  | -0.50511300 |
| H | 2.92522800  | 1.17664800  | 1.25278400  |
| C | 4.20616600  | -0.12903400 | 0.12880800  |
| C | 4.79804400  | -0.74440900 | 1.24040100  |
| C | 4.80827500  | -0.28617100 | -1.12657300 |
| C | 5.96551600  | -1.49819200 | 1.10250400  |
| H | 4.33735500  | -0.63259100 | 2.21887200  |
| C | 5.97639300  | -1.03899800 | -1.27088700 |
| H | 4.35780800  | 0.18462100  | -1.99733400 |
| C | 6.55823100  | -1.64764400 | -0.15517400 |
| H | 6.41364900  | -1.96689800 | 1.97434900  |
| H | 6.43259400  | -1.14865100 | -2.25094200 |
| H | 7.46742200  | -2.23210100 | -0.26421400 |
| C | -4.20613100 | -0.12921200 | -0.12881000 |
| C | -4.79737400 | -0.74693900 | -1.23944300 |
| C | -4.80884300 | -0.28386100 | 1.12658400  |
| C | -5.96480600 | -1.50059500 | -1.10058200 |
| H | -4.33619900 | -0.63707300 | -2.21790500 |
| C | -5.97694000 | -1.03655000 | 1.27186000  |
| H | -4.35888700 | 0.18878300  | 1.99660800  |
| C | -6.55813200 | -1.64755600 | 0.15710900  |

|   |             |             |             |
|---|-------------|-------------|-------------|
| H | -6.41244200 | -1.97114800 | -1.97168600 |
| H | -6.43361100 | -1.14425800 | 2.25191100  |
| H | -7.46729700 | -2.23191400 | 0.26689000  |

Cartesian coordinates for **S19** (R/R' = OCH<sub>2</sub>OCH<sub>3</sub>)

|   |             |             |             |
|---|-------------|-------------|-------------|
| C | -0.48062900 | -0.38969900 | 0.64012800  |
| C | -0.56265500 | 0.33402700  | -0.72440500 |
| C | -1.85979500 | -0.00470100 | -1.46306800 |
| C | -3.10862600 | 0.25495700  | -0.60346400 |
| C | -3.02443800 | -0.49281600 | 0.73713200  |
| C | -1.73022800 | -0.13942800 | 1.48771800  |
| H | -1.89721000 | 0.57466900  | -2.39286500 |
| H | 0.30625300  | 0.04396400  | -1.32695800 |
| H | 0.41401900  | -0.04407800 | 1.16859000  |
| H | -3.20204700 | 1.33259100  | -0.41782100 |
| H | -4.00594800 | -0.05142000 | -1.15491000 |
| H | -3.89254100 | -0.25070200 | 1.36234900  |
| H | -3.05441800 | -1.57501200 | 0.55689600  |
| H | -1.73825800 | 0.92327600  | 1.75880800  |
| H | -1.64815700 | -0.71430700 | 2.41759600  |
| H | -1.81534800 | -1.06533300 | -1.73848800 |
| O | -0.53415500 | 1.76471900  | -0.51454400 |
| O | -0.37191700 | -1.81353700 | 0.40351200  |
| C | 0.70552300  | 2.37603600  | -0.57686100 |
| C | 0.89672600  | -2.35446800 | 0.51041900  |
| O | 1.44794200  | 2.12484500  | 0.61139400  |
| C | 2.71659800  | 2.75655100  | 0.60138500  |
| H | 1.40154900  | -2.01765800 | 1.43595700  |
| H | 0.52086800  | 3.45563200  | -0.67679200 |
| H | 1.28858100  | 2.01402700  | -1.44479300 |
| H | 3.20479000  | 2.50935700  | 1.54609100  |
| H | 3.34218500  | 2.39805100  | -0.23071200 |
| H | 2.62234200  | 3.85086800  | 0.52475900  |
| H | 0.77343400  | -3.44704000 | 0.53157700  |
| O | 1.69289700  | -1.97847200 | -0.60713400 |
| C | 3.01379900  | -2.48600400 | -0.52683300 |
| H | 3.54184800  | -2.14815000 | -1.42059700 |
| H | 3.53871900  | -2.10923800 | 0.36469000  |
| H | 3.02355400  | -3.58666700 | -0.50210100 |

Cartesian coordinates for **TS19** (R/R' = OCH<sub>2</sub>OCH<sub>3</sub>)

|   |             |             |             |
|---|-------------|-------------|-------------|
| C | 0.14257400  | -1.05505300 | -0.69655600 |
| C | -0.14236000 | -1.05535800 | 0.69644300  |
| C | -0.21089700 | 0.20635400  | 1.49570000  |
| C | 0.24308300  | 1.46490300  | 0.72828300  |
| C | -0.24390900 | 1.46501300  | -0.72748800 |
| C | 0.21086300  | 0.20701200  | -1.49523500 |
| H | 0.24450500  | -2.00387200 | -1.20031600 |
| H | -0.24424600 | -2.00440600 | 1.19975000  |
| H | 0.38858800  | 0.05943800  | 2.40332000  |
| H | 1.33419200  | 1.53440200  | 0.73665700  |
| H | 0.13475900  | 2.35244300  | -1.24612400 |
| H | -0.38820300 | 0.06025000  | -2.40315100 |
| H | 1.25199900  | 0.30445100  | -1.82102000 |
| H | -1.33507100 | 1.53381900  | -0.73589600 |
| H | -0.13611800 | 2.35193600  | 1.24720400  |
| H | -1.25195600 | 0.30326400  | 1.82197400  |
| O | -1.83897700 | -1.46613400 | -0.27802000 |
| O | 1.83910700  | -1.46605100 | 0.27779200  |
| C | 2.88210200  | -0.64975800 | 0.61656400  |
| H | 2.67024800  | -0.00795000 | 1.49783200  |
| H | 3.75078000  | -1.29045900 | 0.86736700  |

|   |             |             |             |
|---|-------------|-------------|-------------|
| C | -2.88208900 | -0.65001100 | -0.61662600 |
| H | -2.67065900 | -0.00849900 | -1.49822200 |
| H | -3.75081800 | -1.29086000 | -0.86687600 |
| O | -3.25046400 | 0.20636000  | 0.47441300  |
| O | 3.25079900  | 0.20620100  | -0.47464100 |
| C | -4.41183400 | 0.96714400  | 0.19859700  |
| C | 4.41207200  | 0.96725000  | -0.19915800 |
| H | -5.28193200 | 0.32020100  | 0.00689200  |
| H | -4.61475100 | 1.58105100  | 1.07898600  |
| H | -4.27092200 | 1.62752500  | -0.67236200 |
| H | 5.28217200  | 0.32049600  | -0.00681000 |
| H | 4.61512200  | 1.58051000  | -1.07996800 |
| H | 4.27094900  | 1.62826900  | 0.67127800  |

IRC for **TS19** (R/R' = OCH<sub>2</sub>OCH<sub>3</sub>)

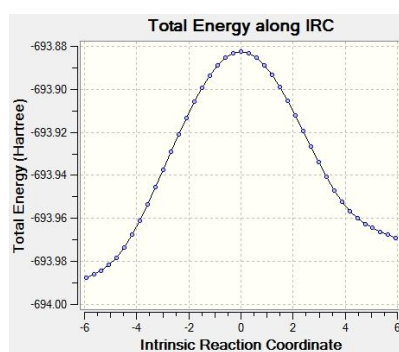

Cartesian coordinates for **S20** [R/R' = OSi(CH<sub>3</sub>)<sub>3</sub>]

|   |             |             |             |
|---|-------------|-------------|-------------|
| C | -0.74793200 | 1.19210800  | 0.22517500  |
| C | 0.70570100  | 1.47597700  | -0.20284300 |
| C | 0.86628000  | 2.86200700  | -0.82710400 |
| C | 0.28736800  | 3.97705600  | 0.05999400  |
| C | -1.18172800 | 3.69778000  | 0.41652000  |
| C | -1.33891300 | 2.31902500  | 1.07712300  |
| H | 1.92827000  | 3.03841600  | -1.03334600 |
| H | 1.02254500  | 0.69822100  | -0.90239700 |
| H | -0.78496300 | 0.24588800  | 0.77201400  |
| H | 0.88206600  | 4.05694500  | 0.97833700  |
| H | 0.37504100  | 4.93743300  | -0.46082600 |
| H | -1.56025900 | 4.47182200  | 1.09377700  |
| H | -1.79648900 | 3.73906200  | -0.49074900 |
| H | -0.81703300 | 2.30317300  | 2.04175800  |
| H | -2.39356300 | 2.09883100  | 1.28107200  |
| H | 0.34531100  | 2.84709600  | -1.79170800 |
| O | 1.51729500  | 1.42293600  | 1.00095400  |
| O | -1.48092200 | 1.06821800  | -1.02555300 |
| C | 2.13579800  | 0.28083600  | 1.42100200  |
| C | -2.66548700 | 0.39143400  | -1.10423800 |
| C | 2.82213000  | -0.58008100 | 0.40338900  |
| C | 2.88835100  | -1.96099400 | 0.64375000  |
| C | 3.47387200  | -0.04108900 | -0.71655200 |
| C | 3.57091000  | -2.79532800 | -0.24116600 |
| H | 2.40943900  | -2.36262400 | 1.53086900  |
| C | 4.17442200  | -0.87599300 | -1.58866900 |
| H | 3.45589600  | 1.02991100  | -0.89130300 |
| C | 4.21561200  | -2.25411200 | -1.35821000 |
| H | 3.61028300  | -3.86440800 | -0.05456700 |
| H | 4.68921100  | -0.45089800 | -2.44505300 |
| H | 4.75510100  | -2.90282400 | -2.04207100 |
| C | -2.76950500 | -0.94133300 | -0.42808200 |
| C | -1.69206200 | -1.83975400 | -0.38838400 |
| C | -4.01299800 | -1.32818200 | 0.09325300  |

|   |             |             |             |
|---|-------------|-------------|-------------|
| C | -1.85715900 | -3.10656600 | 0.17361600  |
| H | -0.73616600 | -1.56067800 | -0.82085600 |
| C | -4.16831200 | -2.58616300 | 0.67505300  |
| H | -4.84758200 | -0.63743600 | 0.03092900  |
| C | -3.09150400 | -3.47762000 | 0.71465000  |
| H | -1.02414600 | -3.80298800 | 0.18714100  |
| H | -5.12997500 | -2.87489600 | 1.08850500  |
| H | -3.21564000 | -4.46058400 | 1.15956900  |
| O | -3.56550900 | 0.85182800  | -1.77224000 |
| O | 2.17208400  | 0.03158000  | 2.60674500  |

Cartesian coordinates for **TS20** [R/R' = OSi(CH<sub>3</sub>)<sub>3</sub>]

|   |             |             |             |
|---|-------------|-------------|-------------|
| C | 0.01748800  | 0.21845100  | -0.74540100 |
| C | -0.02874800 | 0.16944500  | 0.68519000  |
| C | -0.05527300 | 1.40091500  | 1.51548300  |
| C | 0.32758200  | 2.68786000  | 0.75873600  |
| C | -0.28983900 | 2.74624300  | -0.64877600 |
| C | 0.05021200  | 1.50160100  | -1.49241700 |
| H | 0.03239400  | -0.71867400 | -1.28290000 |
| H | -0.04278800 | -0.80163900 | 1.15824200  |
| H | 0.58101800  | 1.23275000  | 2.39220700  |
| H | 1.41533900  | 2.74409000  | 0.67971300  |
| H | 0.08153300  | 3.63222400  | -1.17348300 |
| H | -0.60759800 | 1.40133900  | -2.36394800 |
| H | 1.07393800  | 1.57499800  | -1.88591100 |
| H | -1.37521000 | 2.83283300  | -0.56507000 |
| H | -0.01377400 | 3.54821200  | 1.34323800  |
| H | -1.08612700 | 1.47212900  | 1.89054400  |
| O | -1.89335600 | -0.29994900 | -0.13139800 |
| O | 1.88700700  | -0.30791800 | 0.05046400  |
| C | 2.98392600  | 0.39085700  | -0.19550700 |
| C | -2.98375100 | 0.39526600  | 0.15308100  |
| C | -4.25547400 | -0.40863800 | 0.03219500  |
| C | -4.25153000 | -1.75731800 | -0.35193500 |
| C | -5.47298400 | 0.22725800  | 0.31691500  |
| C | -5.45334600 | -2.46121400 | -0.44969200 |
| H | -3.30717900 | -2.24303400 | -0.56975700 |
| C | -6.67219100 | -0.47832500 | 0.21860100  |
| H | -5.45713900 | 1.27075500  | 0.61271200  |
| C | -6.66461200 | -1.82368000 | -0.16465400 |
| H | -5.44513700 | -3.50582000 | -0.74748500 |
| H | -7.61190300 | 0.01925300  | 0.44057500  |
| H | -7.59898800 | -2.37273900 | -0.24060700 |
| C | 4.25277300  | -0.41412900 | -0.04983500 |
| C | 5.47658000  | 0.22188100  | -0.30570300 |
| C | 4.24000300  | -1.76307400 | 0.33301400  |
| C | 6.67329000  | -0.48353400 | -0.17916000 |
| H | 5.46747400  | 1.26562400  | -0.60091900 |
| C | 5.43929200  | -2.46666800 | 0.45984200  |
| H | 3.29072600  | -2.24906900 | 0.52757400  |
| C | 6.65691300  | -1.82880900 | 0.20408000  |
| H | 7.61793400  | 0.01423200  | -0.37871000 |
| H | 5.42424600  | -3.51122900 | 0.75757500  |
| H | 7.58936400  | -2.37752900 | 0.30283100  |
| O | 3.01706100  | 1.57429700  | -0.52703900 |
| O | -3.00695800 | 1.57419100  | 0.50037800  |

IRC for **TS20** [R/R' = OSi(CH<sub>3</sub>)<sub>3</sub>]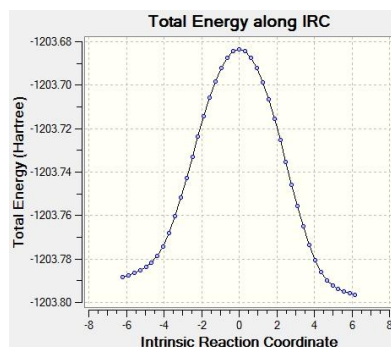Cartesian coordinates for **S21** [R/R' = OC(O)CH<sub>3</sub>]

|    |             |             |             |
|----|-------------|-------------|-------------|
| C  | 0.58871000  | 0.47599200  | -0.50050700 |
| C  | -0.58835500 | 0.47567200  | 0.50018600  |
| C  | -0.59308200 | 1.75019100  | 1.35403500  |
| C  | -0.59128100 | 3.02267100  | 0.49187700  |
| C  | 0.59090000  | 3.02298500  | -0.49150200 |
| C  | 0.59306900  | 1.75074800  | -1.35401300 |
| H  | -1.46509100 | 1.73021500  | 2.01832300  |
| H  | -0.46976500 | -0.40013800 | 1.15508900  |
| H  | 0.47036000  | -0.39965500 | -1.15566900 |
| H  | -1.53339500 | 3.08068100  | -0.06782700 |
| H  | -0.54913500 | 3.90772100  | 1.13846600  |
| H  | 0.54849200  | 3.90820800  | -1.13783600 |
| H  | 1.53299800  | 3.08110600  | 0.06821400  |
| H  | -0.30213100 | 1.73273000  | -1.98803000 |
| H  | 1.46509900  | 1.73118900  | -2.01828700 |
| H  | 0.30212800  | 1.73225200  | 1.98804100  |
| O  | -1.80383200 | 0.38140600  | -0.25200900 |
| O  | 1.80427500  | 0.38190400  | 0.25157800  |
| Si | 2.98761900  | -0.79749900 | 0.07592100  |
| Si | -2.98761900 | -0.79748300 | -0.07594200 |
| C  | -3.68372700 | -0.78103400 | 1.68078700  |
| H  | -2.90453600 | -0.97137400 | 2.42811700  |
| H  | -4.14320000 | 0.18570400  | 1.91545800  |
| H  | -4.45087000 | -1.55528100 | 1.80316800  |
| C  | -4.31028800 | -0.33955700 | -1.33055900 |
| H  | -3.89960300 | -0.32986300 | -2.34614300 |
| H  | -5.14151000 | -1.05409300 | -1.30903200 |
| H  | -4.71596200 | 0.65688400  | -1.12423100 |
| C  | -2.26903400 | -2.50653100 | -0.44538000 |
| H  | -3.03548500 | -3.28384300 | -0.33919800 |
| H  | -1.88077000 | -2.55839600 | -1.46896500 |
| H  | -1.45032800 | -2.76050700 | 0.23793100  |
| C  | 4.31031400  | -0.33989100 | 1.33062900  |
| H  | 3.89960600  | -0.32990900 | 2.34620000  |
| H  | 5.14132800  | -1.05467000 | 1.30923300  |
| H  | 4.71628600  | 0.65640200  | 1.12415400  |
| C  | 3.68415300  | -0.78142200 | -1.68064100 |
| H  | 2.90511600  | -0.97131000 | -2.42824200 |
| H  | 4.14420700  | 0.18509100  | -1.91510100 |
| H  | 4.45093800  | -1.55606200 | -1.80279500 |
| C  | 2.26826900  | -2.50620300 | 0.44544700  |
| H  | 3.03437500  | -3.28386200 | 0.33933500  |
| H  | 1.87999000  | -2.55780000 | 1.46904200  |
| H  | 1.44944700  | -2.75986900 | -0.23783600 |

Cartesian coordinates for **TS21** [R/R' = OC(O)CH<sub>3</sub>]

|   |             |            |            |
|---|-------------|------------|------------|
| C | -0.00995400 | 0.52558600 | 0.71175500 |
|---|-------------|------------|------------|

|    |             |             |             |
|----|-------------|-------------|-------------|
| C  | 0.00981400  | 0.52566500  | -0.71191900 |
| C  | -0.00255700 | 1.79316000  | -1.51475200 |
| C  | -0.36246000 | 3.03259400  | -0.67713600 |
| C  | 0.36245200  | 3.03250200  | 0.67723600  |
| C  | 0.00249400  | 1.79299800  | 1.51472500  |
| H  | -0.01811500 | -0.42446500 | 1.22846500  |
| H  | 0.01798900  | -0.42434000 | -1.22873400 |
| H  | -0.70521000 | 1.66425900  | -2.34474400 |
| H  | -1.44501100 | 3.04474900  | -0.51457400 |
| H  | 0.10344900  | 3.93407800  | 1.24360600  |
| H  | 0.70516300  | 1.66397100  | 2.34468300  |
| H  | -0.99887300 | 1.89408100  | 1.94843300  |
| H  | 1.44500200  | 3.04461400  | 0.51467000  |
| H  | -0.10340800 | 3.93421500  | -1.24341000 |
| H  | 0.99883000  | 1.89422700  | -1.94841900 |
| O  | 1.84131600  | 0.49062200  | 0.02106600  |
| O  | -1.84135500 | 0.49065200  | -0.02126600 |
| Si | 2.91717700  | -0.78315200 | -0.01448700 |
| Si | -2.91715200 | -0.78318900 | 0.01449400  |
| C  | 4.37551500  | -0.36117900 | 1.11214900  |
| H  | 5.12968700  | -1.15788600 | 1.10949200  |
| H  | 4.86205100  | 0.56532600  | 0.78710400  |
| H  | 4.04296600  | -0.21653100 | 2.14655900  |
| C  | 3.53408900  | -1.04630500 | -1.78558900 |
| H  | 3.99200300  | -0.13111300 | -2.17832800 |
| H  | 4.28586700  | -1.84372300 | -1.83390800 |
| H  | 2.71491400  | -1.32381100 | -2.46008900 |
| C  | 2.12248300  | -2.39844000 | 0.59142500  |
| H  | 1.77357700  | -2.31806000 | 1.62833600  |
| H  | 1.27018500  | -2.70033300 | -0.02923900 |
| H  | 2.84995400  | -3.21888000 | 0.55837900  |
| C  | -2.12270500 | -2.39828900 | -0.59221600 |
| H  | -1.77426500 | -2.31759100 | -1.62925900 |
| H  | -1.27013100 | -2.70039600 | 0.02796400  |
| H  | -2.85017400 | -3.21872900 | -0.55910000 |
| C  | -3.53322500 | -1.04676400 | 1.78582300  |
| H  | -3.99096800 | -0.13166700 | 2.17898100  |
| H  | -4.28497900 | -1.84419400 | 1.83430000  |
| H  | -2.71374400 | -1.32442400 | 2.45989000  |
| C  | -4.37599900 | -0.36095100 | -1.11136900 |
| H  | -5.13015200 | -1.15767700 | -1.10857600 |
| H  | -4.86241800 | 0.56546300  | -0.78588800 |
| H  | -4.04390600 | -0.21604800 | -2.14588900 |

IRC for **TS21** [R/R' = OC(O)CH<sub>3</sub>]

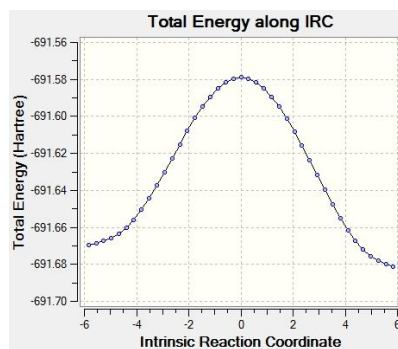

Cartesian coordinates for **S22** (R/R' = OPh)

|   |             |            |             |
|---|-------------|------------|-------------|
| C | -0.65540600 | 0.24113500 | 0.40504800  |
| C | 0.65549200  | 0.24105300 | -0.40500900 |
| C | 0.82146200  | 1.52039100 | -1.23636900 |
| C | 0.66631800  | 2.78958900 | -0.38271700 |

|   |             |             |             |
|---|-------------|-------------|-------------|
| C | -0.66644300 | 2.78965100  | 0.38193100  |
| C | -0.82142000 | 1.52071700  | 1.23602000  |
| H | 1.79474400  | 1.50959700  | -1.73828600 |
| H | 0.64460100  | -0.64585200 | -1.04846700 |
| H | -0.64444300 | -0.64554600 | 1.04880300  |
| H | 1.49852100  | 2.85212500  | 0.32997000  |
| H | 0.73506500  | 3.67416800  | -1.02667400 |
| H | -0.73525900 | 3.67444400  | 1.02558200  |
| H | -1.49867600 | 2.85184200  | -0.33075100 |
| H | -0.05423800 | 1.50348500  | 2.02001300  |
| H | -1.79465600 | 1.51001200  | 1.73801600  |
| H | 0.05437100  | 1.50286900  | -2.02044300 |
| O | 1.69349200  | 0.11017300  | 0.58221000  |
| O | -1.69339100 | 0.10986600  | -0.58216100 |
| C | 2.92534900  | -0.38281600 | 0.23993400  |
| C | 3.86519600  | -0.42024200 | 1.28221800  |
| C | 3.28255000  | -0.84545700 | -1.03364400 |
| C | 5.14463200  | -0.91858100 | 1.05258700  |
| H | 3.56858600  | -0.05785900 | 2.26137200  |
| C | 4.57311200  | -1.34466200 | -1.24826400 |
| H | 2.58017400  | -0.82176500 | -1.85787600 |
| C | 5.50984300  | -1.38577100 | -0.21611400 |
| H | 5.86065000  | -0.94294800 | 1.86926400  |
| H | 4.83952200  | -1.70089900 | -2.23949900 |
| H | 6.50817000  | -1.77288300 | -0.39407600 |
| C | -2.92529600 | -0.38301600 | -0.23980100 |
| C | -3.28271300 | -0.84495400 | 1.03396000  |
| C | -3.86500100 | -0.42095200 | -1.28220500 |
| C | -4.57335300 | -1.34396300 | 1.24865300  |
| H | -2.58046500 | -0.82092300 | 1.85828700  |
| C | -5.14449600 | -0.91908300 | -1.05251100 |
| H | -3.56819500 | -0.05912100 | -2.26150600 |
| C | -5.50993300 | -1.38555600 | 0.21639800  |
| H | -4.83993300 | -1.69963200 | 2.24004700  |
| H | -5.86038600 | -0.94384800 | -1.86928800 |
| H | -6.50831800 | -1.77248000 | 0.39444000  |

Cartesian coordinates for **TS22** (R/R' = OPh)

|   |             |             |             |
|---|-------------|-------------|-------------|
| C | 0.03248100  | 1.10729300  | 0.70926400  |
| C | -0.03253500 | 1.10730600  | -0.70931000 |
| C | -0.09299400 | 2.37268700  | -1.50700400 |
| C | -0.40915500 | 3.61041800  | -0.64959500 |
| C | 0.40921400  | 3.61038500  | 0.64959900  |
| C | 0.09298700  | 2.37265600  | 1.50698500  |
| H | 0.05736100  | 0.15214500  | 1.22151900  |
| H | -0.05741800 | 0.15217000  | -1.22159400 |
| H | -0.83098100 | 2.24307300  | -2.30598200 |
| H | -1.47872200 | 3.61557300  | -0.41192700 |
| H | 0.19976000  | 4.51432600  | 1.23161900  |
| H | 0.83096100  | 2.24299400  | 2.30596800  |
| H | -0.88613400 | 2.47971200  | 1.99086300  |
| H | 1.47878100  | 3.61548400  | 0.41192800  |
| H | -0.19965200 | 4.51435700  | -1.23160000 |
| H | 0.88612700  | 2.47970400  | -1.99088900 |
| O | 1.88563400  | 1.00250800  | -0.10852300 |
| O | -1.88566100 | 1.00255100  | 0.10849500  |
| C | -2.44321300 | -0.22514800 | 0.08566600  |
| C | -2.63758200 | -0.95505100 | 1.27680500  |
| C | -2.87314500 | -0.79328200 | -1.13190200 |
| C | -3.25692500 | -2.20522100 | 1.24736700  |
| H | -2.31877900 | -0.51806300 | 2.21904800  |
| C | -3.49306900 | -2.04283700 | -1.15055600 |
| H | -2.73446500 | -0.22900000 | -2.04992300 |

|   |             |             |             |
|---|-------------|-------------|-------------|
| C | -3.68696600 | -2.75800200 | 0.03643600  |
| H | -3.40561600 | -2.75039200 | 2.17567000  |
| H | -3.82687400 | -2.46080600 | -2.09659900 |
| H | -4.16690000 | -3.73171500 | 0.01793000  |
| C | 2.44319600  | -0.22515900 | -0.08566000 |
| C | 2.87324100  | -0.79322500 | 1.13190000  |
| C | 2.63746900  | -0.95512300 | -1.27677800 |
| C | 3.49318700  | -2.04277000 | 1.15056100  |
| H | 2.73461900  | -0.22890600 | 2.04990700  |
| C | 3.25683400  | -2.20528000 | -1.24733300 |
| H | 2.31858300  | -0.51817400 | -2.21901400 |
| C | 3.68699100  | -2.75799200 | -0.03641100 |
| H | 3.82708000  | -2.46068700 | 2.09659600  |
| H | 3.40545400  | -2.75049700 | -2.17562100 |
| H | 4.16694100  | -3.73169700 | -0.01789700 |

IRC for **TS22** (R/R' = OPh)

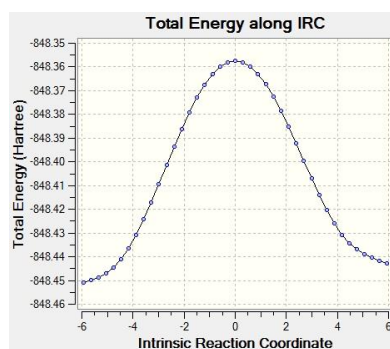

Cartesian coordinates for **S23** [R/R' = OC(O)Ph]

|   |             |             |             |
|---|-------------|-------------|-------------|
| C | -0.42346100 | -0.09131100 | 0.33942300  |
| C | 0.65879700  | 0.17843100  | -0.72050900 |
| C | 0.55754000  | 1.57567200  | -1.33208900 |
| C | 0.47394200  | 2.68507700  | -0.27118900 |
| C | -0.67180800 | 2.42129600  | 0.71896200  |
| C | -0.53718600 | 1.03555900  | 1.37053700  |
| H | 1.41225200  | 1.73177800  | -1.99984400 |
| H | 0.60703600  | -0.59739400 | -1.48697000 |
| H | -0.23207700 | -1.04769400 | 0.83126600  |
| H | 1.42472200  | 2.74033100  | 0.27437800  |
| H | 0.33619500  | 3.65451700  | -0.76427600 |
| H | -0.68713300 | 3.19297200  | 1.49740800  |
| H | -1.63310700 | 2.48725100  | 0.19255200  |
| H | 0.37085100  | 1.00641000  | 1.98657100  |
| H | -1.37798400 | 0.82138600  | 2.03758900  |
| H | -0.34474600 | 1.59273700  | -1.95613100 |
| O | 1.95433800  | 0.08070000  | -0.06207400 |
| O | -1.66096700 | -0.21996200 | -0.41902500 |
| C | 2.59039600  | -1.11903300 | -0.08801800 |
| C | -2.63516300 | -1.00698100 | 0.10304900  |
| O | -2.54037200 | -1.57918000 | 1.16880200  |
| O | 2.13974800  | -2.11200100 | -0.62018300 |
| C | -3.82684100 | -1.07520800 | -0.82029000 |
| C | 3.91540400  | -1.04058100 | 0.62968300  |
| H | -3.54172000 | -1.57120000 | -1.75362700 |
| H | -4.62727400 | -1.63512700 | -0.33720500 |
| H | -4.17019800 | -0.06842800 | -1.07502300 |
| H | 4.52563000  | -0.23412700 | 0.21288400  |
| H | 3.75067600  | -0.81371800 | 1.68785900  |
| H | 4.43517700  | -1.99366400 | 0.53505600  |



Cartesian coordinates for **TS23** [R/R' = OC(O)Ph<sub>2</sub>]

|   |             |             |             |
|---|-------------|-------------|-------------|
| C | -0.01463300 | 0.09937300  | -0.70986900 |
| C | 0.01459300  | 0.09933600  | 0.70982000  |
| C | 0.07048600  | 1.36007400  | 1.50898700  |
| C | 0.38878400  | 2.60585700  | 0.66266900  |
| C | -0.38874300 | 2.60590500  | -0.66258200 |
| C | -0.07048300 | 1.36015700  | -1.50896800 |
| H | -0.04017700 | -0.87237300 | -1.19124000 |
| H | 0.04012500  | -0.87243700 | 1.19113600  |
| H | 0.80131500  | 1.22275400  | 2.31328100  |
| H | 1.46438900  | 2.62821600  | 0.45779800  |
| H | -0.14880000 | 3.50461100  | -1.24057100 |
| H | -0.80131000 | 1.22290500  | -2.31327400 |
| H | 0.91042800  | 1.45334800  | -1.99288900 |
| H | -1.46434700 | 2.62828600  | -0.45771200 |
| H | 0.14886900  | 3.50454000  | 1.24070400  |
| H | -0.91041700 | 1.45327400  | 1.99292100  |
| O | -1.93042800 | 0.08633700  | 0.10424400  |
| O | 1.93043400  | 0.08630800  | -0.10432300 |
| C | -2.51258400 | -1.09966100 | -0.06154500 |
| C | 2.51258000  | -1.09967700 | 0.06153100  |
| C | 4.00825800  | -1.05813300 | -0.21627400 |
| H | 4.18126400  | -0.79670300 | -1.26518400 |
| H | 4.48448600  | -0.28592200 | 0.39514500  |
| H | 4.44799100  | -2.03273400 | -0.00095500 |
| O | 1.92941100  | -2.11963700 | 0.40286700  |
| C | -4.00827100 | -1.05812200 | 0.21626000  |
| H | -4.48450400 | -0.28590500 | -0.39514600 |
| H | -4.44799100 | -2.03272500 | 0.00092400  |
| H | -4.18128300 | -0.79671700 | 1.26517500  |
| O | -1.92941300 | -2.11964200 | -0.40282300 |

IRC for **TS23** [R/R' = OC(O)Ph]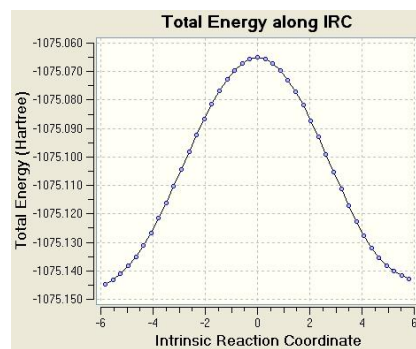Cartesian coordinates for **S24** (R/R' = Br)

|   |             |             |             |
|---|-------------|-------------|-------------|
| C | -0.47270200 | -0.32355700 | 0.59808500  |
| C | 0.47271000  | -0.32355400 | -0.59809100 |
| C | 0.44660300  | 0.96493300  | -1.41692100 |
| C | 0.53547600  | 2.23104100  | -0.55186900 |
| C | -0.53553600 | 2.23103600  | 0.55187100  |
| C | -0.44659900 | 0.96492700  | 1.41692600  |
| H | 1.24701500  | 0.93656500  | -2.16209100 |
| H | 0.30475700  | -1.19770900 | -1.22382300 |
| H | -0.30474000 | -1.19771300 | 1.22381400  |
| H | 1.53268400  | 2.29600500  | -0.09882400 |
| H | 0.42028200  | 3.11333800  | -1.19142500 |
| H | -0.42036800 | 3.11334400  | 1.19141500  |
| H | -1.53275000 | 2.29594900  | 0.09883500  |
| H | 0.50371600  | 0.96499200  | 1.96797700  |
| H | -1.24696900 | 0.93652700  | 2.16213800  |

|    |             |             |             |
|----|-------------|-------------|-------------|
| H  | -0.50367800 | 0.96497000  | -1.96803100 |
| Br | 2.31312700  | -0.66706700 | 0.12347400  |
| Br | -2.31311800 | -0.66708200 | -0.12347400 |

Cartesian coordinates for **TS24** (R/R' = Br)

|    |             |             |             |
|----|-------------|-------------|-------------|
| C  | -0.00987800 | -0.31792200 | 0.71410300  |
| C  | 0.00986200  | -0.31790900 | -0.71412300 |
| C  | -0.02910400 | 0.95170900  | -1.51934200 |
| C  | -0.36587500 | 2.19503800  | -0.67595300 |
| C  | 0.36632900  | 2.19492000  | 0.67599400  |
| C  | 0.02916900  | 0.95168200  | 1.51934100  |
| H  | -0.00404600 | -1.26909900 | 1.22684600  |
| H  | 0.00392900  | -1.26907700 | -1.22688400 |
| H  | -0.75539200 | 0.81405300  | -2.32701200 |
| H  | -1.44768700 | 2.23120300  | -0.50793400 |
| H  | 0.10011800  | 3.09158300  | 1.24523800  |
| H  | 0.75527100  | 0.81391500  | 2.32716000  |
| H  | -0.94918400 | 1.05952900  | 2.00003500  |
| H  | 1.44815400  | 2.23077800  | 0.50799900  |
| H  | -0.09941900 | 3.09163400  | -1.24518600 |
| H  | 0.94916700  | 1.05935600  | -2.00024600 |
| Br | 2.37817500  | -0.65433700 | -0.02910200 |
| Br | -2.37828700 | -0.65420500 | 0.02909800  |

IRC for **TS24** (R/R' = Br)

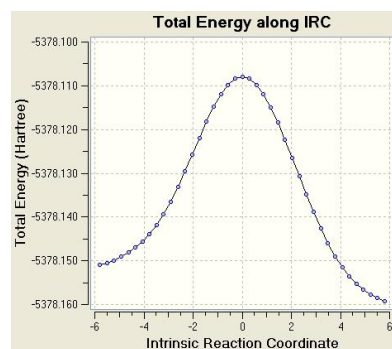

Cartesian coordinates for **S25** (R/R' = CHCH<sub>2</sub>)

|   |             |             |             |
|---|-------------|-------------|-------------|
| C | 0.64739000  | -0.49777900 | -0.44323000 |
| C | -0.64739000 | -0.49777900 | 0.44323000  |
| C | -0.75838700 | 0.80917400  | 1.27198800  |
| C | -0.64453600 | 2.08269900  | 0.41797100  |
| C | 0.64453600  | 2.08269900  | -0.41797100 |
| C | 0.75838700  | 0.80917400  | -1.27198800 |
| H | -1.70471100 | 0.80357700  | 1.82568900  |
| H | -0.56239000 | -1.33687500 | 1.14542200  |
| H | 0.56239000  | -1.33687500 | -1.14542200 |
| H | -1.51248100 | 2.16393600  | -0.25078900 |
| H | -0.67611400 | 2.96598500  | 1.06768600  |
| H | 0.67611400  | 2.96598600  | -1.06768600 |
| H | 1.51248100  | 2.16393700  | 0.25078900  |
| H | -0.04042600 | 0.81566300  | -2.02592400 |
| H | 1.70471100  | 0.80357800  | -1.82568900 |
| H | 0.04042600  | 0.81566300  | 2.02592400  |
| C | 1.88192600  | -0.74184800 | 0.39099300  |
| C | -1.88192600 | -0.74184900 | -0.39099300 |
| C | 2.68562200  | -1.80319500 | 0.26574500  |
| C | -2.68562200 | -1.80319600 | -0.26574500 |
| H | 2.49208000  | -2.58122600 | -0.47019900 |
| H | -2.49207900 | -2.58122700 | 0.47019900  |
| H | 3.56373800  | -1.93079700 | 0.89257000  |

|   |             |             |             |
|---|-------------|-------------|-------------|
| H | -3.56373700 | -1.93079700 | -0.89257000 |
| H | 2.12689700  | 0.00543700  | 1.14576300  |
| H | -2.12689800 | 0.00543700  | -1.14576300 |

Cartesian coordinates for **TS25** (R/R' = CHCH<sub>2</sub>)

|   |             |             |             |
|---|-------------|-------------|-------------|
| C | 0.26359800  | -0.58317400 | 0.64446400  |
| C | 0.32492200  | -0.54285500 | -0.73122900 |
| C | -0.09159000 | 0.65647100  | -1.53945500 |
| C | -0.86617000 | 1.69889500  | -0.71548100 |
| C | -0.24751400 | 1.90613800  | 0.67556900  |
| C | -0.17582500 | 0.59171400  | 1.47275500  |
| H | 0.53402100  | -1.50142100 | 1.15144600  |
| H | 0.65015600  | -1.43020400 | -1.26096100 |
| H | -0.69807500 | 0.30323100  | -2.38042100 |
| H | -1.90273000 | 1.36163400  | -0.60805300 |
| H | -0.82950300 | 2.64201000  | 1.24163700  |
| H | 0.50134300  | 0.69074900  | 2.32867700  |
| H | -1.15824800 | 0.33688700  | 1.88897600  |
| H | 0.76131700  | 2.32195500  | 0.56859600  |
| H | -0.89442200 | 2.64881500  | -1.26097100 |
| H | 0.81397300  | 1.09623400  | -1.97750800 |
| C | 2.36976800  | -0.06039400 | 0.04209500  |
| C | -1.71942800 | -1.60805400 | -0.16796000 |
| H | 2.70832400  | 0.97781100  | 0.09581700  |
| C | 3.22147100  | -1.08444200 | 0.04990400  |
| H | 2.87443000  | -2.12011600 | -0.00600800 |
| H | -1.56831200 | -2.62765800 | -0.54469500 |
| C | -2.93664100 | -1.23886400 | 0.23788000  |
| H | -3.14297400 | -0.24642200 | 0.64714700  |
| H | 4.30773000  | -0.96930600 | 0.10843500  |
| H | -3.81257700 | -1.89681600 | 0.19663600  |

IRC for **TS25** (R/R' = CHCH<sub>2</sub>)

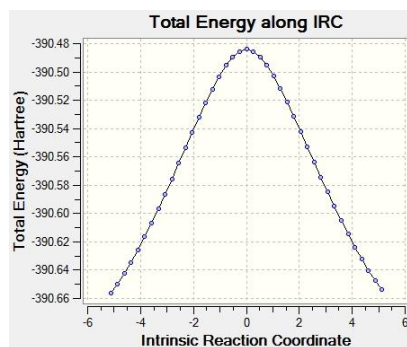

Cartesian coordinates for **S26** [R/R' = C(CH<sub>3</sub>)CH<sub>2</sub>]

|   |             |             |             |
|---|-------------|-------------|-------------|
| C | 0.54269700  | -0.33979100 | -0.57557300 |
| C | -0.54266500 | -0.33982900 | 0.57559100  |
| C | -0.70214100 | 1.02405600  | 1.31022900  |
| C | -0.63815300 | 2.27651700  | 0.42377300  |
| C | 0.63796800  | 2.27657300  | -0.42377500 |
| C | 0.70208000  | 1.02410400  | -1.31021300 |
| H | -1.63759800 | 1.00599400  | 1.88286900  |
| H | -0.18335100 | -1.04910100 | 1.32918300  |
| H | 0.18341700  | -1.04907800 | -1.32916600 |
| H | -1.51161900 | 2.33247400  | -0.23778700 |
| H | -0.67553900 | 3.16991800  | 1.05962800  |
| H | 0.67526700  | 3.16996800  | -1.05964200 |
| H | 1.51142700  | 2.33262500  | 0.23778600  |
| H | -0.10210100 | 1.10620700  | -2.05340800 |
| H | 1.63754700  | 1.00611500  | -1.88284000 |

|   |             |             |             |
|---|-------------|-------------|-------------|
| H | 0.10204500  | 1.10623100  | 2.05341000  |
| C | 1.86984000  | -0.92377700 | -0.09764800 |
| C | -1.86977100 | -0.92387200 | 0.09764300  |
| C | 2.31367300  | -2.08247600 | -0.60818100 |
| C | -2.31355600 | -2.08260100 | 0.60815000  |
| C | -2.67428200 | -0.19219500 | -0.95236100 |
| C | 2.67432800  | -0.19209300 | 0.95236900  |
| H | -3.02666600 | 0.77838400  | -0.58433500 |
| H | -2.08070400 | 0.00774600  | -1.85188000 |
| H | -3.55093000 | -0.77461300 | -1.24982200 |
| H | 2.08074700  | 0.00780900  | 1.85189400  |
| H | 3.55099600  | -0.77448800 | 1.24981400  |
| H | 3.02667900  | 0.77850300  | 0.58436100  |
| H | -3.25134900 | -2.52607600 | 0.28305700  |
| H | -1.75338800 | -2.62525700 | 1.36497000  |
| H | 1.75352300  | -2.62514200 | -1.36500800 |
| H | 3.25148800  | -2.52591500 | -0.28310500 |

Cartesian coordinates for **TS26** [R/R' = C(CH<sub>3</sub>)CH<sub>2</sub>]

|   |             |             |             |
|---|-------------|-------------|-------------|
| C | -0.03919500 | 0.32090600  | -0.72976200 |
| C | -0.03762400 | 0.44423600  | 0.63998000  |
| C | 0.04748400  | -0.73452600 | 1.56963800  |
| C | -0.22025200 | -2.07507300 | 0.86726900  |
| C | 0.49571800  | -2.15798100 | -0.48953600 |
| C | 0.10079000  | -1.00215300 | -1.42826900 |
| H | -0.13564600 | 1.21309900  | -1.33650000 |
| H | -0.12712100 | 1.43218500  | 1.07396100  |
| H | -0.66137700 | -0.58036100 | 2.39086500  |
| H | -1.29981000 | -2.18846900 | 0.72459700  |
| H | 0.27291400  | -3.11373400 | -0.97711900 |
| H | 0.83423000  | -0.89111100 | -2.23588400 |
| H | -0.85717200 | -1.20960600 | -1.92112000 |
| H | 1.57814600  | -2.13595200 | -0.32537000 |
| H | 0.10349100  | -2.89882400 | 1.51342600  |
| H | 1.04688300  | -0.72639700 | 2.02521400  |
| C | 2.15014200  | 0.93231400  | -0.05927300 |
| C | -2.31618700 | 0.55426900  | -0.07471200 |
| C | 2.24180700  | 2.25767800  | -0.16166600 |
| H | 1.36316500  | 2.90416900  | -0.21921000 |
| C | -3.17206100 | -0.38895900 | -0.46414000 |
| H | -2.86967300 | -1.40403700 | -0.71944700 |
| H | 3.20382000  | 2.78369100  | -0.19419400 |
| H | -4.24928800 | -0.19359400 | -0.55564900 |
| C | 3.32158600  | 0.00275100  | 0.01535600  |
| C | -2.69560000 | 1.96518600  | 0.25233300  |
| H | 4.27925700  | 0.55043500  | 0.04066200  |
| H | 3.28233200  | -0.63390000 | 0.90902700  |
| H | 3.35353700  | -0.67419500 | -0.84804000 |
| H | -2.07778500 | 2.68950400  | -0.29794100 |
| H | -3.74869900 | 2.18111300  | 0.01030500  |
| H | -2.55085200 | 2.18409800  | 1.31911500  |

Cartesian coordinates for **S27** [R/R' = C(O)H]

|   |             |             |             |
|---|-------------|-------------|-------------|
| C | -0.37956600 | -0.83149600 | 0.25228800  |
| C | 0.73651900  | -0.43345100 | -0.74290600 |
| C | 0.56924000  | 1.00295100  | -1.29109100 |
| C | 0.37470900  | 2.03175800  | -0.16672000 |
| C | -0.80961200 | 1.64946300  | 0.73315700  |
| C | -0.63526700 | 0.24152100  | 1.32543100  |
| H | 1.43882600  | 1.26160200  | -1.90949500 |
| H | 0.71747200  | -1.12292400 | -1.60683300 |
| H | -0.03780000 | -1.75623800 | 0.74657800  |

|   |             |             |             |
|---|-------------|-------------|-------------|
| H | 1.29100600  | 2.09531500  | 0.43884900  |
| H | 0.22088800  | 3.02626400  | -0.60175400 |
| H | -0.91611700 | 2.37724800  | 1.54605300  |
| H | -1.73937600 | 1.68993400  | 0.15190900  |
| H | 0.21368600  | 0.23840000  | 2.01928600  |
| H | -1.52385200 | -0.03670400 | 1.90059200  |
| H | -0.30117700 | 1.02623700  | -1.95934600 |
| C | -1.62538200 | -1.24678700 | -0.50592800 |
| C | 2.12687600  | -0.64139200 | -0.16164100 |
| O | -2.75881000 | -0.89407400 | -0.25518900 |
| O | 2.38149200  | -1.26700000 | 0.84560800  |
| H | -1.43831300 | -1.95834600 | -1.34431600 |
| H | 2.94819300  | -0.18759700 | -0.76040800 |

Cartesian coordinates for **TS27** [R/R' = C(O)H]

|   |             |             |             |
|---|-------------|-------------|-------------|
| C | -0.19365100 | -0.64798600 | -0.59085100 |
| C | -0.30121800 | -0.54924200 | 0.76572800  |
| C | 0.05261900  | 0.69164300  | 1.53249000  |
| C | 0.82773200  | 1.71945400  | 0.68956800  |
| C | 0.24755500  | 1.83535200  | -0.72764300 |
| C | 0.28141100  | 0.47938500  | -1.45427000 |
| H | -0.45643900 | -1.58984700 | -1.06389700 |
| H | -0.65945400 | -1.41076000 | 1.32177800  |
| H | 0.62511700  | 0.40698500  | 2.42450400  |
| H | 1.87708800  | 1.41159500  | 0.62113500  |
| H | 0.80758000  | 2.57710700  | -1.30727400 |
| H | -0.31300400 | 0.50958200  | -2.37598900 |
| H | 1.31147600  | 0.24140700  | -1.76294000 |
| H | -0.78824200 | 2.19503500  | -0.67279800 |
| H | 0.81191200  | 2.69385300  | 1.19018600  |
| H | -0.88407700 | 1.12742400  | 1.91337200  |
| C | 2.07367100  | -1.53448000 | 0.27886300  |
| O | 2.98897200  | -1.08075900 | -0.34962100 |
| H | 2.21010400  | -2.50303400 | 0.85707600  |
| C | -2.67105700 | -0.16755100 | -0.11242800 |
| O | -3.41058400 | -1.10438600 | -0.03197200 |
| H | -3.07154200 | 0.86235300  | -0.38115900 |

IRC for **TS27** [R/R' = C(O)H]

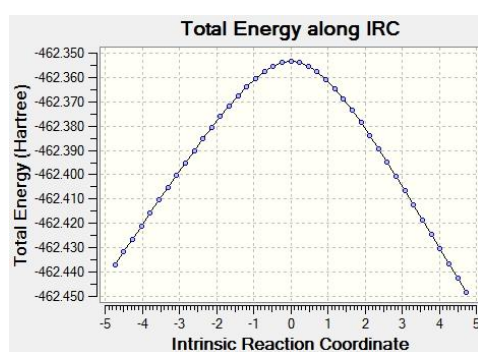

Cartesian coordinates for **S28** [R/R' = C(O)CH<sub>3</sub>]

|   |             |             |             |
|---|-------------|-------------|-------------|
| C | 0.53850800  | -0.40200000 | -0.56469400 |
| C | -0.53870000 | -0.40186900 | 0.56470700  |
| C | -0.46303900 | 0.88405700  | 1.40938500  |
| C | -0.53087500 | 2.16082700  | 0.55476500  |
| C | 0.53145600  | 2.16065800  | -0.55469500 |
| C | 0.46308000  | 0.88394500  | -1.40935400 |
| H | -1.27380000 | 0.87929900  | 2.14393500  |
| H | -0.34967100 | -1.26840500 | 1.21676200  |
| H | 0.34931600  | -1.26851600 | -1.21671600 |

|   |             |             |             |
|---|-------------|-------------|-------------|
| H | -1.53196000 | 2.24173100  | 0.11570300  |
| H | -0.39962100 | 3.03737600  | 1.20056300  |
| H | 0.40049500  | 3.03726900  | -1.20047000 |
| H | 1.53259100  | 2.24118500  | -0.11567600 |
| H | -0.48160000 | 0.87392500  | -1.97101600 |
| H | 1.27375000  | 0.87892600  | -2.14399300 |
| H | 0.48155100  | 0.87368600  | 1.97118400  |
| C | 1.95357500  | -0.67345400 | -0.02662400 |
| C | -1.95370800 | -0.67316700 | 0.02654100  |
| O | 2.90526900  | 0.01451900  | -0.35305500 |
| O | -2.90533500 | 0.01505900  | 0.35258700  |
| C | 2.15311600  | -1.87035300 | 0.89180200  |
| C | -2.15334700 | -1.87036700 | -0.89148400 |
| H | 3.20249600  | -2.16864400 | 0.86109300  |
| H | 1.90801700  | -1.59089400 | 1.92377800  |
| H | 1.51391000  | -2.71663500 | 0.61978600  |
| H | -1.51410800 | -2.71656000 | -0.61922900 |
| H | -3.20270900 | -2.16873300 | -0.86043300 |
| H | -1.90852700 | -1.59129600 | -1.92361800 |

Cartesian coordinates for **TS28** [R/R' = C(O)CH<sub>3</sub>]

|   |             |             |             |
|---|-------------|-------------|-------------|
| C | 0.01346200  | -0.46025900 | 0.68143700  |
| C | -0.01311100 | -0.46070300 | -0.68067200 |
| C | 0.01781700  | 0.79316100  | -1.49989100 |
| C | -0.34871100 | 2.04595500  | -0.68543700 |
| C | 0.34780900  | 2.04658200  | 0.68464200  |
| C | -0.01796800 | 0.79408300  | 1.49990400  |
| H | 0.01051800  | -1.41196700 | 1.20468500  |
| H | -0.00984500 | -1.41273900 | -1.20332400 |
| H | -0.64314100 | 0.68291700  | -2.36849700 |
| H | -1.43480000 | 2.07911300  | -0.53882800 |
| H | 0.07248100  | 2.94464000  | 1.24893000  |
| H | 0.64319900  | 0.68468600  | 2.36846300  |
| H | -1.03936200 | 0.88609300  | 1.90188300  |
| H | 1.43389000  | 2.08024700  | 0.53800100  |
| H | -0.07387000 | 2.94381400  | -1.25028000 |
| H | 1.03921500  | 0.88550500  | -1.90167000 |
| C | 2.60091300  | -0.63927300 | -0.12641000 |
| C | -2.60059000 | -0.63965200 | 0.12656700  |
| O | -3.17686600 | 0.07138100  | 0.90368700  |
| O | 3.17697900  | 0.07171900  | -0.90370900 |
| C | -3.28796000 | -1.71133600 | -0.71273600 |
| H | -2.82113000 | -2.67907500 | -0.50100200 |
| H | -4.36545400 | -1.75350900 | -0.50329300 |
| H | -3.11579600 | -1.49392900 | -1.77218600 |
| C | 3.28829500  | -1.71106900 | 0.71271700  |
| H | 3.11767300  | -1.49263300 | 1.77221500  |
| H | 2.82028800  | -2.67852800 | 0.50235900  |
| H | 4.36549700  | -1.75438600 | 0.50200600  |

IRC for **TS28** [R/R' = C(O)CH<sub>3</sub>]

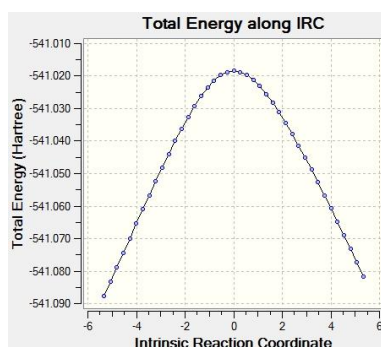

Cartesian coordinates for **S29** [R/R' = C(O)NH<sub>2</sub>]

|   |             |             |             |
|---|-------------|-------------|-------------|
| C | -0.60683900 | -0.46981500 | 0.47798800  |
| C | 0.60694900  | -0.47011900 | -0.47756500 |
| C | 0.68114300  | 0.83501100  | -1.31151000 |
| C | 0.62648800  | 2.10078300  | -0.44456800 |
| C | -0.62685500 | 2.10104900  | 0.44276400  |
| C | -0.68132000 | 0.83600700  | 1.31079600  |
| H | 1.58273600  | 0.84351200  | -1.93497800 |
| H | 0.46900300  | -1.29689300 | -1.18628200 |
| H | -0.46877900 | -1.29595600 | 1.18741800  |
| H | 1.52247900  | 2.16082100  | 0.18950700  |
| H | 0.63801600  | 2.98811400  | -1.08898500 |
| H | -0.63850600 | 2.98892600  | 1.08642100  |
| H | -1.52284800 | 2.16042700  | -0.19137200 |
| H | 0.17033200  | 0.82744800  | 1.99948200  |
| H | -1.58294200 | 0.84485300  | 1.93422700  |
| H | -0.17054500 | 0.82571900  | -2.00015100 |
| C | 1.89787900  | -0.78171100 | 0.29610600  |
| C | -1.89771500 | -0.78236000 | -0.29542300 |
| O | 1.92831800  | -1.01608800 | 1.50191600  |
| O | -1.92797000 | -1.01876900 | -1.50086800 |
| N | 3.04296100  | -0.80726400 | -0.45310400 |
| N | -3.04296200 | -0.80635500 | 0.45360400  |
| H | -3.89370900 | -1.10609800 | 0.00003500  |
| H | 3.03240800  | -0.73811300 | -1.45823700 |
| H | 3.89375600  | -1.10624200 | 0.00088200  |
| H | -3.03255400 | -0.73540800 | 1.45861800  |

Cartesian coordinates for **TS29** [R/R' = C(O)NH<sub>2</sub>]

|   |             |             |             |
|---|-------------|-------------|-------------|
| C | -0.04056900 | -0.41883200 | 0.64896800  |
| C | -0.03072000 | -0.33658300 | -0.71737400 |
| C | 0.08386900  | 0.96478400  | -1.45362000 |
| C | -0.17824400 | 2.18443100  | -0.55304200 |
| C | 0.53966400  | 2.04601400  | 0.79746900  |
| C | 0.09454200  | 0.77780600  | 1.54697300  |
| H | -0.16328100 | -1.39409000 | 1.10821600  |
| H | -0.13121700 | -1.25170600 | -1.29115700 |
| H | -0.59981500 | 0.95057800  | -2.31091400 |
| H | -1.25940800 | 2.29091700  | -0.38912500 |
| H | 0.35193600  | 2.92689800  | 1.42150400  |
| H | 0.79981100  | 0.53715700  | 2.35195400  |
| H | -0.87703700 | 0.92873000  | 2.04049000  |
| H | 1.61910100  | 1.99589900  | 0.62108100  |
| H | 0.14905200  | 3.09556800  | -1.06537300 |
| H | 1.09956800  | 1.01972900  | -1.87082300 |
| C | -2.45493300 | -0.83281400 | -0.01378000 |
| C | 2.36747900  | -0.72929800 | -0.07755000 |
| N | 2.67259300  | -2.03753600 | 0.10088900  |
| O | 3.17611600  | 0.15244800  | -0.28667800 |
| H | 1.94598600  | -2.72051800 | 0.24337700  |
| H | 3.63774300  | -2.35984400 | 0.04745600  |
| O | -2.62751900 | -2.03733400 | -0.03939200 |
| N | -3.46446300 | 0.07845400  | -0.00770900 |
| H | -4.43801300 | -0.22473500 | -0.02825700 |
| H | -3.26663300 | 1.06502800  | 0.00961000  |

IRC for **TS29** [R/R' = C(O)NH<sub>2</sub>]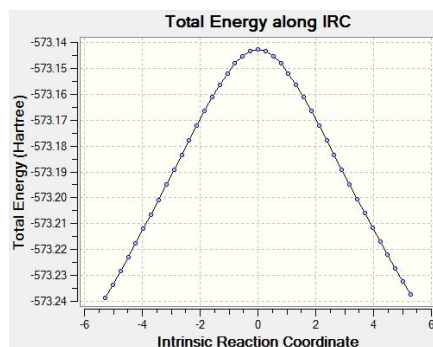Cartesian coordinates for **S30** [R/R' = C(O)NHPH]

|   |             |             |             |
|---|-------------|-------------|-------------|
| C | 0.32467500  | 0.78290900  | -0.64012100 |
| C | -0.23757200 | 0.77832000  | 0.81626900  |
| C | -0.05020900 | 2.16111900  | 1.48439300  |
| C | -0.67632800 | 3.28913900  | 0.65338500  |
| C | -0.07060300 | 3.33820700  | -0.75600400 |
| C | -0.18608300 | 1.98216500  | -1.47353400 |
| H | -0.48703700 | 2.12009700  | 2.48510900  |
| H | 0.33430400  | 0.05219300  | 1.40990700  |
| H | 0.02251400  | -0.14853300 | -1.14326600 |
| H | -1.76417600 | 3.14034000  | 0.59431700  |
| H | -0.52379900 | 4.24808400  | 1.16231300  |
| H | -0.57131800 | 4.10411500  | -1.36056500 |
| H | 0.98564900  | 3.61671700  | -0.69126300 |
| H | -1.24206600 | 1.80829800  | -1.72071100 |
| H | 0.35869000  | 2.01251000  | -2.42256500 |
| H | 1.02443100  | 2.34805100  | 1.60104900  |
| C | -1.69592200 | 0.30081300  | 1.02231600  |
| C | 1.86804800  | 0.72857600  | -0.62442400 |
| O | -2.18869400 | 0.35055900  | 2.14500900  |
| O | 2.57361000  | 1.67966100  | -0.93847200 |
| N | -2.36109400 | -0.21259400 | -0.06426700 |
| N | 2.37194900  | -0.49447600 | -0.23944300 |
| H | -1.87903700 | -0.17237100 | -0.94906400 |
| C | -3.66452600 | -0.75970900 | -0.14092500 |
| C | -4.52333500 | -0.88374500 | 0.96254100  |
| C | -4.09503900 | -1.19726800 | -1.40561300 |
| C | -5.79172300 | -1.44188300 | 0.78118800  |
| H | -4.19624700 | -0.54564500 | 1.93520000  |
| C | -5.36286100 | -1.75074000 | -1.56946800 |
| H | -3.43320800 | -1.10268200 | -2.26418700 |
| C | -6.22181400 | -1.87730100 | -0.47375500 |
| H | -6.44929500 | -1.53321900 | 1.64095900  |
| H | -5.67728200 | -2.08219500 | -2.55476900 |
| H | -7.21051100 | -2.30797800 | -0.59841400 |
| H | 1.68975200  | -1.21018100 | -0.02913000 |
| C | 3.71618400  | -0.90934100 | -0.08985700 |
| C | 3.93190700  | -2.23305300 | 0.33057100  |
| C | 4.81707100  | -0.07517600 | -0.34098900 |
| C | 5.22647600  | -2.71984600 | 0.49716500  |
| H | 3.08166900  | -2.88264500 | 0.52822500  |
| C | 6.10902400  | -0.57891800 | -0.16794900 |
| H | 4.65473500  | 0.94233200  | -0.66637200 |
| C | 6.32652000  | -1.89381300 | 0.24838900  |
| H | 5.37282400  | -3.74555300 | 0.82272700  |
| H | 6.95445900  | 0.07405400  | -0.36497800 |
| H | 7.33629500  | -2.27077700 | 0.37767600  |



Cartesian coordinates for **TS30** [R/R' = C(O)NHPH]

|   |             |             |             |
|---|-------------|-------------|-------------|
| C | 0.11235000  | 0.64002500  | 0.67540300  |
| C | -0.11226600 | 0.64003200  | -0.67545500 |
| C | -0.19017700 | 1.89376400  | -1.48797300 |
| C | -0.44021400 | 3.14637800  | -0.62957500 |
| C | 0.44022500  | 3.14637400  | 0.62957500  |
| C | 0.19019600  | 1.89374200  | 1.48795000  |
| H | 0.17342300  | -0.31303000 | 1.19339700  |
| H | -0.17331000 | -0.31301300 | -1.19347200 |
| H | -0.95817500 | 1.78267500  | -2.26268500 |
| H | -1.49519400 | 3.18094200  | -0.33565300 |
| H | 0.24115800  | 4.04158500  | 1.22870600  |
| H | 0.95816400  | 1.78266400  | 2.26269200  |
| H | -0.77425900 | 1.97887500  | 2.01337400  |
| H | 1.49520500  | 3.18095800  | 0.33565500  |
| H | -0.24115900 | 4.04160100  | -1.22869100 |
| H | 0.77424700  | 1.97893800  | -2.01344500 |
| C | 2.45707200  | 0.50865400  | -0.46864600 |
| C | -2.45705900 | 0.50863600  | 0.46865200  |
| O | -2.96507200 | 1.29689200  | 1.24529200  |
| O | 2.96517400  | 1.29705700  | -1.24508600 |
| N | -3.12044500 | -0.50064700 | -0.17987200 |
| N | 3.12039400  | -0.50075200 | 0.17974900  |
| H | -2.54509600 | -1.06332900 | -0.78977300 |
| H | 2.54499200  | -1.06352700 | 0.78951400  |
| C | 4.49225200  | -0.87186900 | 0.13380600  |
| C | 4.89694700  | -1.96392700 | 0.91902500  |
| C | 5.43649000  | -0.19546500 | -0.65276300 |
| C | 6.22808600  | -2.37704800 | 0.91890400  |
| H | 4.16691200  | -2.48951000 | 1.53102600  |
| C | 6.76715200  | -0.62183100 | -0.64265700 |
| H | 5.12657700  | 0.64623900  | -1.25750100 |
| C | 7.17362500  | -1.70743800 | 0.13652300  |
| H | 6.52441800  | -3.22323400 | 1.53217400  |
| H | 7.49157000  | -0.09227700 | -1.25484400 |
| H | 8.21088900  | -2.02777400 | 0.13561700  |
| C | -4.49229300 | -0.87180500 | -0.13385800 |
| C | -5.43650100 | -0.19547200 | 0.65280800  |
| C | -4.89700900 | -1.96381700 | -0.91913000 |
| C | -6.76715100 | -0.62187600 | 0.64275800  |
| H | -5.12657200 | 0.64620000  | 1.25758000  |
| C | -6.22813700 | -2.37697200 | -0.91895700 |
| H | -4.16699700 | -2.48933900 | -1.53121200 |
| C | -7.17364500 | -1.70744100 | -0.13647000 |
| H | -7.49154600 | -0.09238100 | 1.25502200  |
| H | -6.52448600 | -3.22312400 | -1.53226700 |
| H | -8.21090000 | -2.02780200 | -0.13552300 |

IRC for **TS30** [R/R' = C(O)NHPH]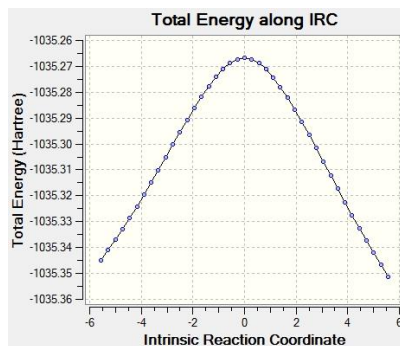

Cartesian coordinates for **S31** [R/R' = C(O)OCH<sub>3</sub>]

|   |             |             |             |
|---|-------------|-------------|-------------|
| C | 0.41808200  | -0.13535400 | -0.65581600 |
| C | -0.41814400 | -0.13528700 | 0.65559100  |
| C | -0.19285400 | 1.15272600  | 1.47117300  |
| C | -0.42297200 | 2.42589100  | 0.64061000  |
| C | 0.42382200  | 2.42578000  | -0.64061600 |
| C | 0.19320400  | 1.15276700  | -1.47126300 |
| H | -0.84690800 | 1.14551300  | 2.34787300  |
| H | -0.09988100 | -0.99785600 | 1.25413900  |
| H | 0.09959800  | -0.99778600 | -1.25443700 |
| H | -1.48739300 | 2.49853200  | 0.38431500  |
| H | -0.18766200 | 3.30712200  | 1.24949800  |
| H | 0.18882000  | 3.30712000  | -1.24946500 |
| H | 1.48827100  | 2.49800200  | -0.38432000 |
| H | -0.84110900 | 1.14017000  | -1.84080600 |
| H | 0.84723400  | 1.14540100  | -2.34797800 |
| H | 0.84143500  | 1.13979100  | 1.84076300  |
| C | 1.90376300  | -0.38354200 | -0.40176600 |
| C | -1.90393900 | -0.38310000 | 0.40172100  |
| O | 2.81712900  | 0.18228300  | -0.96823000 |
| O | -2.81705000 | 0.18246200  | 0.96884100  |
| O | -2.10757600 | -1.37448200 | -0.49844300 |
| O | 2.10710700  | -1.37532700 | 0.49797300  |
| C | -3.48170400 | -1.73559600 | -0.73976900 |
| H | -4.03945400 | -0.87842100 | -1.12404100 |
| H | -3.44535300 | -2.53519500 | -1.47919000 |
| H | -3.95097700 | -2.08364700 | 0.18349500  |
| C | 3.48112400  | -1.73597600 | 0.73990000  |
| H | 3.44480800  | -2.53495000 | 1.47999000  |
| H | 3.95066800  | -2.08479200 | -0.18297500 |
| H | 4.03873700  | -0.87835300 | 1.12342200  |

Cartesian coordinates for **TS31** [R/R' = C(O)OCH<sub>3</sub>]

|   |             |             |             |
|---|-------------|-------------|-------------|
| C | -0.02232400 | -0.07026900 | -0.68885300 |
| C | 0.02237800  | -0.07079000 | 0.68806800  |
| C | 0.05855100  | 1.18751300  | 1.50241700  |
| C | 0.38695100  | 2.43560200  | 0.66396500  |
| C | -0.38711800 | 2.43605300  | -0.66289800 |
| C | -0.05846100 | 1.18864100  | -1.50226300 |
| H | -0.04099000 | -1.02838100 | -1.19693800 |
| H | 0.04108600  | -1.02930900 | 1.19540100  |
| H | 0.77965300  | 1.05639700  | 2.31796900  |
| H | 1.46306600  | 2.45769900  | 0.46064300  |
| H | -0.14633700 | 3.33473100  | -1.24092500 |
| H | -0.77936700 | 1.05808000  | -2.31807700 |
| H | 0.92685100  | 1.29019600  | -1.97896900 |
| H | -1.46326300 | 2.45779800  | -0.45966100 |
| H | 0.14605300  | 3.33380400  | 1.24268000  |
| H | -0.92663600 | 1.28863400  | 1.97941400  |
| C | -2.30949600 | -0.27860800 | 0.09735700  |
| C | 2.30956100  | -0.27852600 | -0.09780300 |
| O | 3.16699000  | 0.53840100  | -0.34486700 |
| O | -3.16681500 | 0.53845500  | 0.34450300  |
| O | 2.56013600  | -1.58686400 | 0.15025700  |
| O | -2.56021600 | -1.58695700 | -0.15038200 |
| C | -3.95555500 | -2.00435000 | -0.11024000 |
| C | 3.95543200  | -2.00437700 | 0.11048600  |
| H | -3.94487900 | -3.07238000 | -0.32541400 |
| H | -4.37686100 | -1.81072700 | 0.87886000  |
| H | -4.53168600 | -1.46145100 | -0.86303000 |
| H | 3.94465000  | -3.07232600 | 0.32605100  |
| H | 4.37687900  | -1.81115200 | -0.87864000 |

H 4.53150900 -1.46123200 0.86314000

IRC for **TS31** [R/R' = C(O)OCH<sub>3</sub>]

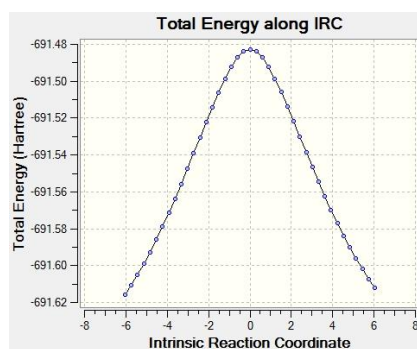

Cartesian coordinates for **S32** [R/R' = C(O)OH]

|   |             |             |             |
|---|-------------|-------------|-------------|
| C | 0.54799500  | -0.44856000 | -0.55271300 |
| C | -0.54803900 | -0.44853300 | 0.55274700  |
| C | -0.50072700 | 0.83844600  | 1.39804800  |
| C | -0.54770600 | 2.11248900  | 0.53897100  |
| C | 0.54772500  | 2.11246400  | -0.53895100 |
| C | 0.50068500  | 0.83842800  | -1.39805000 |
| H | -1.32745200 | 0.83097400  | 2.11406600  |
| H | -0.37006600 | -1.31454300 | 1.20274900  |
| H | 0.37003900  | -1.31459300 | -1.20268400 |
| H | -1.53525200 | 2.19072800  | 0.06741200  |
| H | -0.44092800 | 2.99167200  | 1.18538200  |
| H | 0.44100500  | 2.99168100  | -1.18532600 |
| H | 1.53528000  | 2.19064400  | -0.06739100 |
| H | -0.42975000 | 0.82323800  | -1.98114700 |
| H | 1.32738800  | 0.83092100  | -2.11409800 |
| H | 0.42969300  | 0.82322800  | 1.98118100  |
| C | 1.93960900  | -0.69397800 | 0.01831100  |
| C | -1.93959100 | -0.69398700 | -0.01836100 |
| O | 2.95760500  | -0.13083700 | -0.32483900 |
| O | -2.95757000 | -0.13052800 | 0.32439400  |
| O | -1.95460200 | -1.68962300 | -0.94538800 |
| O | 1.95460300  | -1.68921600 | 0.94578100  |
| H | 2.88124700  | -1.81127300 | 1.21356600  |
| H | -2.88120200 | -1.81166400 | -1.21331300 |

Cartesian coordinates for **TS32** [R/R' = C(O)OH]

|   |             |             |             |
|---|-------------|-------------|-------------|
| C | -0.00579400 | -0.42941700 | -0.69024600 |
| C | 0.00555700  | -0.43001000 | 0.68971000  |
| C | 0.02249300  | 0.82815500  | 1.50370300  |
| C | 0.37019500  | 2.07682700  | 0.67404500  |
| C | -0.36957500 | 2.07753800  | -0.67244400 |
| C | -0.02238100 | 0.82943100  | -1.50317700 |
| H | -0.01122300 | -1.38765000 | -1.19901200 |
| H | 0.01078100  | -1.38867900 | 1.19766000  |
| H | 0.72248200  | 0.69587700  | 2.33710100  |
| H | 1.45116600  | 2.10178700  | 0.49897000  |
| H | -0.11221900 | 2.97506000  | -1.24469700 |
| H | -0.72251200 | 0.69809100  | -2.33660300 |
| H | 0.97409800  | 0.92895100  | -1.95654300 |
| H | -1.45053800 | 2.10275000  | -0.49733900 |
| H | 0.11317000  | 2.97396500  | 1.24705000  |
| H | -0.97399300 | 0.92768100  | 1.95706100  |
| C | -2.29935100 | -0.63774100 | 0.04220300  |
| C | 2.29916700  | -0.63796100 | -0.04298500 |
| O | 3.16809000  | 0.16337600  | -0.28773300 |

|   |             |             |             |
|---|-------------|-------------|-------------|
| O | -3.16829300 | 0.16387100  | 0.28593600  |
| O | 2.55341400  | -1.94570400 | 0.23462000  |
| O | -2.55357500 | -1.94580700 | -0.23397600 |
| H | 3.52385100  | -2.08730900 | 0.19690900  |
| H | -3.52402000 | -2.08734300 | -0.19618800 |

IRC for **TS32** [R/R' = C(O)OH]

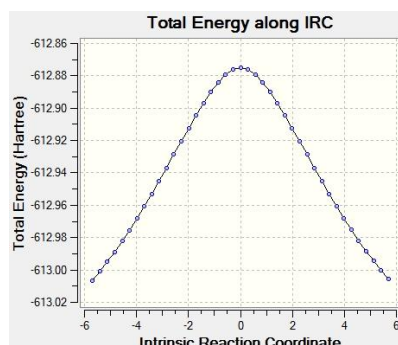

Cartesian coordinates for **S33** [R/R' = C(O)OC(O)CH<sub>3</sub>]

|   |             |             |             |
|---|-------------|-------------|-------------|
| C | 0.28715400  | 0.23621400  | -0.72276900 |
| C | -0.28711100 | 0.23575100  | 0.72262700  |
| C | 0.08965900  | 1.52193900  | 1.48304200  |
| C | -0.29051800 | 2.79660800  | 0.71205600  |
| C | 0.29085800  | 2.79707300  | -0.71042200 |
| C | -0.08945700 | 1.52297600  | -1.48229900 |
| H | -0.38563700 | 1.51444200  | 2.46783600  |
| H | 0.12741900  | -0.63412800 | 1.24802500  |
| H | -0.12750800 | -0.63325500 | -1.24875100 |
| H | -1.38393600 | 2.87588100  | 0.66750400  |
| H | 0.06160100  | 3.67575100  | 1.26422500  |
| H | -0.06115400 | 3.67664100  | -1.26197900 |
| H | 1.38428500  | 2.87617900  | -0.66581700 |
| H | -1.17452600 | 1.50774100  | -1.65269800 |
| H | 0.38582100  | 1.51610900  | -2.46710700 |
| H | 1.17472400  | 1.50645300  | 1.65345400  |
| C | 1.79347400  | -0.00386800 | -0.75281400 |
| C | -1.79346200 | -0.00411900 | 0.75245900  |
| O | 2.57813100  | 0.55604000  | -1.48127300 |
| O | -2.57812800 | 0.55557900  | 1.48107700  |
| O | -2.14373500 | -1.02817900 | -0.09664600 |
| O | 2.14363100  | -1.02840100 | 0.09581000  |
| C | 3.47178300  | -1.45133000 | 0.33281300  |
| O | 3.62764500  | -2.61710300 | 0.56584000  |
| C | 4.54538900  | -0.39946900 | 0.36073600  |
| H | 5.40872700  | -0.81415800 | 0.88203000  |
| H | 4.82038500  | -0.12999900 | -0.66185100 |
| H | 4.20093000  | 0.51291900  | 0.85369700  |
| C | -3.47203500 | -1.45109900 | -0.33304300 |
| C | -4.54507000 | -0.39872400 | -0.36272300 |
| H | -4.19993300 | 0.51280900  | -0.85679100 |
| H | -5.40855400 | -0.81356300 | -0.88365200 |
| H | -4.82016900 | -0.12769100 | 0.65943500  |
| O | -3.62835200 | -2.61716700 | -0.56424900 |

Cartesian coordinates for **TS33** [R/R' = C(O)OC(O)CH<sub>3</sub>]

|   |             |            |             |
|---|-------------|------------|-------------|
| C | 0.04752300  | 0.39522400 | 0.70062400  |
| C | -0.07939100 | 0.46256700 | -0.67245100 |
| C | -0.13995800 | 1.75983300 | -1.41962600 |
| C | -0.42556800 | 2.96612300 | -0.50681800 |
| C | 0.40760500  | 2.90288100 | 0.78226700  |

|   |             |             |             |
|---|-------------|-------------|-------------|
| C | 0.12531000  | 1.61154300  | 1.57022900  |
| H | 0.09463100  | -0.58622800 | 1.16163000  |
| H | -0.13702900 | -0.47072200 | -1.22293800 |
| H | -0.88816400 | 1.67499900  | -2.21642900 |
| H | -1.49118600 | 2.98172400  | -0.25279800 |
| H | 0.18883300  | 3.76832100  | 1.41628200  |
| H | 0.88094700  | 1.44046700  | 2.34598100  |
| H | -0.83614600 | 1.68281900  | 2.09946200  |
| H | 1.47309100  | 2.94806000  | 0.53193900  |
| H | -0.20951900 | 3.89081900  | -1.05205100 |
| H | 0.82955700  | 1.87908700  | -1.92459600 |
| C | 2.28132400  | 0.23205600  | -0.23817300 |
| C | -2.30905700 | 0.19715900  | 0.22124200  |
| O | -3.13714600 | 0.95266200  | 0.65797500  |
| O | 3.08011300  | 1.01945700  | -0.67555000 |
| O | -2.55608600 | -1.12108300 | -0.13770300 |
| O | 2.60989800  | -1.01747700 | 0.26289600  |
| C | 3.91429200  | -1.58473300 | 0.23037100  |
| C | -3.82883300 | -1.75176100 | -0.15548300 |
| O | -3.84066600 | -2.94015500 | 0.01173500  |
| O | 4.24301900  | -2.24711300 | 1.17482000  |
| C | -5.03031100 | -0.89706500 | -0.45011300 |
| C | 4.72251300  | -1.36437100 | -1.01758000 |
| H | 4.10573700  | -1.49274500 | -1.91101000 |
| H | 5.10300500  | -0.33968600 | -1.03119100 |
| H | 5.55175300  | -2.07279200 | -1.02023800 |
| H | -5.27285800 | -0.28496300 | 0.42229700  |
| H | -4.83329500 | -0.20952900 | -1.27647300 |
| H | -5.86509800 | -1.55669500 | -0.69019300 |

IRC for **TS33** [R/R' = C(O)OC(O)CH<sub>3</sub>]

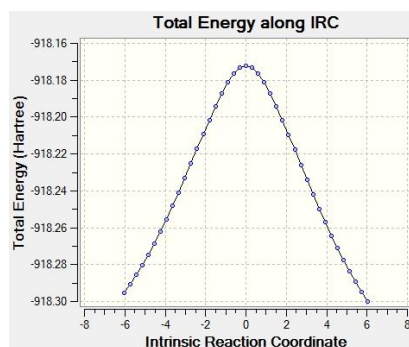

Cartesian coordinates for **S34** [R/R' = C(O)F]

|   |             |             |             |
|---|-------------|-------------|-------------|
| C | 0.54517100  | -0.43817600 | -0.55752100 |
| C | -0.54519100 | -0.43821500 | 0.55753800  |
| C | -0.50037900 | 0.85110100  | 1.40069200  |
| C | -0.54701400 | 2.12426000  | 0.53976400  |
| C | 0.54709400  | 2.12427500  | -0.53964000 |
| C | 0.50036800  | 0.85120200  | -1.40066200 |
| H | -1.32594000 | 0.84298600  | 2.11846800  |
| H | -0.37043700 | -1.31008200 | 1.20089700  |
| H | 0.37048700  | -1.31003900 | -1.20091900 |
| H | -1.53472700 | 2.20661300  | 0.07005500  |
| H | -0.43645000 | 3.00158200  | 1.18703200  |
| H | 0.43658700  | 3.00168000  | -1.18681000 |
| H | 1.53482200  | 2.20654900  | -0.06994100 |
| H | -0.42870100 | 0.83537900  | -1.98555100 |
| H | 1.32591300  | 0.84305700  | -2.11844400 |
| H | 0.42867100  | 0.83518500  | 1.98561100  |
| C | -1.92411800 | -0.67803100 | -0.02272000 |
| C | 1.92411900  | -0.67799400 | 0.02260700  |

|   |             |             |             |
|---|-------------|-------------|-------------|
| O | -2.94324000 | -0.10064200 | 0.18648900  |
| O | 2.94334200  | -0.10089200 | -0.18676400 |
| F | 1.92535100  | -1.76947500 | 0.86345400  |
| F | -1.92550000 | -1.76954300 | -0.86329300 |

Cartesian coordinates for **TS34** [R/R' = C(O)F]

|   |             |             |             |
|---|-------------|-------------|-------------|
| C | -0.00728700 | -0.40360100 | -0.69346000 |
| C | 0.00724900  | -0.40379500 | 0.69325500  |
| C | 0.03826200  | 0.85436700  | 1.50483500  |
| C | 0.37374100  | 2.10421000  | 0.67141500  |
| C | -0.37377400 | 2.10438800  | -0.67090200 |
| C | -0.03823900 | 0.85479100  | -1.50467500 |
| H | -0.01264600 | -1.36379700 | -1.19949200 |
| H | 0.01257600  | -1.36413900 | 1.19901500  |
| H | 0.75041800  | 0.71747500  | 2.32714300  |
| H | 1.45380100  | 2.13610000  | 0.49198300  |
| H | -0.11704800 | 2.99971900  | -1.24585500 |
| H | -0.75033400 | 0.71815000  | -2.32707700 |
| H | 0.94827500  | 0.95232300  | -1.97951400 |
| H | -1.45384600 | 2.13617600  | -0.49146800 |
| H | 0.11697900  | 2.99936800  | 1.24662200  |
| H | -0.94821100 | 0.95177300  | 1.97978800  |
| C | -2.25653300 | -0.62795200 | 0.04685200  |
| C | 2.25652700  | -0.62794900 | -0.04706100 |
| O | 3.16451300  | 0.11667100  | -0.21554900 |
| O | -3.16457500 | 0.11665000  | 0.21498500  |
| F | -2.50567500 | -1.99318400 | -0.15332500 |
| F | 2.50577000  | -1.99309100 | 0.15352700  |

IRC for **TS34** [R/R' = C(O)F]

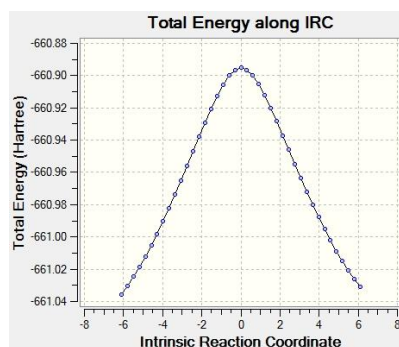

Cartesian coordinates for **S35** [R/R' = C(O)Cl]

|   |             |             |             |
|---|-------------|-------------|-------------|
| C | 0.45735900  | -0.04203100 | -0.63031900 |
| C | -0.45711700 | -0.04218500 | 0.63007300  |
| C | -0.29374300 | 1.25261800  | 1.45382300  |
| C | -0.46253800 | 2.52880100  | 0.61283000  |
| C | 0.46266100  | 2.52903600  | -0.61243800 |
| C | 0.29395400  | 1.25305700  | -1.45379200 |
| H | -1.00367200 | 1.24381800  | 2.28621900  |
| H | -0.18904900 | -0.91115800 | 1.24304500  |
| H | 0.18922800  | -0.91088300 | -1.24344900 |
| H | -1.50740500 | 2.61570200  | 0.29284100  |
| H | -0.25447000 | 3.40267800  | 1.24052800  |
| H | 0.25450500  | 3.40312000  | -1.23983900 |
| H | 1.50752600  | 2.61595700  | -0.29249000 |
| H | -0.71129600 | 1.23331700  | -1.89544000 |
| H | 1.00386500  | 1.24451500  | -2.28621500 |
| H | 0.71151200  | 1.23268400  | 1.89552900  |
| C | -1.91950600 | -0.28286600 | 0.27027200  |
| C | 1.91973100  | -0.28304200 | -0.27058800 |

|    |             |             |             |
|----|-------------|-------------|-------------|
| O  | -2.85647500 | 0.38975800  | 0.56157900  |
| O  | 2.85708300  | 0.38913200  | -0.56164200 |
| Cl | -2.19998200 | -1.84929700 | -0.63859900 |
| Cl | 2.19937000  | -1.84959700 | 0.63863500  |

Cartesian coordinates for **TS35** [R/R' = C(O)Cl]

|    |             |             |             |
|----|-------------|-------------|-------------|
| C  | -0.03989900 | 0.06411900  | -0.69138700 |
| C  | 0.04101800  | 0.06409600  | 0.69172000  |
| C  | 0.10417700  | 1.32152600  | 1.50066900  |
| C  | 0.40408000  | 2.57270700  | 0.65499500  |
| C  | -0.39855200 | 2.57332200  | -0.65469000 |
| C  | -0.10071500 | 1.32163800  | -1.50038300 |
| H  | -0.07504200 | -0.89627000 | -1.19696900 |
| H  | 0.07313000  | -0.89631500 | 1.19747800  |
| H  | 0.84542200  | 1.18661600  | 2.29766900  |
| H  | 1.47570400  | 2.60661900  | 0.42923100  |
| H  | -0.16676100 | 3.46855100  | -1.24020100 |
| H  | -0.84235600 | 1.18789000  | -2.29720100 |
| H  | 0.86611300  | 1.41970500  | -2.01615100 |
| H  | -1.47012400 | 2.60888000  | -0.42889600 |
| H  | 0.17366400  | 3.46830200  | 1.24049000  |
| H  | -0.86259600 | 1.42112100  | 2.01626700  |
| C  | -2.29403500 | -0.20797700 | 0.16290500  |
| C  | 2.29232500  | -0.21232700 | -0.16297900 |
| O  | 3.12027000  | 0.56832300  | -0.44575000 |
| O  | -3.12240600 | 0.57254700  | 0.44426100  |
| Cl | -2.72926500 | -2.04862900 | -0.20599000 |
| Cl | 2.72629600  | -2.05047000 | 0.20629000  |

IRC for **TS35** [R/R' = C(O)Cl]

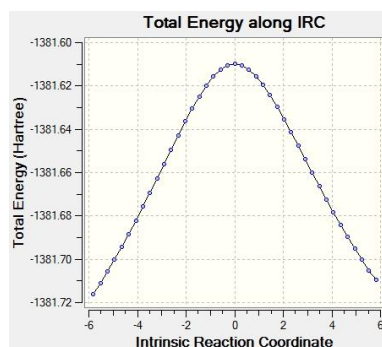

Cartesian coordinates for **S36** (R/R' = Ph)

|   |             |             |             |
|---|-------------|-------------|-------------|
| C | 0.47435700  | 0.01420300  | -0.62638200 |
| C | -0.47455700 | 0.01425000  | 0.62675300  |
| C | -0.29266400 | 1.31788000  | 1.43616900  |
| C | -0.46555800 | 2.60388700  | 0.60932300  |
| C | 0.46581300  | 2.60374400  | -0.60895100 |
| C | 0.29239800  | 1.31781600  | -1.43580000 |
| H | -0.96598000 | 1.31847100  | 2.30147800  |
| H | -0.14128500 | -0.80015800 | 1.28096800  |
| H | 0.14099200  | -0.80023300 | -1.28053700 |
| H | -1.50182100 | 2.70333800  | 0.26499900  |
| H | -0.26187400 | 3.47662000  | 1.24220500  |
| H | 0.26243500  | 3.47658900  | -1.24177700 |
| H | 1.50213400  | 2.70276400  | -0.26467100 |
| H | -0.72562300 | 1.30698200  | -1.84691300 |
| H | 0.96537300  | 1.31829500  | -2.30136800 |
| H | 0.72521200  | 1.30688400  | 1.84763500  |
| C | 1.92423200  | -0.34153800 | -0.26530900 |
| C | 3.03122500  | 0.42389500  | -0.66226300 |

|   |             |             |             |
|---|-------------|-------------|-------------|
| C | 2.18731800  | -1.53737400 | 0.42891300  |
| C | 4.33920300  | 0.02848400  | -0.36000300 |
| H | 2.88845000  | 1.34055800  | -1.22220900 |
| C | 3.48858600  | -1.93869300 | 0.73309800  |
| H | 1.36234300  | -2.17808000 | 0.72947800  |
| C | 4.57638800  | -1.15158400 | 0.34433000  |
| H | 5.17162800  | 0.64868700  | -0.68125400 |
| H | 3.65200300  | -2.86978800 | 1.26887200  |
| H | 5.59105300  | -1.45884000 | 0.58031000  |
| C | -1.92435000 | -0.34153000 | 0.26552400  |
| C | -3.03143200 | 0.42431800  | 0.66132800  |
| C | -2.18716000 | -1.53787600 | -0.42796100 |
| C | -4.33930200 | 0.02879900  | 0.35865900  |
| H | -2.88885100 | 1.34136300  | 1.22069500  |
| C | -3.48828300 | -1.93928300 | -0.73255900 |
| H | -1.36201100 | -2.17882600 | -0.72755300 |
| C | -4.57621400 | -1.15174800 | -0.34493600 |
| H | -5.17184100 | 0.64931100  | 0.67901500  |
| H | -3.65154700 | -2.87075500 | -1.26772100 |
| H | -5.59078100 | -1.45908100 | -0.58124400 |

Cartesian coordinates for **TS36** (R/R' = Ph)

|   |             |             |             |
|---|-------------|-------------|-------------|
| C | 0.00213200  | 0.08653300  | -0.68935400 |
| C | -0.00211900 | 0.08638500  | 0.68914100  |
| C | 0.00461300  | 1.34817700  | 1.50724500  |
| C | 0.34389800  | 2.60508600  | 0.68732800  |
| C | -0.34367900 | 2.60526200  | -0.68694100 |
| C | -0.00450000 | 1.34852000  | -1.50717000 |
| H | 0.00806300  | -0.86217600 | -1.21198300 |
| H | -0.00820000 | -0.86243600 | 1.21156500  |
| H | 0.71521400  | 1.22067600  | 2.33110800  |
| H | 1.42929600  | 2.66032000  | 0.55352500  |
| H | -0.05347000 | 3.49787900  | -1.25231800 |
| H | -0.71515300 | 1.22125900  | -2.33102600 |
| H | 0.98613400  | 1.43989800  | -1.97009500 |
| H | -1.42906600 | 2.66045800  | -0.55305900 |
| H | 0.05369400  | 3.49757100  | 1.25291900  |
| H | -0.98604000 | 1.43951600  | 1.97013800  |
| C | -2.19386000 | -0.27701400 | -0.00311100 |
| C | -3.26979300 | 0.59237200  | 0.20019100  |
| C | -2.45295500 | -1.63451900 | -0.19979100 |
| C | -4.58721900 | 0.11187400  | 0.19247000  |
| H | -3.10906900 | 1.65528000  | 0.37627400  |
| C | -3.76542700 | -2.12690500 | -0.20949300 |
| H | -1.63133000 | -2.33943200 | -0.34875500 |
| C | -4.83576400 | -1.24900500 | -0.01500100 |
| H | -5.41684300 | 0.79757700  | 0.35210100  |
| H | -3.95104500 | -3.18732300 | -0.36646000 |
| H | -5.85616300 | -1.62221600 | -0.01975400 |
| C | 2.19378800  | -0.27712800 | 0.00292800  |
| C | 3.26968200  | 0.59229600  | -0.20039100 |
| C | 2.45291600  | -1.63460600 | 0.19973600  |
| C | 4.58712600  | 0.11184400  | -0.19254500 |
| H | 3.10896700  | 1.65518000  | -0.37664200 |
| C | 3.76540700  | -2.12693300 | 0.20957800  |
| H | 1.63130600  | -2.33953600 | 0.34869200  |
| C | 4.83571700  | -1.24900200 | 0.01508000  |
| H | 5.41673000  | 0.79756400  | -0.35220700 |
| H | 3.95106000  | -3.18732700 | 0.36665600  |
| H | 5.85613300  | -1.62216700 | 0.01993700  |



IRC for **TS36** (R/R' = Ph)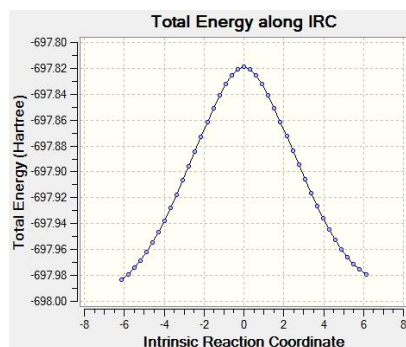Cartesian coordinates for **S37** (R/R' = CCH)

|   |             |             |             |
|---|-------------|-------------|-------------|
| C | -0.53172100 | -0.75492300 | 0.57745200  |
| C | 0.53171900  | -0.75492100 | -0.57746500 |
| C | 0.42022000  | 0.53936000  | -1.42454200 |
| C | 0.52018800  | 1.80882100  | -0.56616600 |
| C | -0.52017800 | 1.80881800  | 0.56617600  |
| C | -0.42021400 | 0.53934900  | 1.42454200  |
| H | 1.19702600  | 0.53141100  | -2.19649400 |
| H | 0.31584200  | -1.61285900 | -1.22650200 |
| H | -0.31584900 | -1.61286700 | 1.22648200  |
| H | 1.52893500  | 1.87904700  | -0.13788500 |
| H | 0.38650300  | 2.69226200  | -1.20191200 |
| H | -0.38648900 | 2.69225300  | 1.20193000  |
| H | -1.52892400 | 1.87905200  | 0.13789600  |
| H | 0.54857400  | 0.51628900  | 1.93854300  |
| H | -1.19701900 | 0.53139800  | 2.19649500  |
| H | -0.54856700 | 0.51630800  | -1.93854600 |
| C | 1.88306900  | -0.94282600 | -0.03652400 |
| C | -1.88307100 | -0.94281600 | 0.03650800  |
| C | 3.00160500  | -1.10869900 | 0.39683000  |
| C | -3.00161600 | -1.10868900 | -0.39682100 |
| H | 3.98686000  | -1.25658500 | 0.77645200  |
| H | -3.98689200 | -1.25655600 | -0.77639700 |

Cartesian coordinates for **T S37** (R/R' = CCH)

|   |             |             |             |
|---|-------------|-------------|-------------|
| C | 0.10287400  | -0.57183600 | -0.83055100 |
| C | -0.03904500 | -0.72768800 | 0.58482300  |
| C | 0.11540800  | 0.43137900  | 1.52756200  |
| C | 0.79325100  | 1.65306300  | 0.89087900  |
| C | 0.18901100  | 1.95127700  | -0.49026000 |
| C | 0.37680100  | 0.78455900  | -1.47265800 |
| H | -0.32918100 | -1.35380000 | -1.44808800 |
| H | -0.51873200 | -1.63566400 | 0.93820600  |
| H | 0.61063300  | 0.11149100  | 2.45042200  |
| H | 1.87499100  | 1.48052900  | 0.80599600  |
| H | 0.63523200  | 2.85751000  | -0.91366800 |
| H | -0.34169500 | 0.86567600  | -2.29160500 |
| H | 1.38230700  | 0.78736300  | -1.90873500 |
| H | -0.88667600 | 2.12564300  | -0.38058600 |
| H | 0.66580100  | 2.51342800  | 1.55616600  |
| H | -0.92611600 | 0.67115200  | 1.78335200  |
| C | -2.52520200 | -0.34708700 | -0.59548000 |
| C | -3.23380900 | -0.90563500 | 0.26299400  |
| C | 1.43550500  | -1.23478800 | -0.13408600 |
| C | 2.49944000  | -1.82399000 | -0.01892500 |
| H | 3.43877200  | -2.32468800 | 0.08289400  |
| H | -3.89074500 | -1.35416300 | 0.97984500  |

IRC for **TS37** (R/R' = CCH)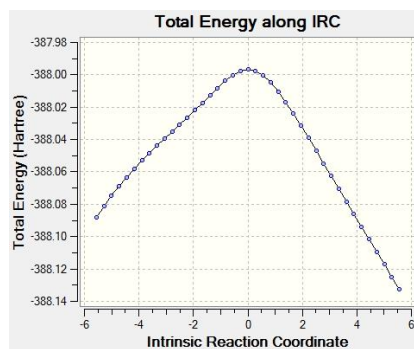Cartesian coordinates for **S38** (R/R' = CN)

|   |             |             |             |
|---|-------------|-------------|-------------|
| C | -0.53902100 | -0.77061700 | 0.56816000  |
| C | 0.53918000  | -0.77039000 | -0.56852100 |
| C | 0.45900700  | 0.52424300  | -1.41718200 |
| C | 0.53481700  | 1.79094700  | -0.55220800 |
| C | -0.53497100 | 1.79072500  | 0.55256900  |
| C | -0.45897400 | 0.52379700  | 1.41719700  |
| H | 1.25816700  | 0.51304400  | -2.16497700 |
| H | 0.36874600  | -1.63931600 | -1.21490500 |
| H | -0.36845700 | -1.63969600 | 1.21430900  |
| H | 1.53259500  | 1.86529100  | -0.09967500 |
| H | 0.41554400  | 2.67240600  | -1.19180900 |
| H | -0.41581600 | 2.67202100  | 1.19241700  |
| H | -1.53276100 | 1.86505100  | 0.10006200  |
| H | 0.49232500  | 0.49743400  | 1.96213300  |
| H | -1.25811200 | 0.51229800  | 2.16501000  |
| H | -0.49227600 | 0.49787200  | -1.96213900 |
| C | 1.87455000  | -0.94116400 | 0.02496100  |
| C | -1.87435100 | -0.94131700 | -0.02544100 |
| N | -2.92996100 | -1.07521000 | -0.49155700 |
| N | 2.92976400  | -1.07532800 | 0.49189400  |

Cartesian coordinates for **TS38** (R/R' = CN)

|   |             |             |             |
|---|-------------|-------------|-------------|
| C | 0.01610600  | -0.73079600 | 0.70408700  |
| C | -0.01688700 | -0.72989500 | -0.70574000 |
| C | -0.08731700 | 0.53336000  | -1.51164600 |
| C | -0.39084700 | 1.77907200  | -0.66038400 |
| C | 0.39264200  | 1.77777000  | 0.66221200  |
| C | 0.08781800  | 0.53122200  | 1.51173700  |
| H | 0.02277300  | -1.69054300 | 1.20896100  |
| H | -0.02464900 | -1.68894200 | -1.21184200 |
| H | -0.84301200 | 0.38588200  | -2.29083100 |
| H | -1.46599700 | 1.81474400  | -0.45371800 |
| H | 0.14952000  | 2.67264000  | 1.24331200  |
| H | 0.84329000  | 0.38190300  | 2.29079200  |
| H | -0.87168300 | 0.62524100  | 2.03474300  |
| H | 1.46782600  | 1.81265100  | 0.45559800  |
| H | -0.14682700 | 2.67449100  | -1.24026200 |
| H | 0.87224800  | 0.62716800  | -2.03456200 |
| C | 2.05629800  | -0.90781300 | -0.07738000 |
| N | 3.20686100  | -1.12165100 | -0.11131900 |
| C | -2.05744200 | -0.90583400 | 0.07526900  |
| N | -3.20767900 | -1.12088400 | 0.11258700  |

IRC for **TS38** (R/R' = CN)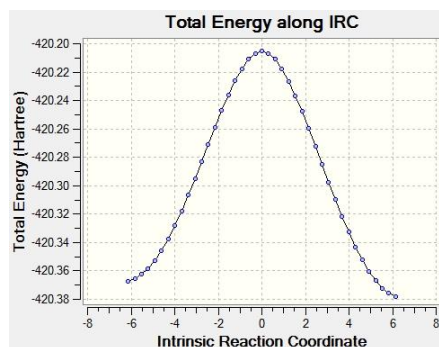Cartesian coordinates for **S39** (R = CH<sub>3</sub> & R' = NH<sub>2</sub>)

|   |             |             |             |
|---|-------------|-------------|-------------|
| C | 0.26977400  | 1.13081400  | 0.27754900  |
| C | -1.02218900 | 0.50163700  | -0.32435100 |
| C | -0.70057300 | -0.79831500 | -1.09666500 |
| C | 0.09573600  | -1.81382000 | -0.25887900 |
| C | 1.37605300  | -1.18351200 | 0.31241300  |
| C | 1.06631600  | 0.09991800  | 1.10218200  |
| H | -1.63274100 | -1.25051300 | -1.45912100 |
| H | -1.42085500 | 1.22929000  | -1.04728700 |
| H | -0.03712500 | 1.93979100  | 0.95412600  |
| H | -0.52537100 | -2.18421300 | 0.56799600  |
| H | 0.34236900  | -2.68931300 | -0.87235900 |
| H | 1.89749400  | -1.89973000 | 0.95921400  |
| H | 2.07235600  | -0.96007800 | -0.50913400 |
| H | 0.48664200  | -0.16549300 | 1.99587600  |
| H | 1.99126800  | 0.57237400  | 1.44996600  |
| H | -0.11840100 | -0.54936300 | -1.99559700 |
| C | -2.11304000 | 0.28961600  | 0.74069700  |
| H | -1.82158900 | -0.44411600 | 1.49910800  |
| H | -2.33971300 | 1.22777000  | 1.26071300  |
| H | -3.04117200 | -0.06695600 | 0.27939200  |
| N | 1.16235600  | 1.75937800  | -0.71119500 |
| H | 1.50617400  | 1.08523400  | -1.38950100 |
| H | 0.67170800  | 2.48164700  | -1.23270700 |

Cartesian coordinates for **TS39** (R = CH<sub>3</sub> & R' = NH<sub>2</sub>)

|   |             |             |             |
|---|-------------|-------------|-------------|
| C | 0.86850200  | 0.09677200  | -0.69726600 |
| C | 0.81915900  | 0.32947800  | 0.68135300  |
| C | -0.44233700 | 0.13657800  | 1.49282100  |
| C | -1.69455600 | 0.01087000  | 0.61032700  |
| C | -1.45129500 | -0.94106200 | -0.56998600 |
| C | -0.31241100 | -0.43719300 | -1.47318100 |
| H | 1.77488100  | 0.33761700  | -1.23650600 |
| H | 1.69339300  | 0.73936000  | 1.17061700  |
| H | -0.53161400 | 0.98996600  | 2.16932900  |
| H | -1.95852600 | 1.00370700  | 0.23058800  |
| H | -2.36300400 | -1.05292000 | -1.16751700 |
| H | 0.02300100  | -1.23036700 | -2.15392900 |
| H | -0.66202300 | 0.38610600  | -2.10162900 |
| H | -1.20885400 | -1.94116500 | -0.18497100 |
| H | -2.53648900 | -0.34208800 | 1.21694300  |
| H | -0.33919900 | -0.75704500 | 2.12471200  |
| C | 1.67855900  | -1.53207000 | 0.33608300  |
| H | 2.74579900  | -1.38014600 | 0.17833800  |
| H | 1.47280000  | -1.83498000 | 1.36282100  |
| H | 1.26451000  | -2.26540900 | -0.35635200 |
| N | 0.42138300  | 2.23938400  | -0.36963600 |
| H | 1.25712900  | 2.82890200  | -0.40918500 |

H -0.37521000 2.86254100 -0.53671500

IRC for **TS39** (R = CH<sub>3</sub> & R' = NH<sub>2</sub>)

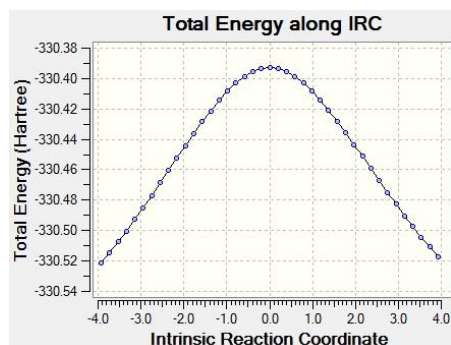

Cartesian coordinates for **S40** (R = CH<sub>3</sub> & R' = OH)

|   |             |             |             |
|---|-------------|-------------|-------------|
| C | -0.07318300 | -1.17137800 | 0.23078300  |
| C | 1.09238200  | -0.32628600 | -0.33688500 |
| C | 0.55714700  | 0.93014600  | -1.06368300 |
| C | -0.40117300 | 1.76589300  | -0.19723200 |
| C | -1.56242900 | 0.90940500  | 0.33246600  |
| C | -1.04751700 | -0.33448400 | 1.07809200  |
| H | 1.40102500  | 1.54439000  | -1.40242900 |
| H | 1.59432800  | -0.96112600 | -1.07862400 |
| H | 0.34129600  | -1.97478900 | 0.84985400  |
| H | 0.14524900  | 2.19891100  | 0.65122400  |
| H | -0.78644000 | 2.61236400  | -0.77873600 |
| H | -2.20613400 | 1.50039300  | 0.99476900  |
| H | -2.20323700 | 0.60336900  | -0.50845100 |
| H | -0.53441400 | -0.01723400 | 1.99589600  |
| H | -1.88075800 | -0.97567700 | 1.38724900  |
| H | 0.02969200  | 0.62239200  | -1.97919200 |
| C | 2.12869700  | 0.02210300  | 0.74567600  |
| H | 1.71798600  | 0.66225100  | 1.53322300  |
| H | 2.51287900  | -0.88534600 | 1.22569000  |
| H | 2.98164500  | 0.55055600  | 0.30536900  |
| O | -0.76262400 | -1.87690300 | -0.81515100 |
| H | -1.17566900 | -1.23762400 | -1.40993700 |

Cartesian coordinates for **TS40** (R = CH<sub>3</sub> & R' = OH)

|   |             |             |             |
|---|-------------|-------------|-------------|
| C | -0.73969400 | -0.46552000 | -0.73555700 |
| C | -0.63146700 | -0.71599400 | 0.62579800  |
| C | 0.36051500  | 0.00815300  | 1.50570900  |
| C | 1.47339500  | 0.68071800  | 0.68532900  |
| C | 0.89918800  | 1.47345400  | -0.49820300 |
| C | 0.08966600  | 0.56943400  | -1.44612300 |
| H | -1.37225100 | -1.11119400 | -1.33173200 |
| H | -1.18873100 | -1.54691800 | 1.04054600  |
| H | 0.78741900  | -0.73275300 | 2.18690300  |
| H | 2.12888200  | -0.10971400 | 0.30892100  |
| H | 1.70756000  | 1.94750000  | -1.06571800 |
| H | -0.54711200 | 1.16386200  | -2.11419300 |
| H | 0.76574600  | -0.01303900 | -2.07964300 |
| H | 0.26804000  | 2.29183900  | -0.12481500 |
| H | 2.05899400  | 1.34114100  | 1.33512900  |
| H | -0.16772000 | 0.74401600  | 2.12906300  |
| C | -2.19597300 | 0.56488500  | 0.30407200  |
| H | -2.97513200 | 0.31186400  | -0.41413100 |
| H | -2.54409900 | 0.35342600  | 1.31523600  |
| H | -1.85452800 | 1.59293700  | 0.21318200  |
| O | 0.85313300  | -2.00012800 | -0.43829400 |

H 0.57408800 -2.92271900 -0.53854700

IRC for **TS40** (R = CH<sub>3</sub> & R' = OH)

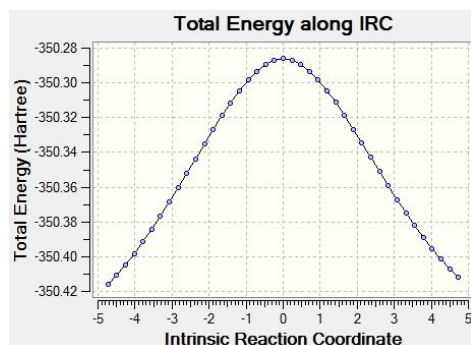

Cartesian coordinates for **S41** (R = CH<sub>3</sub> & R' = F)

|   |             |             |             |
|---|-------------|-------------|-------------|
| C | 0.02503000  | -1.16298300 | 0.21260300  |
| C | 1.11497300  | -0.23253900 | -0.33577600 |
| C | 0.48574000  | 0.99294100  | -1.03584300 |
| C | -0.54894300 | 1.72029100  | -0.15953800 |
| C | -1.64363700 | 0.75359000  | 0.31974800  |
| C | -1.04117100 | -0.45934200 | 1.04770600  |
| H | 1.28146300  | 1.68327700  | -1.34307700 |
| H | 1.66065500  | -0.81496700 | -1.08975100 |
| H | 0.47477700  | -1.99220800 | 0.77187800  |
| H | -0.05535400 | 2.17626000  | 0.70998900  |
| H | -0.99638300 | 2.54608600  | -0.72572600 |
| H | -2.34920100 | 1.26893700  | 0.98223100  |
| H | -2.22060500 | 0.40105100  | -0.54431000 |
| H | -0.57888800 | -0.13976500 | 1.99172500  |
| H | -1.81861500 | -1.18616900 | 1.30897400  |
| H | -0.00762100 | 0.65278000  | -1.95467300 |
| F | -0.62661300 | -1.77207700 | -0.89950800 |
| C | 2.12146100  | 0.15361200  | 0.76240600  |
| H | 1.66681900  | 0.75178800  | 1.55859600  |
| H | 2.56295700  | -0.73575200 | 1.22706800  |
| H | 2.93879400  | 0.74396500  | 0.33481200  |

Cartesian coordinates for **TS41** (R = CH<sub>3</sub> & R' = F)

|   |             |             |             |
|---|-------------|-------------|-------------|
| C | -0.82705800 | -0.25300200 | -0.74469600 |
| C | -0.75903700 | -0.60743600 | 0.59287700  |
| C | 0.36820800  | -0.15809500 | 1.49261600  |
| C | 1.58244700  | 0.33943500  | 0.69050500  |
| C | 1.16415800  | 1.30345500  | -0.42899200 |
| C | 0.18862200  | 0.63069600  | -1.41042600 |
| H | -1.54238200 | -0.77239700 | -1.37072900 |
| H | -1.42612000 | -1.38710600 | 0.93987200  |
| H | 0.64613000  | -1.02335300 | 2.10062200  |
| H | 2.06522600  | -0.53713500 | 0.24949200  |
| H | 2.04383200  | 1.64678600  | -0.98405500 |
| H | -0.30942800 | 1.36598300  | -2.05506300 |
| H | 0.72922100  | -0.05933200 | -2.06790000 |
| H | 0.70730000  | 2.20457800  | 0.00406500  |
| H | 2.29294000  | 0.82807600  | 1.36665400  |
| H | 0.00912600  | 0.61362600  | 2.18803000  |
| C | -2.01489700 | 0.88660300  | 0.36928600  |
| F | 0.36759000  | -2.11982100 | -0.56804600 |
| H | -2.83006500 | 0.84263200  | -0.35169800 |
| H | -2.41092100 | 0.66401300  | 1.36029300  |
| H | -1.49782200 | 1.84208800  | 0.36581300  |

IRC for **TS41** (R = CH<sub>3</sub> & R' = F)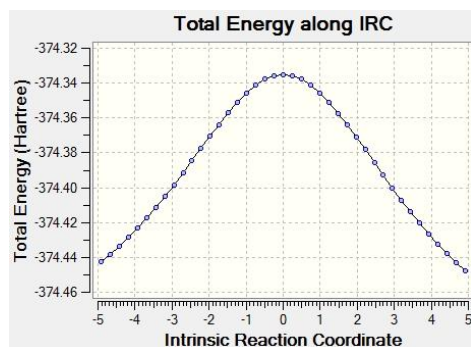Cartesian coordinates for **S42** (R = NH<sub>2</sub> & R' = OH)

|   |             |             |             |
|---|-------------|-------------|-------------|
| C | 0.06131700  | -1.16996400 | 0.24068700  |
| C | 1.14431300  | -0.19834300 | -0.30233900 |
| C | 0.49941700  | 0.98484500  | -1.04980600 |
| C | -0.56365800 | 1.71450800  | -0.21000900 |
| C | -1.64106000 | 0.73981100  | 0.29354600  |
| C | -1.01743100 | -0.44039800 | 1.05938000  |
| H | 1.29194100  | 1.67293000  | -1.36174300 |
| H | 1.75003100  | -0.77016200 | -1.01509700 |
| H | 0.55365400  | -1.91729000 | 0.87369800  |
| H | -0.08827800 | 2.21038800  | 0.64842800  |
| H | -1.02091300 | 2.51521100  | -0.80352100 |
| H | -2.36316400 | 1.25939800  | 0.93432700  |
| H | -2.22077800 | 0.36547100  | -0.56405000 |
| H | -0.56493800 | -0.06651800 | 1.98852700  |
| H | -1.78425600 | -1.16489700 | 1.35567000  |
| H | 0.02966000  | 0.61001100  | -1.97045900 |
| N | 2.07043700  | 0.30191300  | 0.72378800  |
| H | 1.59034100  | 0.81229500  | 1.45918700  |
| H | 2.57689700  | -0.46161700 | 1.16426600  |
| O | -0.51359700 | -1.94872100 | -0.82095800 |
| H | -1.03186700 | -1.37159500 | -1.39683800 |

Cartesian coordinates for **TS42** (R = NH<sub>2</sub> & R' = OH)

|   |             |             |             |
|---|-------------|-------------|-------------|
| C | -0.96642100 | -0.09730600 | -0.68916400 |
| C | -0.92449400 | -0.18238700 | 0.75714400  |
| C | 0.34597800  | 0.11039400  | 1.53830000  |
| C | 1.58835700  | 0.20743200  | 0.63637500  |
| C | 1.31311300  | 1.02057100  | -0.63663100 |
| C | 0.23457800  | 0.33149600  | -1.49082200 |
| H | -1.73608400 | -0.66338600 | -1.19727300 |
| H | -1.65172400 | -0.83713900 | 1.22144600  |
| H | 0.47632500  | -0.70997200 | 2.24717700  |
| H | 1.84232700  | -0.81683300 | 0.34375000  |
| H | 2.22685400  | 1.11364600  | -1.23358500 |
| H | -0.07663600 | 0.95217100  | -2.34092100 |
| H | 0.62302100  | -0.62402900 | -1.85977400 |
| H | 1.02079300  | 2.05478400  | -0.38346500 |
| H | 2.41829600  | 0.64497800  | 1.20335000  |
| H | 0.20206000  | 1.03013900  | 2.12620100  |
| N | -1.64620000 | 1.08751000  | 0.16959600  |
| O | 0.06564500  | -2.25218500 | -0.26687100 |
| H | -0.06572000 | -3.20716200 | -0.32245700 |
| H | -2.65743400 | 1.14384000  | 0.21818600  |
| H | -1.17051400 | 1.98266800  | 0.23395900  |

IRC for **TS42** (R = NH<sub>2</sub> & R' = OH)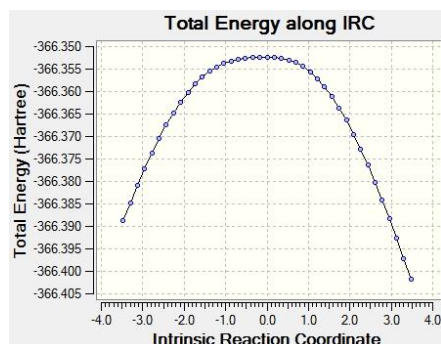Cartesian coordinates for **S43** (R = NH<sub>2</sub> & R' = F)

|   |             |             |             |
|---|-------------|-------------|-------------|
| C | -0.13823400 | 1.15582800  | 0.22411100  |
| C | -1.15736200 | 0.12312900  | -0.30074600 |
| C | -0.43875200 | -1.02659000 | -1.02848400 |
| C | 0.67646500  | -1.66320700 | -0.18045100 |
| C | 1.69346700  | -0.60735500 | 0.28343400  |
| C | 1.00325000  | 0.54479700  | 1.03134100  |
| H | -1.18505400 | -1.77388100 | -1.31755400 |
| H | -1.79945200 | 0.64496600  | -1.02006000 |
| H | -0.65456600 | 1.93518500  | 0.79838000  |
| H | 0.24590300  | -2.17251900 | 0.69450800  |
| H | 1.18155200  | -2.44338300 | -0.76208300 |
| H | 2.45506400  | -1.06166900 | 0.92816200  |
| H | 2.21954900  | -0.20198000 | -0.58979000 |
| H | 0.58960000  | 0.18100300  | 1.98245700  |
| H | 1.71791700  | 1.33559000  | 1.28567100  |
| H | 0.00230000  | -0.62731700 | -1.94969200 |
| F | 0.42231500  | 1.82107400  | -0.90290800 |
| N | -2.04155300 | -0.40161700 | 0.74792300  |
| H | -1.53062900 | -0.88961100 | 1.47729300  |
| H | -2.58514500 | 0.33565900  | 1.18817400  |

Cartesian coordinates for **TS43** (R = NH<sub>2</sub> & R' = F)

|   |             |             |             |
|---|-------------|-------------|-------------|
| C | 0.96247800  | -0.13841600 | -0.67556500 |
| C | 0.92370700  | 0.22054800  | 0.72184100  |
| C | -0.37553100 | 0.24018500  | 1.50825000  |
| C | -1.61716400 | 0.14695900  | 0.60470700  |
| C | -1.44834600 | -0.91352300 | -0.49224600 |
| C | -0.27971000 | -0.54874700 | -1.42364000 |
| H | 1.79700200  | 0.23198800  | -1.25779000 |
| H | 1.73075100  | 0.84796500  | 1.08031900  |
| H | -0.39521500 | 1.18299300  | 2.05947400  |
| H | -1.74202800 | 1.12429000  | 0.12920500  |
| H | -2.36306000 | -0.99441300 | -1.08930700 |
| H | -0.04961400 | -1.35813900 | -2.12799100 |
| H | -0.53503600 | 0.35086500  | -1.99185900 |
| H | -1.30033600 | -1.91166500 | -0.04488200 |
| H | -2.49921200 | -0.07058300 | 1.21786700  |
| H | -0.36136200 | -0.56917600 | 2.25342200  |
| F | 0.32361900  | 2.12368400  | -0.60790100 |
| N | 1.48891100  | -1.22368600 | 0.38837800  |
| H | 2.48550400  | -1.39481700 | 0.47024200  |
| H | 0.90505400  | -2.02870000 | 0.59368700  |



IRC for **TS43** (R = NH<sub>2</sub> & R' = F)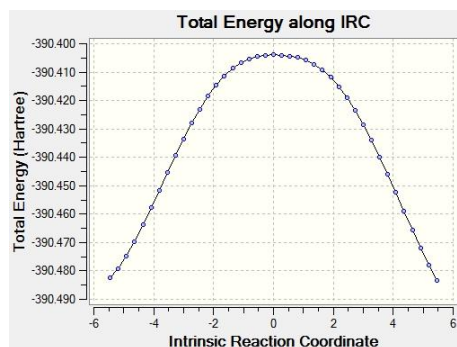Cartesian coordinates for **S44** (R = OH & R' = F)

|   |             |             |             |
|---|-------------|-------------|-------------|
| C | 0.04555600  | -1.17012500 | 0.24305600  |
| C | 1.15678800  | -0.22822100 | -0.25212500 |
| C | 0.57889000  | 0.97498700  | -1.00902000 |
| C | -0.51050000 | 1.70866800  | -0.20628200 |
| C | -1.62864800 | 0.74507000  | 0.22304800  |
| C | -1.06632600 | -0.45558300 | 1.00336900  |
| H | 1.39885400  | 1.65134600  | -1.27647900 |
| H | 1.81612400  | -0.80140300 | -0.91102100 |
| H | 0.48650900  | -1.97472500 | 0.83953100  |
| H | -0.07520500 | 2.18823800  | 0.68483300  |
| H | -0.92116200 | 2.52765700  | -0.80774400 |
| H | -2.37308100 | 1.26882300  | 0.83377600  |
| H | -2.15170000 | 0.37919700  | -0.66910600 |
| H | -0.65533100 | -0.12224500 | 1.96694400  |
| H | -1.85570100 | -1.17843900 | 1.23733800  |
| H | 0.14443600  | 0.60653000  | -1.94637000 |
| F | -0.52171500 | -1.78810200 | -0.90474600 |
| O | 1.98385000  | 0.15368000  | 0.85456600  |
| H | 1.55632400  | 0.86971900  | 1.34220700  |

Cartesian coordinates for **TS44** (R = OH & R' = F)

|   |             |             |             |
|---|-------------|-------------|-------------|
| C | -0.90270000 | -0.37427800 | 0.60770600  |
| C | -0.90365900 | 0.36054000  | -0.60889200 |
| C | 0.36326600  | 0.77058100  | -1.30115900 |
| C | 1.61430700  | 0.58007300  | -0.42565200 |
| C | 1.58153300  | -0.75763500 | 0.32793900  |
| C | 0.36088600  | -0.83879100 | 1.25992900  |
| H | -1.84009300 | -0.50101800 | 1.13482300  |
| H | -1.84439900 | 0.76035200  | -0.96560600 |
| H | 0.25115600  | 1.81963200  | -1.59216500 |
| H | 1.65823500  | 1.40176200  | 0.29589100  |
| H | 2.49331100  | -0.88046600 | 0.92241600  |
| H | 0.21094800  | -1.85535900 | 1.64021500  |
| H | 0.49128900  | -0.17984300 | 2.12647200  |
| H | 1.54840000  | -1.58898100 | -0.38614000 |
| H | 2.50814800  | 0.63982700  | -1.05619600 |
| H | 0.43309600  | 0.18344000  | -2.22537000 |
| F | -0.87292100 | 1.64218600  | 1.00197000  |
| O | -1.08752700 | -1.42661800 | -0.88501300 |
| H | -2.03538500 | -1.60902500 | -0.99119000 |



IRC for **TS44** (R = OH & R' = F)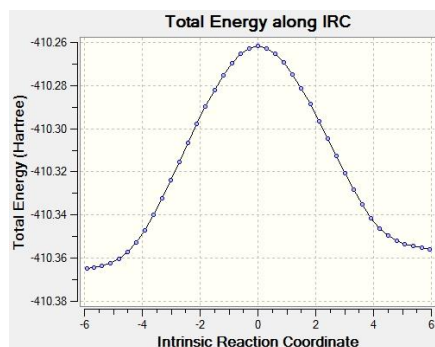Cartesian coordinates for **S45** (R = CH<sub>3</sub> & R' = C(O)CH<sub>3</sub>)

|   |             |             |             |
|---|-------------|-------------|-------------|
| C | 0.46287200  | 0.25608500  | 0.66042500  |
| C | -0.38517700 | 1.15576700  | -0.30306500 |
| C | -1.22353300 | 0.29265300  | -1.27187600 |
| C | -2.10310900 | -0.74023200 | -0.54985900 |
| C | -1.25100300 | -1.65917800 | 0.33713900  |
| C | -0.38478200 | -0.85532500 | 1.32149100  |
| H | -1.83943300 | 0.95399000  | -1.89492300 |
| H | 0.30995700  | 1.75192500  | -0.91076300 |
| H | 0.84761600  | 0.91550700  | 1.45226200  |
| H | -2.86076900 | -0.22809400 | 0.05964400  |
| H | -2.65443000 | -1.33420000 | -1.28896100 |
| H | -1.89569200 | -2.34555700 | 0.90046200  |
| H | -0.59978500 | -2.27233100 | -0.29379200 |
| H | -1.03580200 | -0.38229100 | 2.06893900  |
| H | 0.27765100  | -1.53261900 | 1.87282100  |
| H | -0.54722100 | -0.23891700 | -1.95396600 |
| C | -1.24463300 | 2.15661000  | 0.48981800  |
| H | -1.95033300 | 1.65766500  | 1.16088300  |
| H | -0.61578000 | 2.81416000  | 1.10079600  |
| H | -1.82600000 | 2.78855800  | -0.19099000 |
| C | 1.69735000  | -0.27549000 | -0.06959300 |
| O | 1.75696700  | -1.39922300 | -0.54295200 |
| C | 2.89021900  | 0.66466300  | -0.15875300 |
| H | 3.56943400  | 0.33464800  | -0.94685400 |
| H | 2.58981700  | 1.70378200  | -0.32553900 |
| H | 3.42581000  | 0.63423300  | 0.79924000  |

Cartesian coordinates for **TS45** (R = CH<sub>3</sub> & R' = C(O)CH<sub>3</sub>)

|   |             |             |             |
|---|-------------|-------------|-------------|
| C | 0.41809700  | 0.61766100  | -0.86021200 |
| C | 0.35864200  | 0.97569300  | 0.45811600  |
| C | 0.71377000  | 0.03988200  | 1.58202200  |
| C | 0.84701200  | -1.42538200 | 1.12790100  |
| C | 1.56983600  | -1.54113700 | -0.22252600 |
| C | 0.83625300  | -0.74570400 | -1.31463600 |
| H | 0.09380100  | 1.33199800  | -1.60876500 |
| H | 0.00248600  | 1.96776000  | 0.71327500  |
| H | -0.04864500 | 0.13153700  | 2.36522100  |
| H | -0.15234600 | -1.86283200 | 1.03304800  |
| H | 1.64081300  | -2.59246600 | -0.52214900 |
| H | 1.44474000  | -0.66079100 | -2.22271300 |
| H | -0.08823400 | -1.26986300 | -1.60270200 |
| H | 2.59704800  | -1.16883900 | -0.12454500 |
| H | 1.37862300  | -1.99926700 | 1.89526100  |
| H | 1.65078900  | 0.39275900  | 2.03480100  |
| C | 2.45289000  | 1.84628600  | -0.36978600 |
| H | 2.24044500  | 2.65255700  | -1.06906400 |
| H | 2.68768900  | 2.18843200  | 0.63677200  |

|   |             |             |             |
|---|-------------|-------------|-------------|
| H | 3.13228700  | 1.08477200  | -0.74666600 |
| C | -2.04674500 | 0.02403900  | -0.17981400 |
| O | -2.30591100 | -1.05840500 | -0.65116000 |
| C | -3.14221200 | 0.97596200  | 0.30287900  |
| H | -4.14368100 | 0.55550300  | 0.13852100  |
| H | -2.99131700 | 1.18037900  | 1.36911700  |
| H | -3.04246900 | 1.93180000  | -0.22379600 |

IRC for **TS45** (R = CH<sub>3</sub> & R' = C(O)CH<sub>3</sub>)

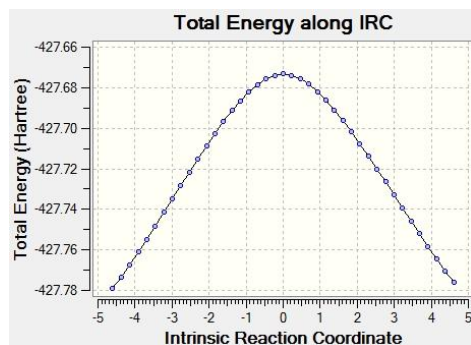

Cartesian coordinates for **S46** (R = NH<sub>2</sub> & R' = C(O)CH<sub>3</sub>)

|   |             |             |             |
|---|-------------|-------------|-------------|
| C | 0.46722400  | 0.25505700  | 0.66829700  |
| C | -0.37708200 | 1.18375600  | -0.28539200 |
| C | -1.20443400 | 0.34339700  | -1.27448400 |
| C | -2.10725900 | -0.68203400 | -0.56968700 |
| C | -1.28400100 | -1.61952300 | 0.32564700  |
| C | -0.40939900 | -0.83738200 | 1.32073100  |
| H | -1.79765300 | 1.02742900  | -1.89064500 |
| H | 0.31727900  | 1.80597000  | -0.86346300 |
| H | 0.86149200  | 0.91013200  | 1.45904600  |
| H | -2.87143000 | -0.16235600 | 0.02696600  |
| H | -2.65756800 | -1.26253600 | -1.31969300 |
| H | -1.94853700 | -2.29334100 | 0.88085400  |
| H | -0.63882200 | -2.24471500 | -0.29937400 |
| H | -1.05642100 | -0.34953600 | 2.06372700  |
| H | 0.23029400  | -1.52927700 | 1.88029100  |
| H | -0.51865700 | -0.19131400 | -1.94350500 |
| N | -1.25105600 | 2.12341100  | 0.42607500  |
| H | -1.92826200 | 1.64340300  | 1.01164000  |
| H | -0.71665200 | 2.74536700  | 1.02682400  |
| C | 1.69031700  | -0.29552700 | -0.06415500 |
| C | 2.89807700  | 0.62483000  | -0.15421100 |
| O | 1.72813500  | -1.41782800 | -0.54388400 |
| H | 3.58310400  | 0.26804600  | -0.92530600 |
| H | 2.61390400  | 1.66368300  | -0.35111000 |
| H | 3.41958200  | 0.61234100  | 0.81182500  |

Cartesian coordinates for **TS46** (R = NH<sub>2</sub> & R' = C(O)CH<sub>3</sub>)

|   |             |             |             |
|---|-------------|-------------|-------------|
| C | -0.09025800 | 0.65222700  | -0.66089500 |
| C | -0.11030400 | 0.56892500  | 0.74023400  |
| C | 0.71209100  | -0.43542200 | 1.50916000  |
| C | 1.45271600  | -1.45610700 | 0.62253800  |
| C | 1.95979100  | -0.81733600 | -0.67798500 |
| C | 0.78823300  | -0.24976600 | -1.49394000 |
| H | -0.59026200 | 1.49109900  | -1.13596300 |
| H | -0.63502700 | 1.33712300  | 1.30087500  |
| H | 0.07886600  | -0.95017100 | 2.24330400  |
| H | 0.77771700  | -2.28373100 | 0.37721500  |
| H | 2.49817200  | -1.56009000 | -1.27781500 |
| H | 1.14821500  | 0.32833000  | -2.34886600 |

|   |             |             |             |
|---|-------------|-------------|-------------|
| H | 0.18544100  | -1.07763800 | -1.89299400 |
| H | 2.65343500  | -0.00092700 | -0.45040000 |
| H | 2.28642700  | -1.88207100 | 1.19207800  |
| H | 1.42986000  | 0.16086200  | 2.08112200  |
| N | 1.37704000  | 2.36122500  | 0.14327800  |
| H | 0.77636800  | 3.19692000  | 0.13436300  |
| H | 2.32413100  | 2.76170800  | 0.19863300  |
| C | -1.68295900 | -0.28800600 | -0.06856900 |
| C | -2.90191500 | 0.60147700  | 0.00334500  |
| O | -1.70950900 | -1.48881700 | -0.16631900 |
| H | -3.48852500 | 0.32515800  | 0.88672400  |
| H | -2.64854800 | 1.66150200  | 0.05565800  |
| H | -3.52384300 | 0.41793400  | -0.87966300 |

IRC for **TS46** (R = NH<sub>2</sub> & R' = C(O)CH<sub>3</sub>)

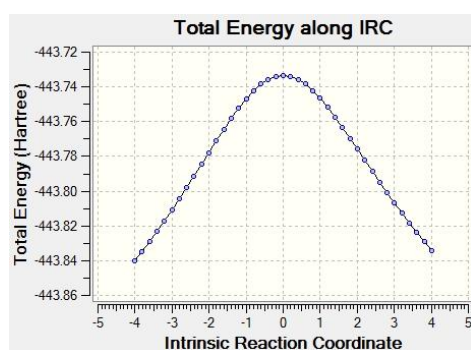

Cartesian coordinates for **S47** (R = OH & R' = C(O)CH<sub>3</sub>)

|   |             |             |             |
|---|-------------|-------------|-------------|
| C | 0.46609900  | 0.23082600  | 0.68126200  |
| C | -0.35806100 | 1.19489500  | -0.23067800 |
| C | -1.21136400 | 0.42988800  | -1.25279900 |
| C | -2.12185900 | -0.61822600 | -0.59183800 |
| C | -1.30378300 | -1.60639900 | 0.25218800  |
| C | -0.42121100 | -0.88131600 | 1.28334300  |
| H | -1.79792100 | 1.15636600  | -1.82664000 |
| H | 0.32576900  | 1.86467200  | -0.76163000 |
| H | 0.85083300  | 0.86443900  | 1.49162900  |
| H | -2.87722600 | -0.12121800 | 0.03722400  |
| H | -2.68884200 | -1.15210600 | -1.36320000 |
| H | -1.97239500 | -2.30282900 | 0.77296500  |
| H | -0.66444200 | -2.20352600 | -0.40553800 |
| H | -1.06146100 | -0.42386600 | 2.05145100  |
| H | 0.21271500  | -1.60499400 | 1.80723200  |
| H | -0.54090800 | -0.07608400 | -1.95964500 |
| O | -1.14613200 | 2.08573200  | 0.56811100  |
| H | -1.87907600 | 1.59434900  | 0.96178000  |
| C | 1.69213400  | -0.29958600 | -0.06502200 |
| C | 2.88276000  | 0.63928300  | -0.17208600 |
| O | 1.74360300  | -1.42664700 | -0.53123300 |
| H | 3.54926100  | 0.30708600  | -0.97003300 |
| H | 2.58258800  | 1.67907800  | -0.33422900 |
| H | 3.43304300  | 0.60976300  | 0.77739900  |

Cartesian coordinates for **TS47** (R = OH & R' = C(O)CH<sub>3</sub>)

|   |             |             |             |
|---|-------------|-------------|-------------|
| C | 0.06601000  | 0.71845200  | -0.74678400 |
| C | 0.00168100  | 0.78908500  | 0.63922300  |
| C | 0.70178500  | -0.18893700 | 1.54382600  |
| C | 1.31481700  | -1.38956000 | 0.79819200  |
| C | 1.92506800  | -0.97029200 | -0.54750400 |
| C | 0.85828000  | -0.34061800 | -1.45756500 |
| H | -0.44243600 | 1.47964700  | -1.33034600 |

|   |             |             |             |
|---|-------------|-------------|-------------|
| H | -0.55190100 | 1.60418600  | 1.09362300  |
| H | 0.01119000  | -0.52800000 | 2.32722900  |
| H | 0.54018900  | -2.14541600 | 0.62454500  |
| H | 2.36360700  | -1.84065100 | -1.04873400 |
| H | 1.31492700  | 0.11489500  | -2.34143200 |
| H | 0.16451600  | -1.11459900 | -1.81720900 |
| H | 2.71597200  | -0.23159300 | -0.38620900 |
| H | 2.07613800  | -1.85299900 | 1.43531300  |
| H | 1.48311300  | 0.39271500  | 2.04430900  |
| O | 1.69079000  | 1.98578400  | -0.01339600 |
| H | 1.43445200  | 2.91629100  | -0.11224000 |
| C | -1.81924500 | -0.25403600 | -0.10300000 |
| C | -3.00732300 | 0.66246000  | 0.08661300  |
| O | -1.87437400 | -1.43813800 | -0.26552300 |
| H | -3.13211800 | 0.84394800  | 1.16117700  |
| H | -2.83934500 | 1.62957300  | -0.39483600 |
| H | -3.91606200 | 0.19150200  | -0.30185100 |

IRC for **TS47** (R = OH & R' = C(O)CH<sub>3</sub>)

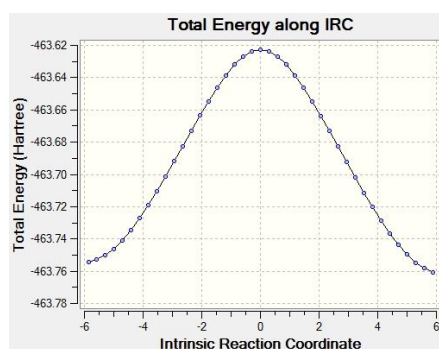

Cartesian coordinates for **S48** (R = F & R' = C(O)CH<sub>3</sub>)

|   |             |             |             |
|---|-------------|-------------|-------------|
| C | 0.46912800  | 0.22226600  | 0.67074300  |
| C | -0.33780700 | 1.17689500  | -0.23823900 |
| C | -1.24569600 | 0.46567500  | -1.23352700 |
| C | -2.15987600 | -0.56397000 | -0.55279000 |
| C | -1.33797100 | -1.57956200 | 0.25338700  |
| C | -0.42575700 | -0.88186100 | 1.27682300  |
| H | -1.82925700 | 1.22142500  | -1.77131500 |
| H | 0.32523100  | 1.88261900  | -0.75138400 |
| H | 0.86177700  | 0.85408300  | 1.47912300  |
| H | -2.86131100 | -0.03991200 | 0.10846000  |
| H | -2.76233400 | -1.07676800 | -1.31147300 |
| H | -2.00733900 | -2.26936000 | 0.78161400  |
| H | -0.72516600 | -2.18157900 | -0.42555900 |
| H | -1.04616300 | -0.41260400 | 2.05031000  |
| H | 0.20840800  | -1.61958500 | 1.78060900  |
| H | -0.60671800 | -0.03523100 | -1.97338400 |
| F | -1.14482600 | 1.98018700  | 0.61235500  |
| C | 1.69315000  | -0.31195400 | -0.08570400 |
| C | 2.90608700  | 0.60058700  | -0.14823600 |
| H | 3.59133500  | 0.25857000  | -0.92566000 |
| H | 2.63002000  | 1.64640600  | -0.31780000 |
| H | 3.42307500  | 0.56060300  | 0.81933700  |
| O | 1.71679100  | -1.42235100 | -0.58860100 |

Cartesian coordinates for **TS48** (R = F & R' = C(O)CH<sub>3</sub>)

|   |             |             |             |
|---|-------------|-------------|-------------|
| C | -0.00686800 | 0.69638100  | -0.72545500 |
| C | -0.06534700 | 0.72367500  | 0.65817200  |
| C | 0.71503600  | -0.21564400 | 1.53031200  |
| C | 1.41340500  | -1.34757000 | 0.75513200  |

|   |             |             |             |
|---|-------------|-------------|-------------|
| C | 1.97881300  | -0.84549200 | -0.58123300 |
| C | 0.86151000  | -0.27466900 | -1.46991200 |
| H | -0.52314700 | 1.47791200  | -1.27430900 |
| H | -0.62149500 | 1.52694900  | 1.13072900  |
| H | 0.07271900  | -0.61465000 | 2.32608400  |
| H | 0.69993700  | -2.15930200 | 0.57034400  |
| H | 2.48454900  | -1.66182200 | -1.10873800 |
| H | 1.27723100  | 0.25360100  | -2.33355200 |
| H | 0.23409700  | -1.08626500 | -1.86575500 |
| H | 2.70533000  | -0.04822400 | -0.39850700 |
| H | 2.21388200  | -1.76319800 | 1.37672300  |
| H | 1.45317100  | 0.43101100  | 2.01984600  |
| F | 1.46073400  | 2.12451800  | 0.02794200  |
| C | -1.77348700 | -0.30656200 | -0.09723600 |
| C | -2.97969500 | 0.58138700  | 0.06593400  |
| O | -1.77137000 | -1.49098900 | -0.23704400 |
| H | -2.79969300 | 1.58106900  | -0.33533500 |
| H | -3.84678500 | 0.12002100  | -0.41571500 |
| H | -3.18565200 | 0.68111600  | 1.13878100  |

IRC for **TS48** (R = F & R' = C(O)CH<sub>3</sub>)

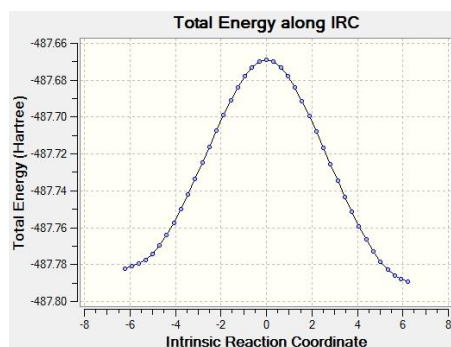

Cartesian coordinates for **S49** (R = CH<sub>3</sub> & R' = CN)

|   |             |             |             |
|---|-------------|-------------|-------------|
| C | -0.64133600 | -0.57225100 | 0.63509400  |
| C | 0.49538800  | -1.08803800 | -0.30442500 |
| C | 0.92601800  | 0.02347600  | -1.28644400 |
| C | 1.29690300  | 1.34179600  | -0.58616400 |
| C | 0.15414100  | 1.84052900  | 0.31240100  |
| C | -0.27343900 | 0.76831700  | 1.32534600  |
| H | 1.76792300  | -0.33704100 | -1.89018700 |
| H | 0.07897400  | -1.91497800 | -0.89301800 |
| H | -0.82591400 | -1.32980300 | 1.40833300  |
| H | 2.20456200  | 1.20645300  | 0.01748000  |
| H | 1.54019500  | 2.10062100  | -1.33913200 |
| H | 0.45572400  | 2.74907000  | 0.84680100  |
| H | -0.70774000 | 2.11551500  | -0.31041100 |
| H | 0.54716600  | 0.56967000  | 2.02512300  |
| H | -1.12219400 | 1.11478400  | 1.92455300  |
| H | 0.10152100  | 0.21420300  | -1.98610400 |
| C | 1.66910300  | -1.65823600 | 0.50906100  |
| H | 2.15770400  | -0.90564700 | 1.13557300  |
| H | 1.33587300  | -2.47100900 | 1.16441700  |
| H | 2.42979100  | -2.06707000 | -0.16449500 |
| C | -1.90373300 | -0.43814900 | -0.11091000 |
| N | -2.90026600 | -0.33563400 | -0.70038400 |

Cartesian coordinates for **TS49** (R = CH<sub>3</sub> & R' = CN)

|   |             |             |             |
|---|-------------|-------------|-------------|
| C | -0.07788500 | -0.84862000 | -0.72636900 |
| C | -0.14923200 | -0.94737600 | 0.66192900  |
| C | -0.45388800 | 0.24881500  | 1.54065900  |

|   |             |             |             |
|---|-------------|-------------|-------------|
| C | -0.33370200 | 1.58409900  | 0.78171300  |
| C | -0.97919500 | 1.52588700  | -0.61109600 |
| C | -0.33792800 | 0.42242300  | -1.46654400 |
| H | 0.40165000  | -1.65855400 | -1.26620800 |
| H | 0.31156600  | -1.81348900 | 1.12352900  |
| H | 0.27809400  | 0.21182600  | 2.35254600  |
| H | 0.73144300  | 1.80839700  | 0.66717700  |
| H | -0.85148700 | 2.48448100  | -1.12408600 |
| H | -0.88969600 | 0.22995400  | -2.39397100 |
| H | 0.68857700  | 0.70858400  | -1.75008900 |
| H | -2.06418100 | 1.37015900  | -0.52560300 |
| H | -0.78508900 | 2.38297900  | 1.37911000  |
| H | -1.44449000 | 0.13388500  | 2.00033100  |
| C | -1.71304500 | -1.59944700 | -0.08992200 |
| H | -1.89936600 | -2.16630100 | 0.82288300  |
| H | -2.43836200 | -0.80161400 | -0.21140400 |
| H | -1.71998900 | -2.30812600 | -0.91775400 |
| C | 2.58605400  | -0.52766400 | 0.50442000  |
| N | 2.63346500  | 0.03844500  | -0.53217100 |

IRC for **TS49** (R = CH<sub>3</sub> & R' = CN)

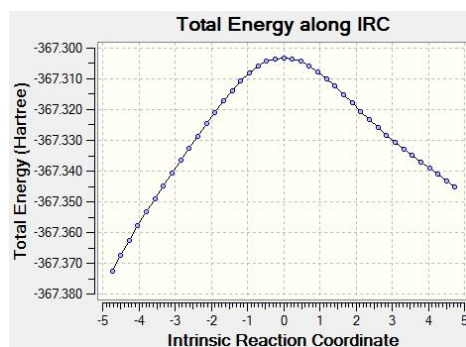

Cartesian coordinates for **S50** (R = NH<sub>2</sub> & R' = CN)

|   |             |             |             |
|---|-------------|-------------|-------------|
| C | -0.67469400 | -0.52538200 | 0.65297500  |
| C | 0.43654200  | -1.13624600 | -0.27927900 |
| C | 0.92307100  | -0.07976900 | -1.28779700 |
| C | 1.38885500  | 1.22183700  | -0.61258100 |
| C | 0.29203400  | 1.81541200  | 0.28668100  |
| C | -0.20382700 | 0.79261000  | 1.31934100  |
| H | 1.72988000  | -0.51912000 | -1.88292000 |
| H | -0.01768300 | -1.96445700 | -0.83441100 |
| H | -0.90272900 | -1.26194700 | 1.43476900  |
| H | 2.29453100  | 1.03601500  | -0.01707300 |
| H | 1.67926100  | 1.94802500  | -1.38047400 |
| H | 0.66266100  | 2.70792600  | 0.80421600  |
| H | -0.55267700 | 2.14195400  | -0.33454600 |
| H | 0.60874400  | 0.54130300  | 2.01344300  |
| H | -1.01458200 | 1.20911700  | 1.92604800  |
| H | 0.09902200  | 0.15081700  | -1.97457600 |
| N | 1.56629000  | -1.70276000 | 0.45472000  |
| H | 2.06042600  | -1.01570400 | 1.01510900  |
| H | 1.28390600  | -2.46492600 | 1.06408700  |
| C | -1.92267500 | -0.32108700 | -0.09710900 |
| N | -2.90437400 | -0.17056100 | -0.70144200 |

Cartesian coordinates for **TS50** (R = NH<sub>2</sub> & R' = CN)

|   |             |             |             |
|---|-------------|-------------|-------------|
| C | 0.00905300  | 0.90167300  | 0.72360400  |
| C | 0.10562500  | 0.88230600  | -0.73618700 |
| C | -0.24454300 | -0.38483100 | -1.51122900 |
| C | -0.66231100 | -1.55843900 | -0.60430700 |

|   |             |             |             |
|---|-------------|-------------|-------------|
| C | -1.53890500 | -1.10856000 | 0.57364500  |
| C | -0.76767500 | -0.13996100 | 1.48885300  |
| H | 0.57125600  | 1.64932100  | 1.26494500  |
| H | 0.92243500  | 1.46193200  | -1.15596300 |
| H | 0.64558000  | -0.66491200 | -2.07917900 |
| H | 0.24598400  | -2.02368400 | -0.20816400 |
| H | -1.85759900 | -1.97323900 | 1.16467800  |
| H | -1.42749800 | 0.35093900  | 2.21378700  |
| H | -0.00861500 | -0.68579400 | 2.05490300  |
| H | -2.46819300 | -0.64440100 | 0.20513500  |
| H | -1.18288900 | -2.31219600 | -1.20436800 |
| H | -1.03293200 | -0.14375600 | -2.23794700 |
| C | 2.30835200  | -0.11574300 | 0.80458400  |
| N | 2.94605200  | -0.34927500 | -0.15881300 |
| N | -1.05128700 | 1.76730000  | -0.34210700 |
| H | -0.93509100 | 2.76965400  | -0.43339500 |
| H | -1.99336800 | 1.43128500  | -0.51177400 |

Cartesian coordinates for **S51** (R = OH & R' = CN)

|   |             |             |             |
|---|-------------|-------------|-------------|
| C | -0.69898100 | -0.48977800 | 0.66881300  |
| C | 0.38474000  | -1.16580900 | -0.23064100 |
| C | 0.94303800  | -0.18203700 | -1.26847100 |
| C | 1.45236300  | 1.12516700  | -0.63405600 |
| C | 0.37089500  | 1.79340100  | 0.23111400  |
| C | -0.17628200 | 0.82893700  | 1.29384900  |
| H | 1.73931200  | -0.68212800 | -1.83114700 |
| H | -0.06966900 | -2.02181400 | -0.73796500 |
| H | -0.94488800 | -1.20123200 | 1.46594300  |
| H | 2.34469600  | 0.93045700  | -0.01864000 |
| H | 1.78574200  | 1.80825000  | -1.42318900 |
| H | 0.77342000  | 2.68833900  | 0.71932200  |
| H | -0.45270500 | 2.13086000  | -0.41198000 |
| H | 0.61612900  | 0.56506900  | 2.00606800  |
| H | -0.97371900 | 1.30115700  | 1.87650200  |
| H | 0.14491000  | 0.05246800  | -1.98382900 |
| C | -1.93056100 | -0.26024000 | -0.10011400 |
| N | -2.89770100 | -0.07898800 | -0.71879200 |
| O | 1.40127400  | -1.73321500 | 0.59580600  |
| H | 2.03921900  | -1.05063300 | 0.84105400  |

Cartesian coordinates for **TS51** (R = OH & R' = CN)

|   |             |             |             |
|---|-------------|-------------|-------------|
| C | -0.10388100 | -0.96752400 | -0.65804900 |
| C | -0.03871200 | -0.88841100 | 0.76478600  |
| C | -0.35242900 | 0.38163000  | 1.51566700  |
| C | -0.49823100 | 1.60958300  | 0.59777200  |
| C | -1.26755000 | 1.28905400  | -0.69263300 |
| C | -0.56725100 | 0.18343200  | -1.50474300 |
| H | 0.33276300  | -1.83346700 | -1.13882700 |
| H | 0.44669000  | -1.70099900 | 1.28932800  |
| H | 0.45411500  | 0.53918500  | 2.23709300  |
| H | 0.50448300  | 1.96149600  | 0.33533400  |
| H | -1.35274300 | 2.18538800  | -1.31492900 |
| H | -1.20488600 | -0.20046700 | -2.30913000 |
| H | 0.33544700  | 0.57873100  | -1.98219200 |
| H | -2.30257800 | 0.99653200  | -0.45603500 |
| H | -0.99624400 | 2.41521400  | 1.14690000  |
| H | -1.26096700 | 0.20951900  | 2.10875500  |
| C | 2.18331100  | -0.23688200 | -0.09582000 |
| N | 3.28509900  | 0.16043000  | -0.17934300 |
| O | -1.48323500 | -1.68199800 | 0.19818900  |
| H | -2.21742700 | -1.04345800 | 0.19171500  |

IRC for **TS51** (R = OH & R' = CN)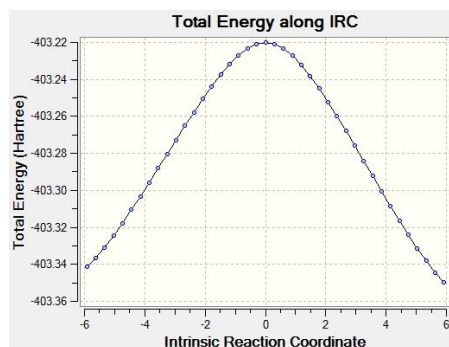Cartesian coordinates for **S52** (R = F & R' = CN)

|   |             |             |             |
|---|-------------|-------------|-------------|
| C | -0.72009500 | -0.45120200 | 0.66496000  |
| C | 0.32601400  | -1.16857600 | -0.22248700 |
| C | 0.97187300  | -0.25076100 | -1.25256700 |
| C | 1.53090900  | 1.03649900  | -0.62422000 |
| C | 0.46339400  | 1.77004000  | 0.20323900  |
| C | -0.14082400 | 0.85170600  | 1.27548600  |
| H | 1.75786400  | -0.81000200 | -1.77153300 |
| H | -0.11488300 | -2.05292100 | -0.69319200 |
| H | -0.99797800 | -1.14261300 | 1.46991800  |
| H | 2.38318400  | 0.78380800  | 0.01864700  |
| H | 1.91464100  | 1.69063400  | -1.41500500 |
| H | 0.89870100  | 2.65292800  | 0.68496900  |
| H | -0.33385400 | 2.13538300  | -0.45838500 |
| H | 0.63339700  | 0.55488300  | 1.99163800  |
| H | -0.92521900 | 1.36669500  | 1.83931600  |
| H | 0.20769700  | -0.00369800 | -2.00137700 |
| C | -1.93869500 | -0.19123800 | -0.11564600 |
| N | -2.89925800 | 0.01451700  | -0.73598000 |
| F | 1.32397700  | -1.65061400 | 0.65714200  |

Cartesian coordinates for **TS52** (R = F & R' = CN)

|   |             |             |             |
|---|-------------|-------------|-------------|
| C | 0.15211200  | 0.90935700  | 0.60390100  |
| C | 0.22450100  | 0.73235000  | -0.79832500 |
| C | -0.32859800 | -0.48042800 | -1.48349300 |
| C | -0.68112000 | -1.61614900 | -0.50949500 |
| C | -1.40527900 | -1.08602500 | 0.73798100  |
| C | -0.54653800 | -0.06714100 | 1.50779800  |
| H | 0.57512700  | 1.81620100  | 1.02045300  |
| H | 0.68885100  | 1.51808500  | -1.38310600 |
| H | 0.37747800  | -0.81088000 | -2.25205900 |
| H | 0.23883700  | -2.13522100 | -0.21383100 |
| H | -1.66216400 | -1.91462900 | 1.40584900  |
| H | -1.16039200 | 0.52799500  | 2.19184900  |
| H | 0.21055500  | -0.56406200 | 2.12498500  |
| H | -2.34028400 | -0.60115700 | 0.44004100  |
| H | -1.30695800 | -2.34959100 | -1.02783300 |
| H | -1.22255300 | -0.12114900 | -2.00761500 |
| C | 1.97540200  | 0.08167500  | 0.10948500  |
| N | 3.07645600  | -0.29760500 | 0.21030100  |
| F | -1.36406500 | 1.76397800  | -0.30866100 |



IRC for **TS52** (R = F & R' = CN)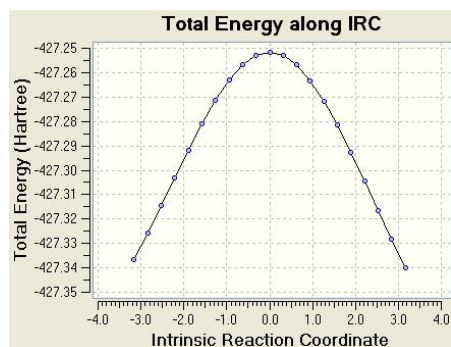Cartesian coordinates for **S53** (R = C(O)CH<sub>3</sub> & R' = CN)

|   |             |             |             |
|---|-------------|-------------|-------------|
| C | 0.51437700  | -0.81486200 | -0.53431100 |
| C | -0.46890000 | -0.36373600 | 0.60370700  |
| C | 0.09464700  | 0.83985300  | 1.39053900  |
| C | 0.60631200  | 1.99360300  | 0.51051900  |
| C | 1.59460200  | 1.50214300  | -0.55668000 |
| C | 0.98060800  | 0.37985800  | -1.40448300 |
| H | -0.67598700 | 1.20577900  | 2.07799000  |
| H | -0.57626500 | -1.21394000 | 1.28927400  |
| H | 0.01052900  | -1.54767500 | -1.17806500 |
| H | -0.24383100 | 2.48257500  | 0.02500900  |
| H | 1.08913200  | 2.74194500  | 1.15005800  |
| H | 1.88916900  | 2.33081600  | -1.21073500 |
| H | 2.51440000  | 1.13686900  | -0.07980700 |
| H | 0.10380000  | 0.76003600  | -1.94164400 |
| H | 1.69120100  | 0.01899400  | -2.15568800 |
| H | 0.91940600  | 0.46750500  | 2.01233900  |
| C | -1.86001500 | -0.12341700 | -0.00101700 |
| C | 1.66358500  | -1.52169800 | 0.05466200  |
| N | 2.56638100  | -2.08648000 | 0.51992700  |
| O | -2.25037000 | 0.98541300  | -0.32288800 |
| C | -2.75027400 | -1.34423000 | -0.15336700 |
| H | -3.57777900 | -1.12275700 | -0.82926100 |
| H | -2.19586500 | -2.22050300 | -0.50538000 |
| H | -3.15927600 | -1.60266300 | 0.83210300  |

Cartesian coordinates for **TS53** (R = C(O)CH<sub>3</sub> & R' = CN)

|   |             |             |             |
|---|-------------|-------------|-------------|
| C | -0.18079461 | -0.92093917 | -0.61429799 |
| C | -0.11562561 | -0.84182617 | 0.80853701  |
| C | -0.42934261 | 0.42821483  | 1.55941801  |
| C | -0.57514461 | 1.65616783  | 0.64152301  |
| C | -1.34446361 | 1.33563883  | -0.64888199 |
| C | -0.64416461 | 0.23001683  | -1.46099199 |
| H | 0.25584939  | -1.78688217 | -1.09507599 |
| H | 0.36977639  | -1.65441417 | 1.33307901  |
| H | 0.37720139  | 0.58576983  | 2.28084401  |
| H | 0.42756939  | 2.00808083  | 0.37908501  |
| H | -1.42965661 | 2.23197283  | -1.27117799 |
| H | -1.28179961 | -0.15388217 | -2.26537899 |
| H | 0.25853339  | 0.62531583  | -1.93844099 |
| H | -2.37949161 | 1.04311683  | -0.41228399 |
| H | -1.07315761 | 2.46179883  | 1.19065101  |
| H | -1.33788061 | 0.25610383  | 2.15250601  |
| C | 2.10639739  | -0.19029717 | -0.05206899 |
| N | 3.20818539  | 0.20701483  | -0.13559199 |
| C | -2.40447567 | -2.04282412 | 0.29057473  |
| C | -3.24341193 | -2.51574677 | -0.91114492 |
| H | -2.70507615 | -3.26892883 | -1.44762547 |

|   |             |             |             |
|---|-------------|-------------|-------------|
| H | -4.17034588 | -2.92035374 | -0.56187907 |
| H | -3.43771102 | -1.68654685 | -1.55889129 |
| O | -3.35051302 | -1.46983067 | 0.82871211  |

IRC for **TS53** (R = C(O)CH<sub>3</sub> & R' = CN)

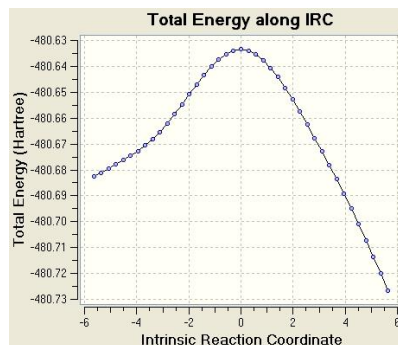

Cartesian coordinates for **S54** (R = F & R' = Cl)

|    |             |             |             |
|----|-------------|-------------|-------------|
| C  | -0.68242600 | -0.36300500 | 0.64332900  |
| C  | 0.32627500  | -1.17061600 | -0.18500200 |
| C  | 1.11062400  | -0.33762000 | -1.19082900 |
| C  | 1.72797000  | 0.91967600  | -0.55622600 |
| C  | 0.66676600  | 1.75715300  | 0.17584500  |
| C  | -0.07896800 | 0.91668600  | 1.22313300  |
| H  | 1.88171200  | -0.97400100 | -1.63860700 |
| H  | -0.16588400 | -2.02322100 | -0.66141900 |
| H  | -1.08694400 | -1.00002600 | 1.43152500  |
| H  | 2.51228300  | 0.62126900  | 0.15074500  |
| H  | 2.21553600  | 1.51893500  | -1.33349500 |
| H  | 1.13550900  | 2.61674000  | 0.66842500  |
| H  | -0.05188400 | 2.16204100  | -0.54804800 |
| H  | 0.62408200  | 0.59817600  | 2.00485700  |
| H  | -0.86372400 | 1.49860600  | 1.71673200  |
| H  | 0.42120700  | -0.05274000 | -1.99509400 |
| F  | 1.23568800  | -1.71981500 | 0.75963600  |
| Cl | -2.12732500 | 0.01052400  | -0.42905000 |

Cartesian coordinates for **TS54** (R = F & R' = Cl)

|    |             |             |             |
|----|-------------|-------------|-------------|
| C  | 0.16051300  | 0.90170600  | 0.58461300  |
| C  | 0.22568100  | 0.66868100  | -0.82637500 |
| C  | -0.45808600 | -0.49368800 | -1.47438000 |
| C  | -0.94980200 | -1.54821000 | -0.46858900 |
| C  | -1.62062600 | -0.89688400 | 0.75000400  |
| C  | -0.65987500 | 0.04523200  | 1.49883500  |
| H  | 0.68832000  | 1.75742600  | 0.98335700  |
| H  | 0.79360900  | 1.36234600  | -1.43135700 |
| H  | 0.22202700  | -0.92880100 | -2.21323600 |
| H  | -0.09687700 | -2.15380800 | -0.14352100 |
| H  | -1.97481100 | -1.66726400 | 1.44276900  |
| H  | -1.20635300 | 0.71879800  | 2.16859000  |
| H  | 0.03875500  | -0.51764600 | 2.12809700  |
| H  | -2.49579500 | -0.32445800 | 0.42501100  |
| H  | -1.65255600 | -2.22086700 | -0.97108800 |
| H  | -1.29856000 | -0.06275100 | -2.03447000 |
| F  | -1.16679000 | 1.85245700  | -0.39061300 |
| Cl | 2.19391300  | -0.27624200 | 0.16333700  |

IRC for **TS54** (R = F & R' = Cl)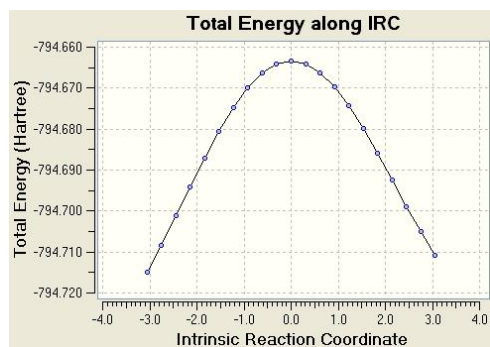Cartesian coordinates for **S55** (R = F & R' = Br)

|    |             |             |             |
|----|-------------|-------------|-------------|
| C  | -0.10883200 | -0.37316800 | 0.77794100  |
| C  | 0.79789000  | -1.16950600 | -0.16378800 |
| C  | 1.45952800  | -0.32794100 | -1.24849700 |
| C  | 2.13254800  | 0.93285200  | -0.68100700 |
| C  | 1.14895900  | 1.76102700  | 0.16140900  |
| C  | 0.53169500  | 0.91518400  | 1.28566800  |
| H  | 2.18277100  | -0.95729700 | -1.77840800 |
| H  | 0.26315000  | -2.02589500 | -0.58312300 |
| H  | -0.42132100 | -1.01253500 | 1.60369000  |
| H  | 2.99018400  | 0.63916400  | -0.06296200 |
| H  | 2.52802700  | 1.53690600  | -1.50543900 |
| H  | 1.65831200  | 2.62778100  | 0.59775600  |
| H  | 0.35168100  | 2.15415500  | -0.48225800 |
| H  | 1.32148000  | 0.60993300  | 1.98673900  |
| H  | -0.20082300 | 1.48958400  | 1.86083100  |
| H  | 0.68575200  | -0.04709400 | -1.97314200 |
| F  | 1.81533000  | -1.71372500 | 0.67015900  |
| Br | -1.81336900 | -0.00062500 | -0.18529900 |

Cartesian coordinates for **TS55** (R = F & R' = Br)

|    |             |             |             |
|----|-------------|-------------|-------------|
| C  | -0.35327200 | 0.91862800  | 0.57879500  |
| C  | -0.33100000 | 0.71323500  | -0.83630900 |
| C  | -0.96576600 | -0.47931900 | -1.48192600 |
| C  | -1.34040800 | -1.58313900 | -0.47894300 |
| C  | -1.99829200 | -1.00258000 | 0.78271600  |
| C  | -1.07896800 | -0.00393500 | 1.51197200  |
| H  | 0.10105900  | 1.82006600  | 0.96666800  |
| H  | 0.13704100  | 1.46929600  | -1.45180400 |
| H  | -0.29936500 | -0.85552800 | -2.26431200 |
| H  | -0.43836100 | -2.14159200 | -0.20469800 |
| H  | -2.26454800 | -1.80922800 | 1.47365200  |
| H  | -1.65291100 | 0.62685700  | 2.19989300  |
| H  | -0.33070500 | -0.52393000 | 2.11953100  |
| H  | -2.92547900 | -0.48934900 | 0.50733100  |
| H  | -2.02077700 | -2.29023500 | -0.96492500 |
| H  | -1.85950800 | -0.09083500 | -1.98703300 |
| F  | -1.82287700 | 1.78935000  | -0.32509400 |
| Br | 1.83901900  | -0.09134300 | 0.05924900  |

IRC for **TS55** (R = F & R' = Br)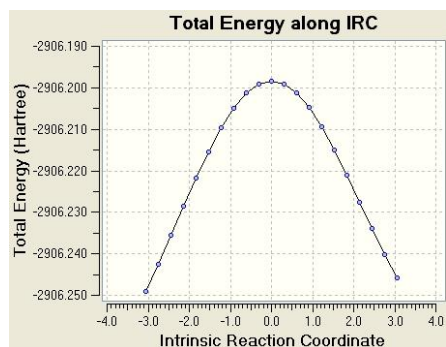Cartesian coordinates for **S56** (R = Cl & R' = Br)

|    |             |             |             |
|----|-------------|-------------|-------------|
| C  | -0.15984400 | -0.39180100 | 0.64852700  |
| C  | 0.81113500  | -0.70519600 | -0.49262000 |
| C  | 1.11612200  | 0.49910800  | -1.38535300 |
| C  | 1.47988500  | 1.76282500  | -0.59161200 |
| C  | 0.40473900  | 2.09359500  | 0.45657900  |
| C  | 0.15423200  | 0.90258700  | 1.39347800  |
| H  | 1.90850900  | 0.23166800  | -2.09098000 |
| H  | 0.45033500  | -1.54965100 | -1.07889000 |
| H  | -0.22789400 | -1.23776100 | 1.33031300  |
| H  | 2.44830900  | 1.61840100  | -0.09644700 |
| H  | 1.60203900  | 2.60186400  | -1.28590100 |
| H  | 0.70866600  | 2.96252100  | 1.05121100  |
| H  | -0.53061300 | 2.36781000  | -0.04754400 |
| H  | 1.05975200  | 0.70722800  | 1.98432800  |
| H  | -0.64966500 | 1.11767300  | 2.10362100  |
| H  | 0.21021100  | 0.68624500  | -1.97681200 |
| Br | -1.99999600 | -0.33036800 | -0.13942800 |
| Cl | 2.36368200  | -1.34763700 | 0.28312400  |

Cartesian coordinates for **TS56** (R = Cl & R' = Br)

|    |             |             |             |
|----|-------------|-------------|-------------|
| C  | 0.31192700  | -0.54614200 | 0.69474000  |
| C  | 0.31759800  | -0.52053600 | -0.73649500 |
| C  | 0.57199900  | 0.73887300  | -1.51359000 |
| C  | 0.52506600  | 2.00944900  | -0.64724700 |
| C  | 1.25452500  | 1.81677700  | 0.69218800  |
| C  | 0.66032800  | 0.66169200  | 1.51995600  |
| H  | 0.13892200  | -1.49213800 | 1.18792600  |
| H  | 0.13146600  | -1.44401500 | -1.26651700 |
| H  | -0.15240400 | 0.78722700  | -2.33315700 |
| H  | -0.52001400 | 2.28311100  | -0.46497900 |
| H  | 1.20500700  | 2.73792100  | 1.28185500  |
| H  | 1.36002100  | 0.33516500  | 2.29624800  |
| H  | -0.24976400 | 0.97900500  | 2.04068900  |
| H  | 2.31315700  | 1.60767300  | 0.50533000  |
| H  | 0.97861300  | 2.83539800  | -1.20476500 |
| H  | 1.55741800  | 0.62017600  | -1.97885700 |
| Br | -2.03163400 | -0.33482500 | 0.03313000  |
| Cl | 2.49977200  | -1.32301900 | -0.07533200 |

IRC for **TS56** (R = Cl & R' = Br)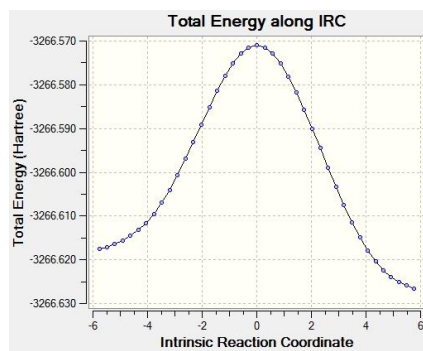

Supplement: c5ra25482e1.pdf [file c5ra25482e1.pdf]
